# Supplementary material for: Stereoselective synthesis of hexahydrofuro[3,4-b]furan-4-ol and its dimer via tandem Prins and pinacol rearrangement
Source: Royal Society of Chemistry journal article supplement (doi:10.1039/c9ob01353a), 2019-01-01

**Stereoselective Synthesis of Hexahydrofuro[3,4-*b*]furan-4-ol and Its Dimer via Tandem**

**Prins and Pinacol Rearrangement**

Sudip Shit, Namita Devi, Ngangbam Renubala Devi and Anil K Saikia\*

**Table of Content:**

|                                      |               |
|--------------------------------------|---------------|
| 1. HRMS spectra of all new compounds | <b>S2-S16</b> |
|--------------------------------------|---------------|

## HRMS spectrum of 3a

|               |           |             |                   |                 |              |                        |                       |
|---------------|-----------|-------------|-------------------|-----------------|--------------|------------------------|-----------------------|
| Sample Name   | SAMPLE    | Position    | P1-A30            | Instrument Name | Instrument 1 | User Name              |                       |
| Inj Vol       | 20        | InjPosition |                   | SampleType      | Sample       | IRM Calibration Status | Success               |
| Data Filename | SK-34-M.d | ACQ Method  | ESI.ALS 200-700.m | Comment         |              | Acquired Time          | 4/12/2019 11:07:09 AM |

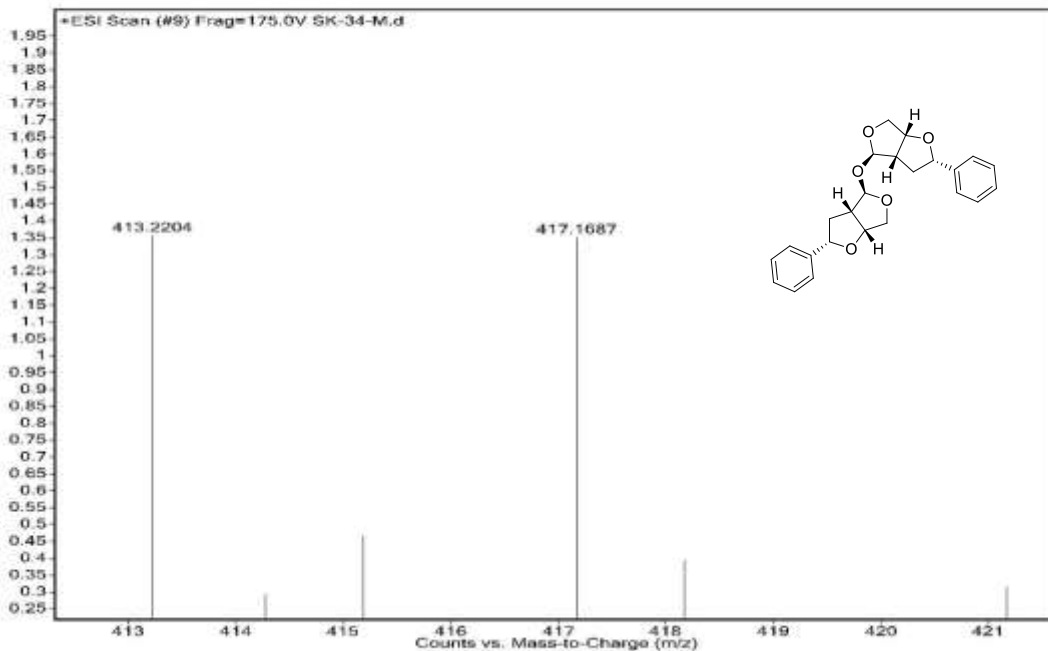

## HRMS spectrum of 4a

|             |                   |                        |         |                 |                                 |
|-------------|-------------------|------------------------|---------|-----------------|---------------------------------|
| Sample Name | SAMPLE            | Position               | P2-C2   | Instrument Name | Instrument 1                    |
| User Name   |                   | Inj Vol                | 20      | InjPosition     |                                 |
| Sample Type | Sample            | IRM Calibration Status | Success | Data Filename   | SK-P-348.d                      |
| ACQ Method  | ESI.ALS 100-700.m | Comment                |         | Acquired Time   | 18-04-2019 17:04:46 (UTC+05:30) |

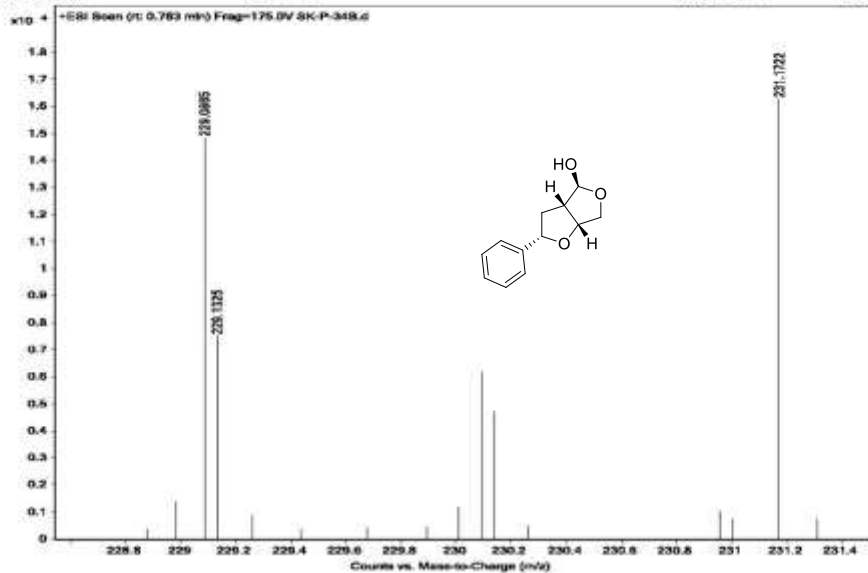

### HRMS spectrum of 3b

|             |                   |                        |         |                 |                                 |
|-------------|-------------------|------------------------|---------|-----------------|---------------------------------|
| Sample Name | SAMPLE            | Position               | P2-D1   | Instrument Name | Instrument 1                    |
| User Name   |                   | Inj Vol                | 20      | InjPosition     |                                 |
| Sample Type | Sample            | IRM Calibration Status | Success | Data Filename   | SK-P-27.d                       |
| ACQ Method  | ESI ALS 100-700.m | Comment                |         | Acquired Time   | 18-04-2019 17:56:40 (UTC+05:30) |

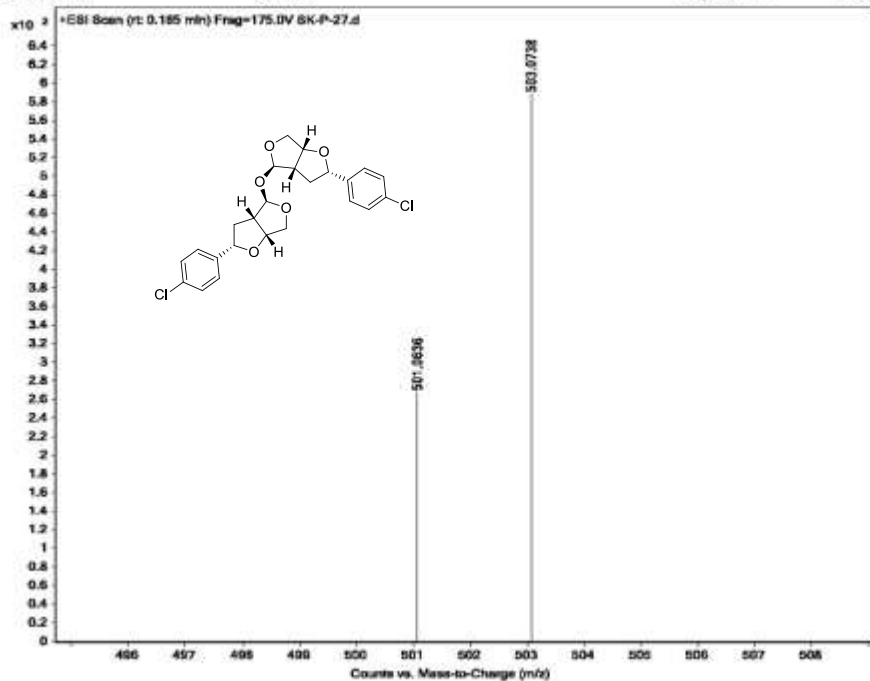

### HRMS spectrum of 4b

|               |             |             |                   |                 |              |                        |                       |
|---------------|-------------|-------------|-------------------|-----------------|--------------|------------------------|-----------------------|
| Sample Name   | SAMPLE 15   | Position    | P1-F5             | Instrument Name | Instrument 1 | User Name              |                       |
| Inj Vol       | 0.5         | InjPosition |                   | Sample Type     | Sample       | IRM Calibration Status | Success               |
| Data Filename | SK-P-27-B.d | ACQ Method  | ESI ALS 100-700.m | Comment         |              | Acquired Time          | 12/31/2018 4:01:10 PM |

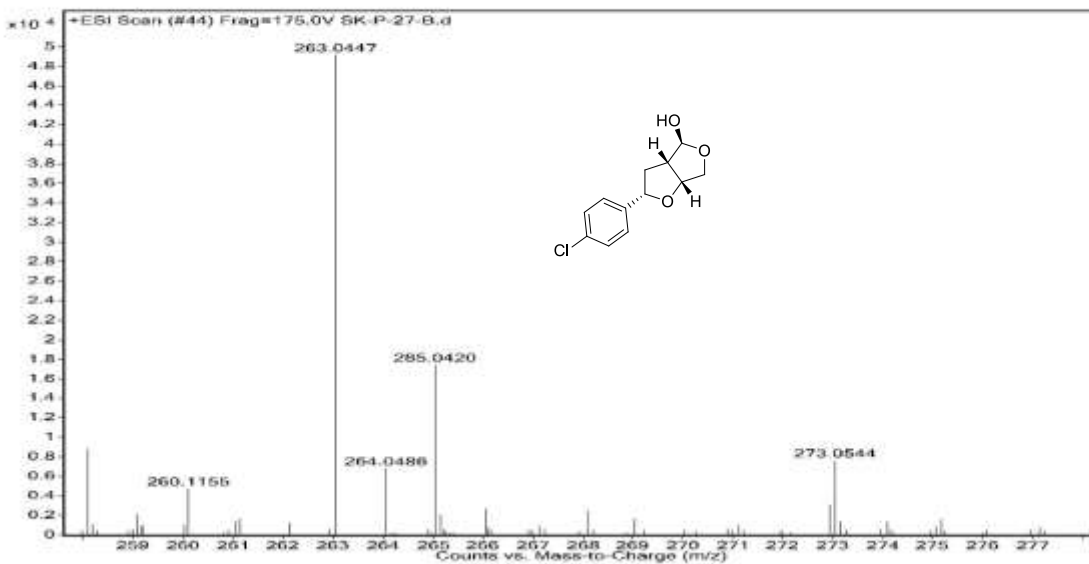

## HRMS spectrum of 3c

|               |           |             |                   |                 |              |                        |                       |
|---------------|-----------|-------------|-------------------|-----------------|--------------|------------------------|-----------------------|
| Sample Name   | SAMPLE    | Position    | PI-A6             | Instrument Name | Instrument 1 | User Name              |                       |
| Inj Vol       | 20        | InjPosition |                   | Sample Type     | Sample       | IRM Calibration Status | Success               |
| Data Filename | SK-32-M.d | ACQ Method  | ESI ALS 200-700.m | Comment         |              | Acquired Time          | 4/12/2019 10:58:22 AM |

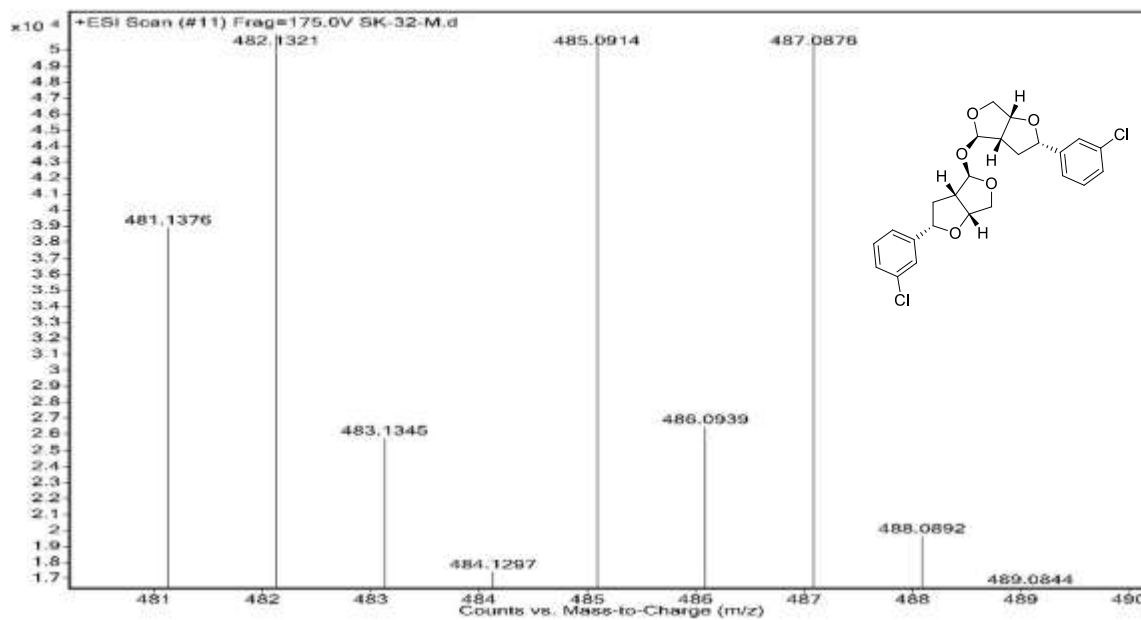

## HRMS spectrum of 4c

|               |           |             |                   |                 |              |                        |                       |
|---------------|-----------|-------------|-------------------|-----------------|--------------|------------------------|-----------------------|
| Sample Name   | SAMPLE    | Position    | PI-A7             | Instrument Name | Instrument 1 | User Name              |                       |
| Inj Vol       | 20        | InjPosition |                   | Sample Type     | Sample       | IRM Calibration Status | Success               |
| Data Filename | SK-32BM.d | ACQ Method  | ESI ALS 200-700.m | Comment         |              | Acquired Time          | 4/12/2019 11:01:33 AM |

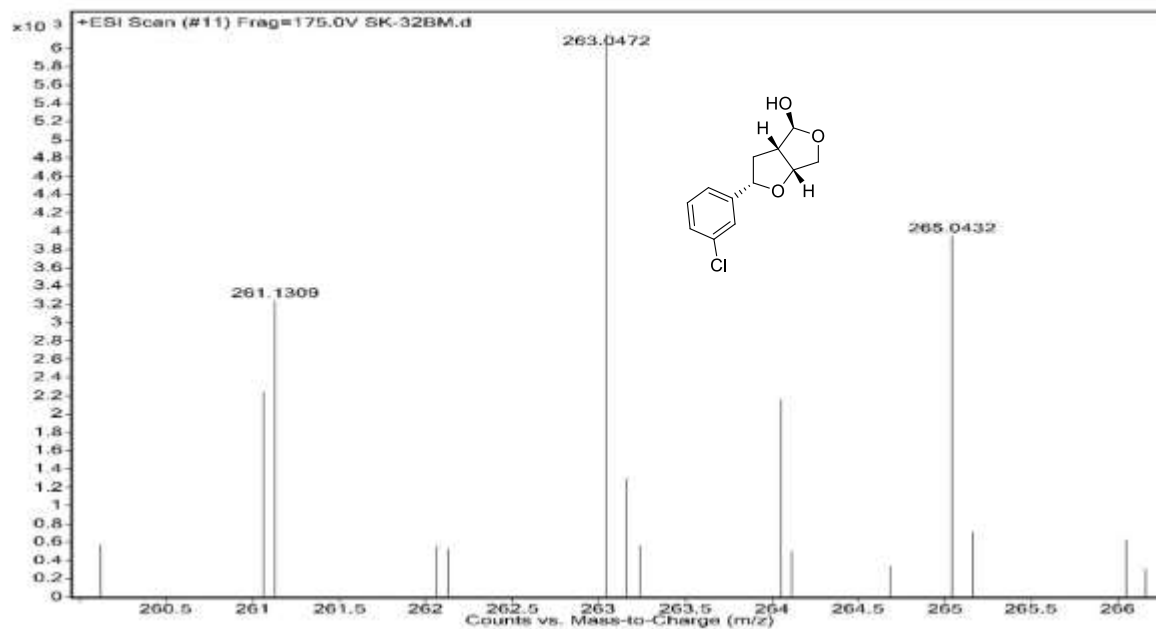

## HRMS spectrum of **3d**

|             |                    |                        |         |                 |                                 |
|-------------|--------------------|------------------------|---------|-----------------|---------------------------------|
| Sample Name | SAMPLE 50          | Position               | P2-D9   | Instrument Name | Instrument 1                    |
| User Name   |                    | Inj Vol                | 20      | InjPosition     |                                 |
| Sample Type | Sample             | IRM Calibration Status | Success | Data Filename   | 50-P-05.d                       |
| ACQ Method  | ESI ALS 100-1000.m | Comment                |         | Acquired Time   | 24-04-2019 17:39:03 (UTC+05:30) |

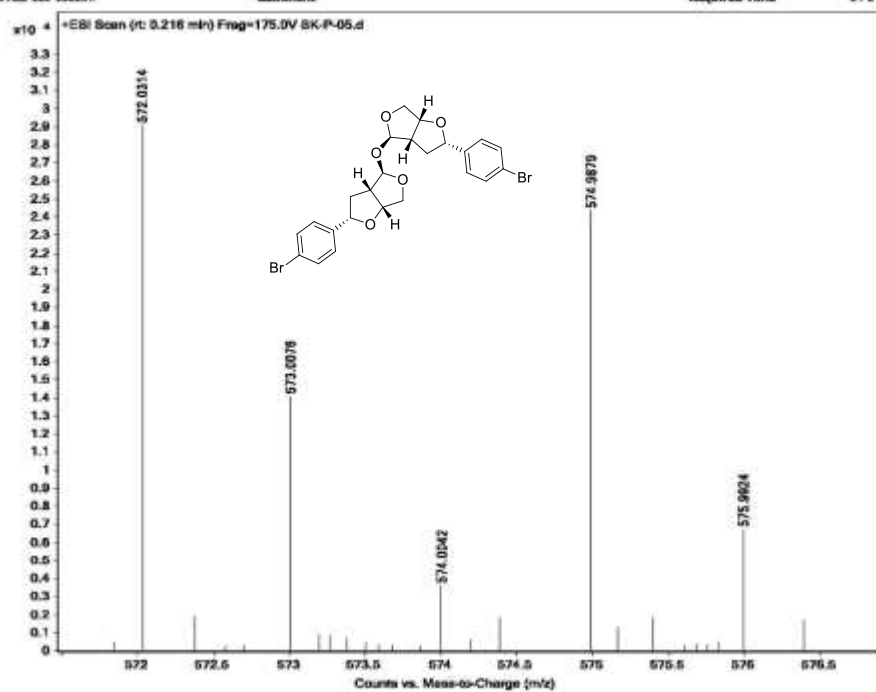

## HRMS spectrum of **4d**

|             |                   |                        |         |                 |                                 |
|-------------|-------------------|------------------------|---------|-----------------|---------------------------------|
| Sample Name | 059-SK-P          | Position               | P2-D10  | Instrument Name | Instrument 1                    |
| User Name   |                   | Inj Vol                | 20      | InjPosition     |                                 |
| Sample Type | Sample            | IRM Calibration Status | Success | Data Filename   | 059-SK-P.d                      |
| ACQ Method  | ESI ALS 200-500.m | Comment                |         | Acquired Time   | 14-05-2019 16:12:47 (UTC+05:30) |

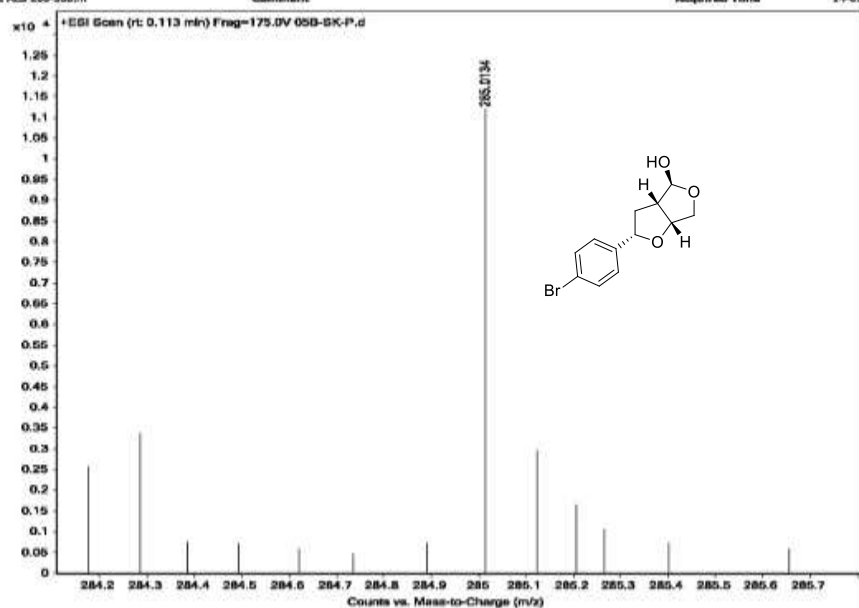

## HRMS spectrum of 3e

| Sample Name   | SAMPLE    | Position    | PI-M              | Instrument Name | Instrument 1 | User Name              |                       |
|---------------|-----------|-------------|-------------------|-----------------|--------------|------------------------|-----------------------|
| Inj Vol       | 20        | InjPosition |                   | SampleType      | Sample       | IRM Calibration Status | Success               |
| Data Filename | SK-37-M.d | ACQ Method  | ESI ALS 200-700.m | Comment         |              | Acquired Time          | 4/12/2019 11:03:21 AM |

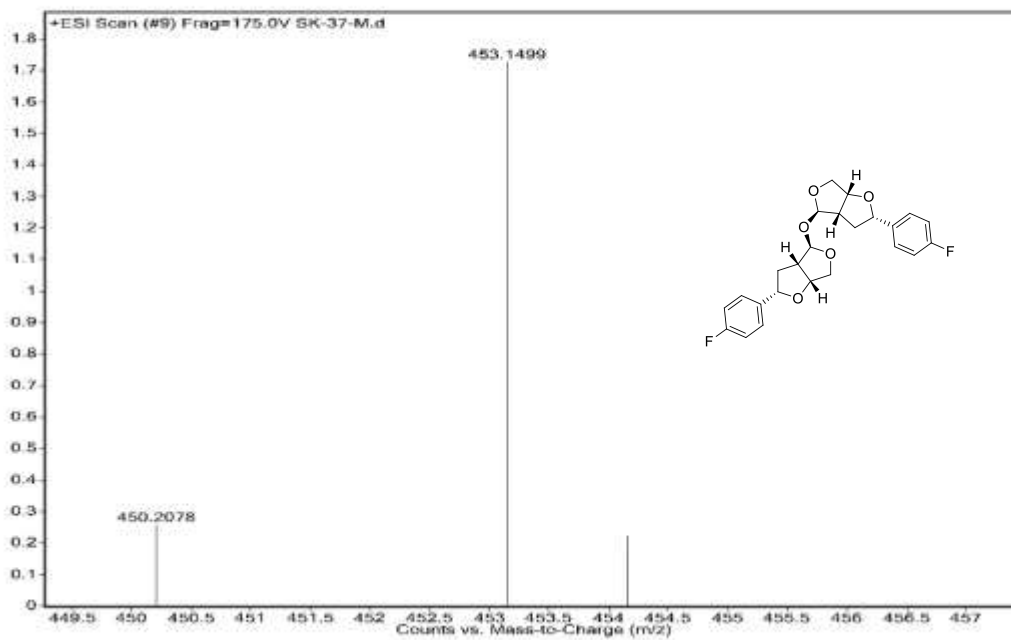

## HRMS spectrum of 4e

| Sample Name | SAMPLE            | Position               | PI-C2   | Instrument Name | Instrument 1                    |
|-------------|-------------------|------------------------|---------|-----------------|---------------------------------|
| User Name   |                   | Inj Vol                | 20      | InjPosition     |                                 |
| Sample Type | Sample            | IRM Calibration Status | Success | Data Filename   | SK-P-4-F-B-R.d                  |
| ACQ Method  | ESI ALS 100-500.m | Comment                |         | Acquired Time   | 26-01-2019 10:21:17 (UTC+05:30) |

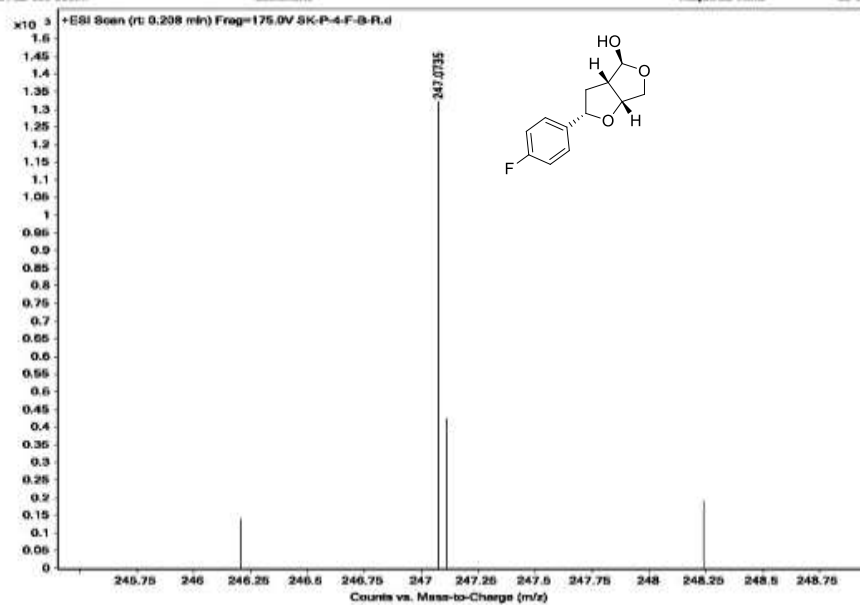

## HRMS spectrum of **3f**

| Sample Name | SAMPLE            | Position               | P2-011  | Instrument Name | Instrument 1                    |
|-------------|-------------------|------------------------|---------|-----------------|---------------------------------|
| User Name   |                   | Inj Vol                | 20      | InjPosition     |                                 |
| Sample Type | Sample            | IRM Calibration Status | Success | Data Filename   | SK-P-39.d                       |
| ACQ Method  | ESI ALS 100-700.m | Comment                |         | Acquired Time   | 18-01-2019 17:01:05 (UTC+05:30) |

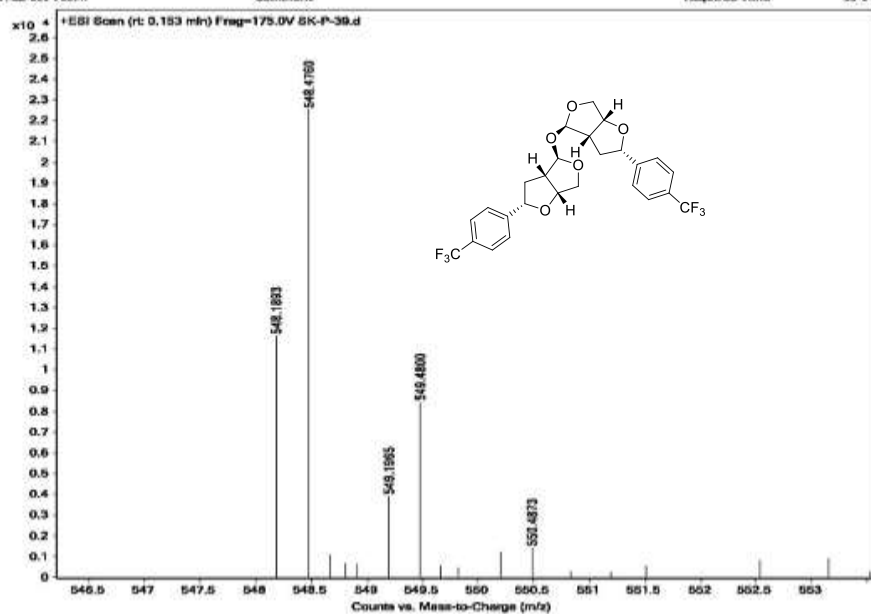

## HRMS spectrum of **4f**

| Sample Name | SAMPLE            | Position               | P1-011  | Instrument Name | Instrument 1                    |
|-------------|-------------------|------------------------|---------|-----------------|---------------------------------|
| User Name   |                   | Inj Vol                | 20      | InjPosition     |                                 |
| Sample Type | Sample            | IRM Calibration Status | Success | Data Filename   | SK-39.d                         |
| ACQ Method  | ESI ALS 200-700.m | Comment                |         | Acquired Time   | 12-04-2019 15:53:16 (UTC+05:30) |

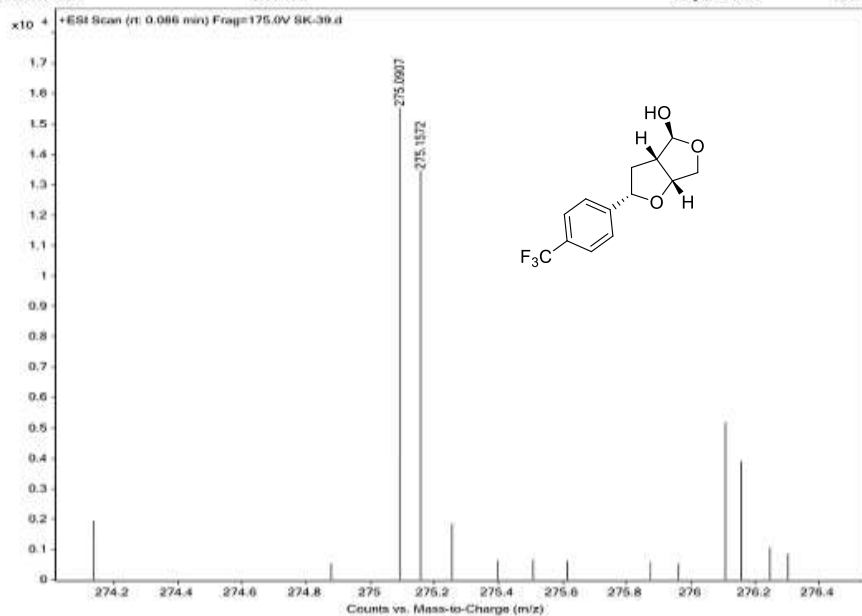

### HRMS spectrum of 3g

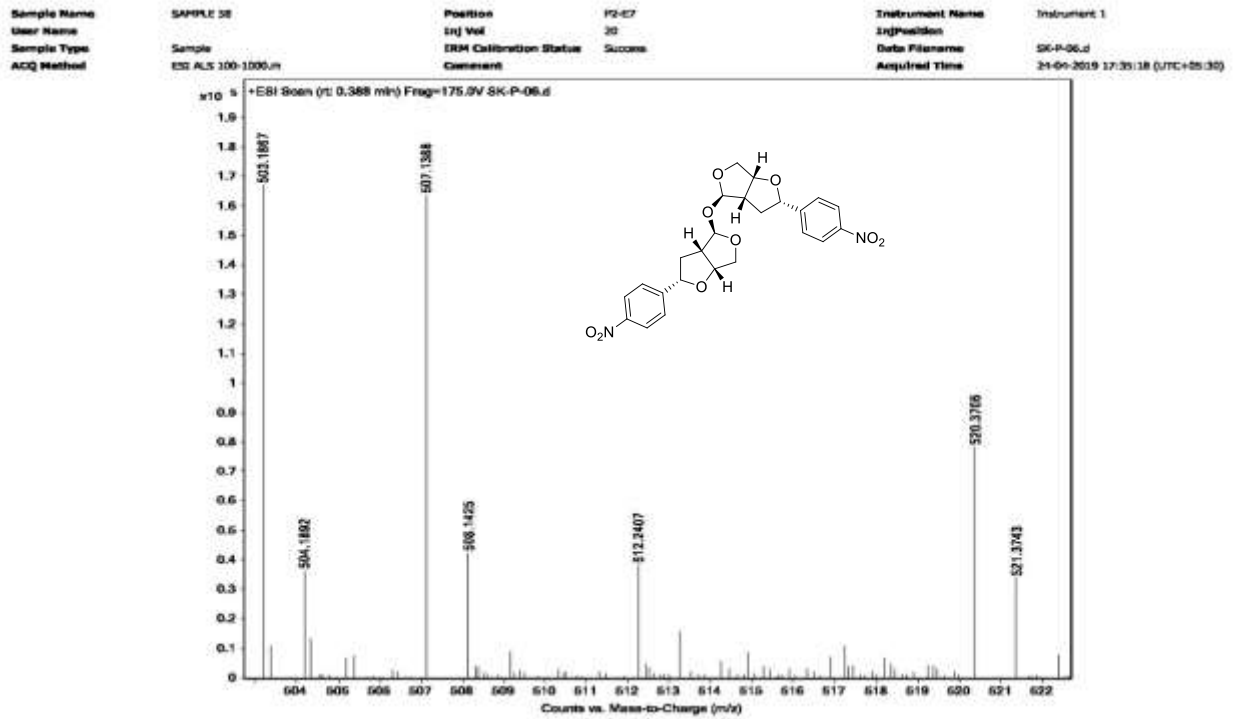

### HRMS spectrum of 4g

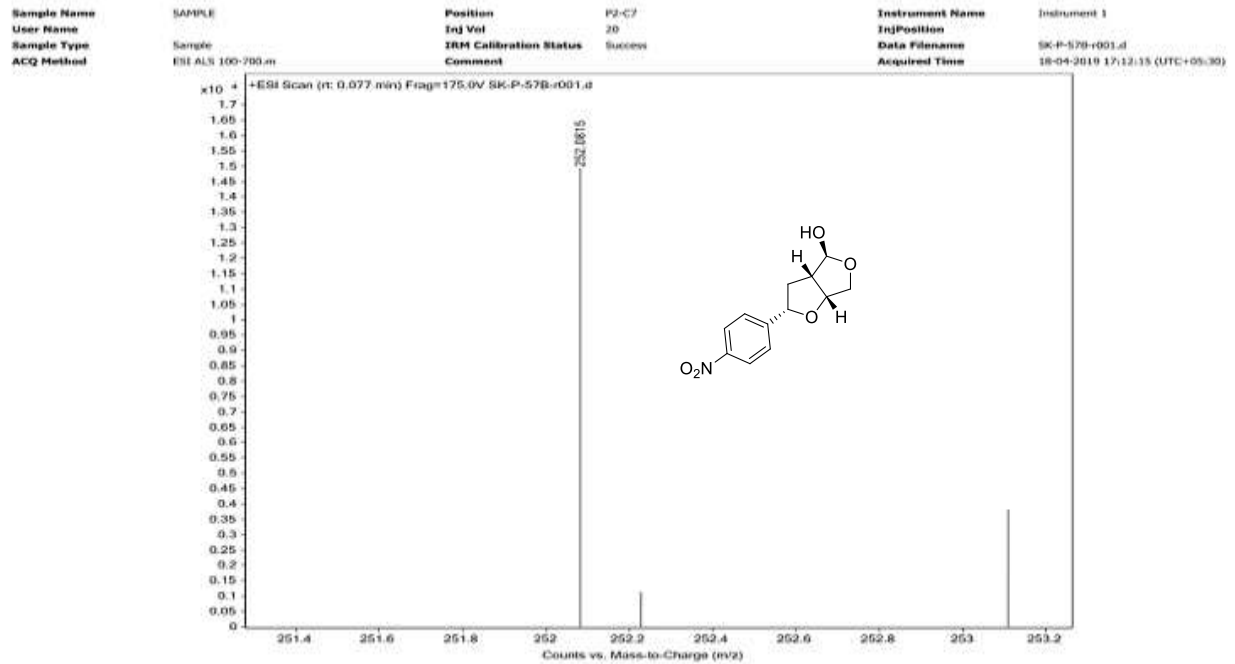



## HRMS spectrum of **3h**

|             |                    |                        |         |                 |                                 |
|-------------|--------------------|------------------------|---------|-----------------|---------------------------------|
| Sample Name | SAMPLE 17          | Position               | PJ-F7   | Instrument Name | Instrument 1                    |
| User Name   |                    | Inj Vol                | 20      | Inj Position    |                                 |
| Sample Type | Sample             | IRM Calibration Status | Success | Data Filename   | SK-P-26.d                       |
| ACQ Method  | ESI ALS 100-1000.m | Comment                |         | Acquired Time   | 21-04-2019 17:33:27 (UTC+05:30) |

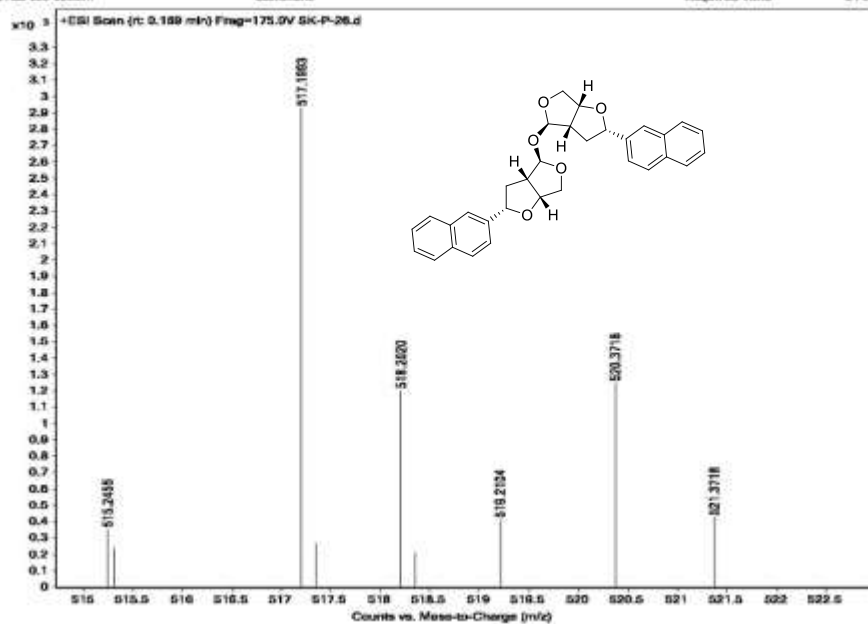

## HRMS spectrum of **4h**

|               |               |              |                   |                 |              |                        |                       |
|---------------|---------------|--------------|-------------------|-----------------|--------------|------------------------|-----------------------|
| Sample Name   | SAMPLE 17     | Position     | PJ-F7             | Instrument Name | Instrument 1 | User Name              |                       |
| Inj Vol       | 0.5           | Inj Position |                   | Sample Type     | Sample       | IRM Calibration Status | Success               |
| Data Filename | SK-P-NAPH-B.d | ACQ Method   | ESI ALS 100-700.m | Comment         |              | Acquired Time          | 12/31/2018 4:04:43 PM |

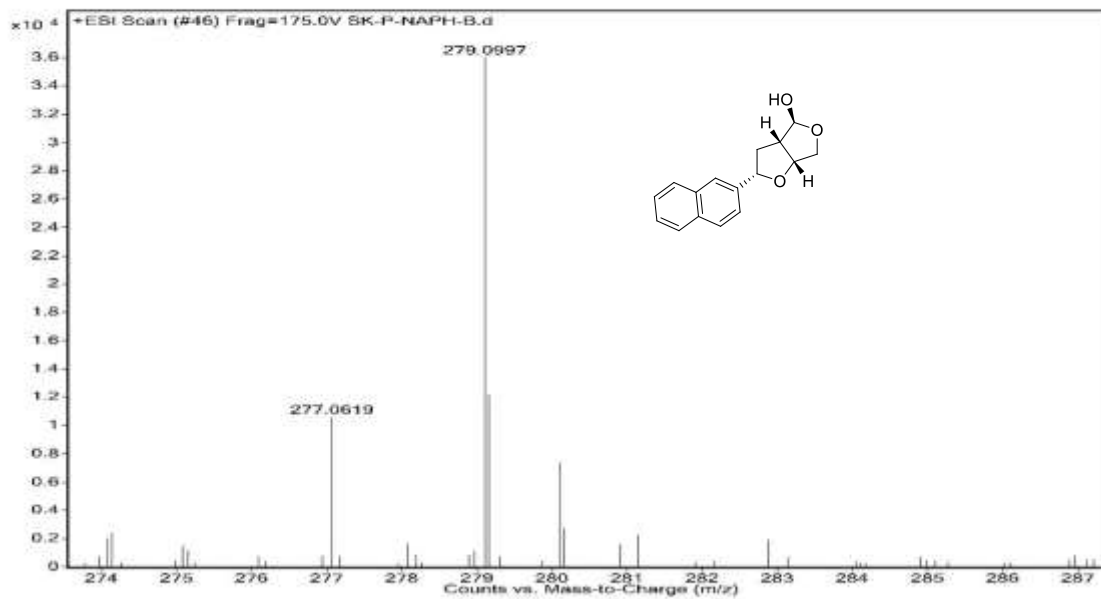

## HRMS spectrum of **3i**

|             |                    |                        |         |                 |                                 |
|-------------|--------------------|------------------------|---------|-----------------|---------------------------------|
| Sample Name | SAMPLE             | Position               | P2-P2   | Instrument Name | Instrument 1                    |
| User Name   |                    | Inj Vol                | 20      | InjPosition     |                                 |
| Sample Type | Sample             | IRM Calibration Status | Success | Data Filename   | SK-P-25.d                       |
| ACQ Method  | ESI ALS 100-1000.m | Comment                |         | Acquired Time   | 18-04-2019 18:20:55 (UTC+05:30) |

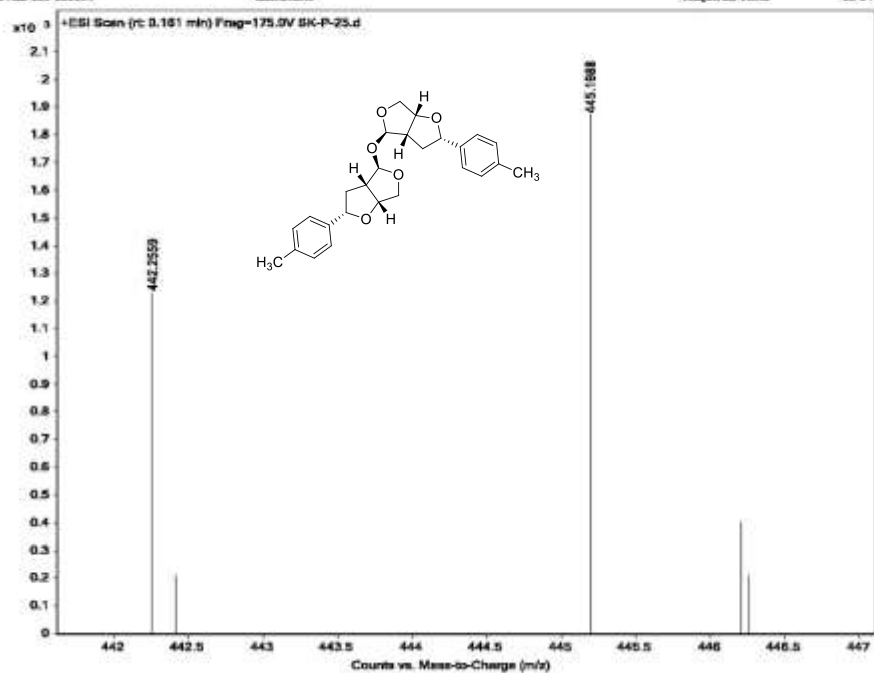

## HRMS spectrum of **4i**

|               |             |             |                   |                 |              |                        |                       |
|---------------|-------------|-------------|-------------------|-----------------|--------------|------------------------|-----------------------|
| Sample Name   | SAMPLE 13   | Position    | P1-P3             | Instrument Name | Instrument 1 | User Name              |                       |
| Inj Vol       | 0.5         | InjPosition |                   | SampleType      | Sample       | IRM Calibration Status | Success               |
| Data Filename | SK-P-25-B.d | ACQ Method  | ESI ALS 100-700.m | Comment         |              | Acquired Time          | 12/31/2018 3:57:36 PM |

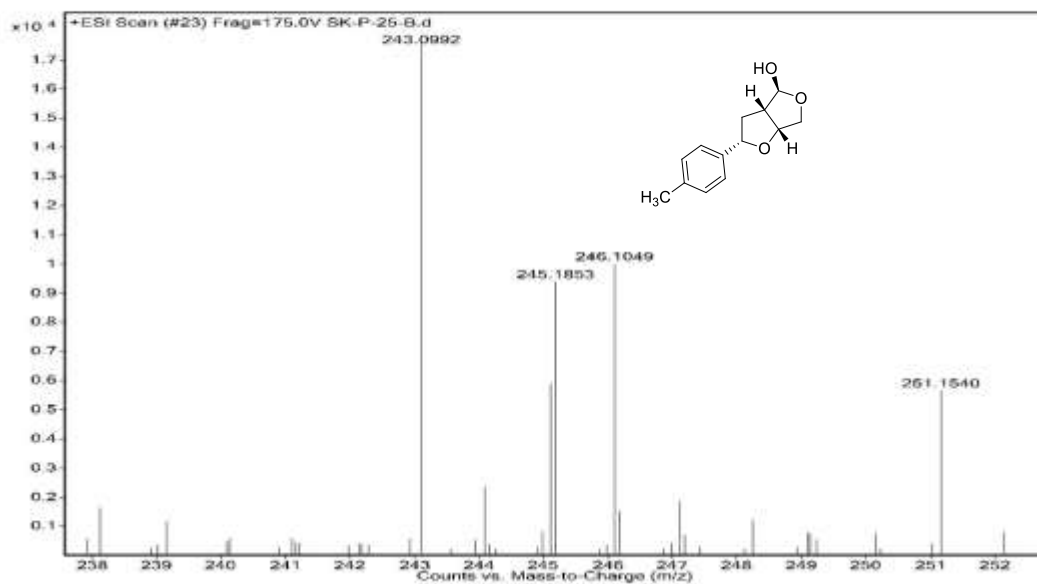

# HRMS spectrum of 4j

|               |          |             |                   |                 |              |                        |                      |
|---------------|----------|-------------|-------------------|-----------------|--------------|------------------------|----------------------|
| Sample Name   | SAMPLE   | Position    | P1-A11            | Instrument Name | Instrument 1 | User Name              |                      |
| Inj Vol       | 20       | InjPosition |                   | SampleType      | Sample       | IRM Calibration Status | Success              |
| Data Filename | SK-27B.d | ACQ Method  | ESI ALS 200-700.m | Comment         |              | Acquired Time          | 4/12/2019 3:51:24 PM |

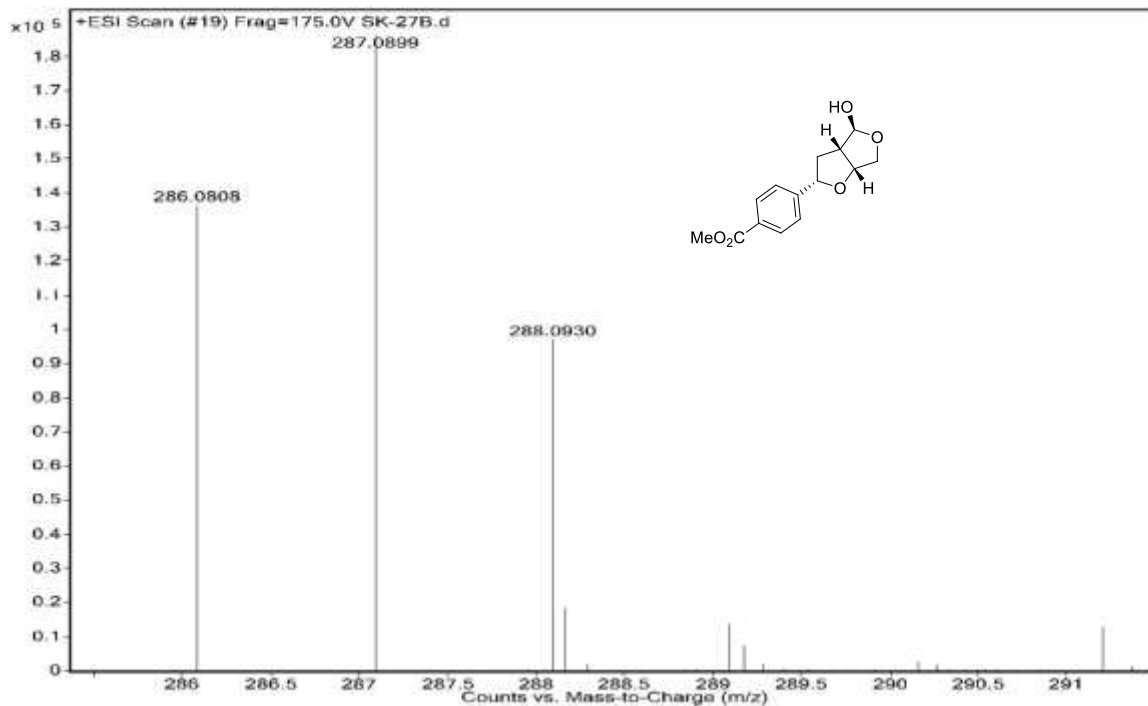

## HRMS spectrum of **3k**

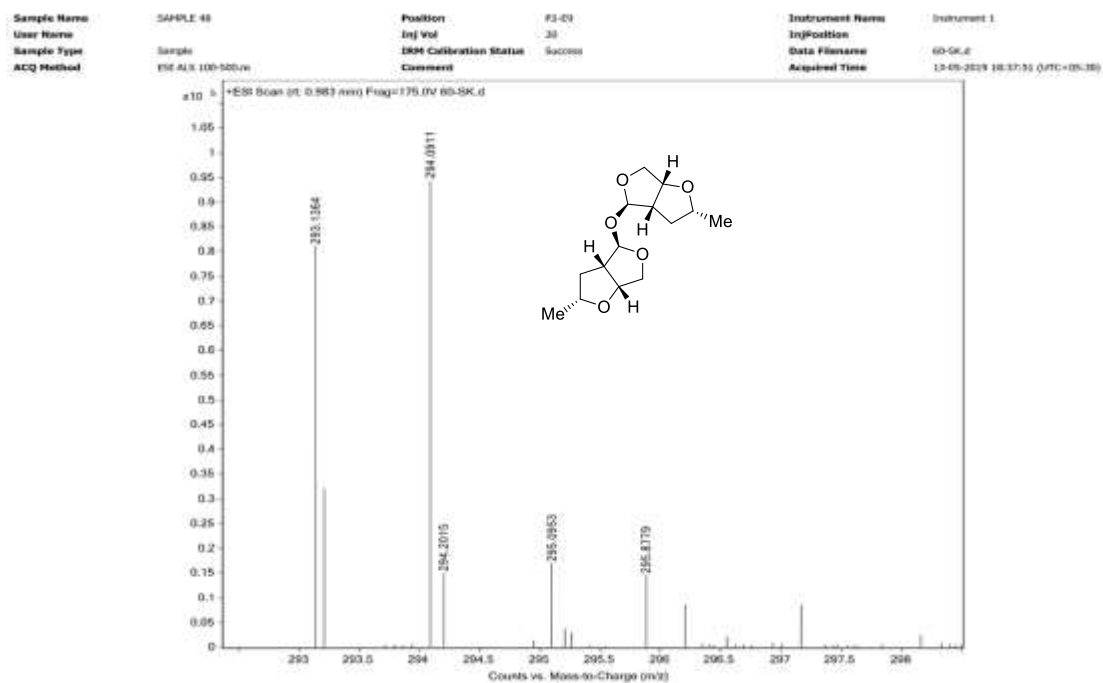

## HRMS spectrum of **4k**

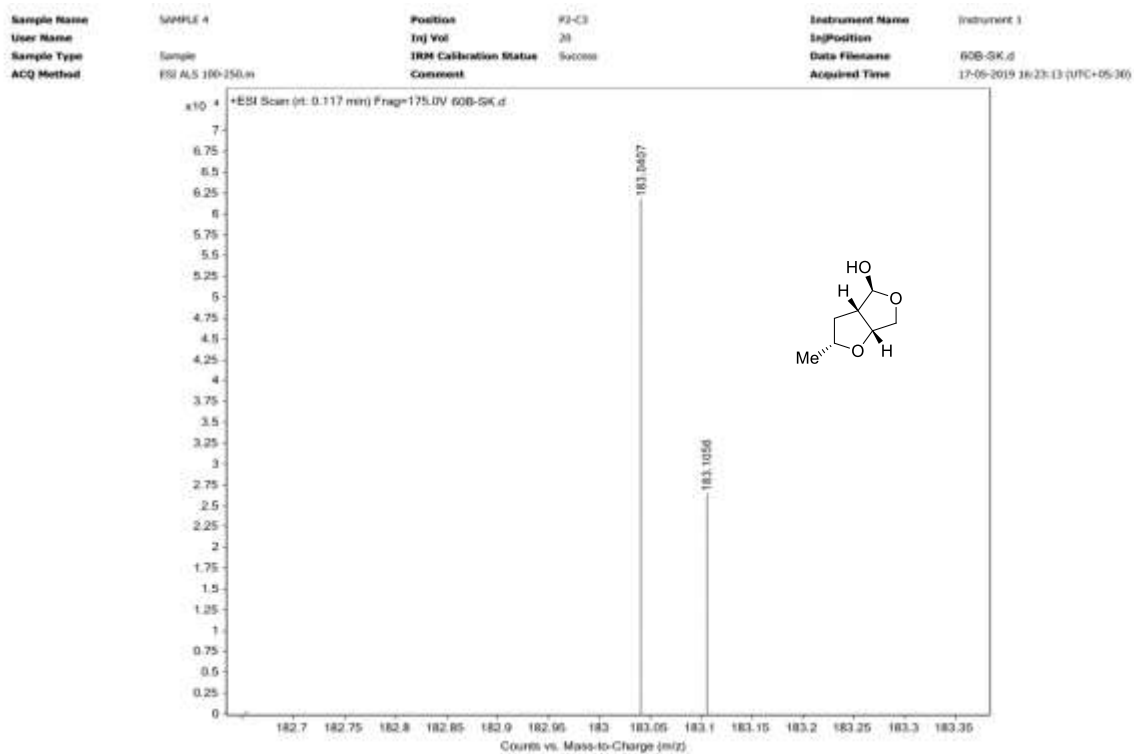

## HRMS spectrum of **31**

|             |                   |                        |         |                 |                                 |
|-------------|-------------------|------------------------|---------|-----------------|---------------------------------|
| Sample Name | SAMPLE            | Position               | P2-C11  | Instrument Name | Instrument 1                    |
| User Name   |                   | Inj Vol                | 20      | InjPosition     |                                 |
| Sample Type | Sample            | IRM Calibration Status | Success | Data Filename   | ND-P-29.d                       |
| Acq Method  | ESI ALS 200-500.n | Comment                |         | Acquired Time   | 25-04-2019 17:30:32 (UTC+05:30) |

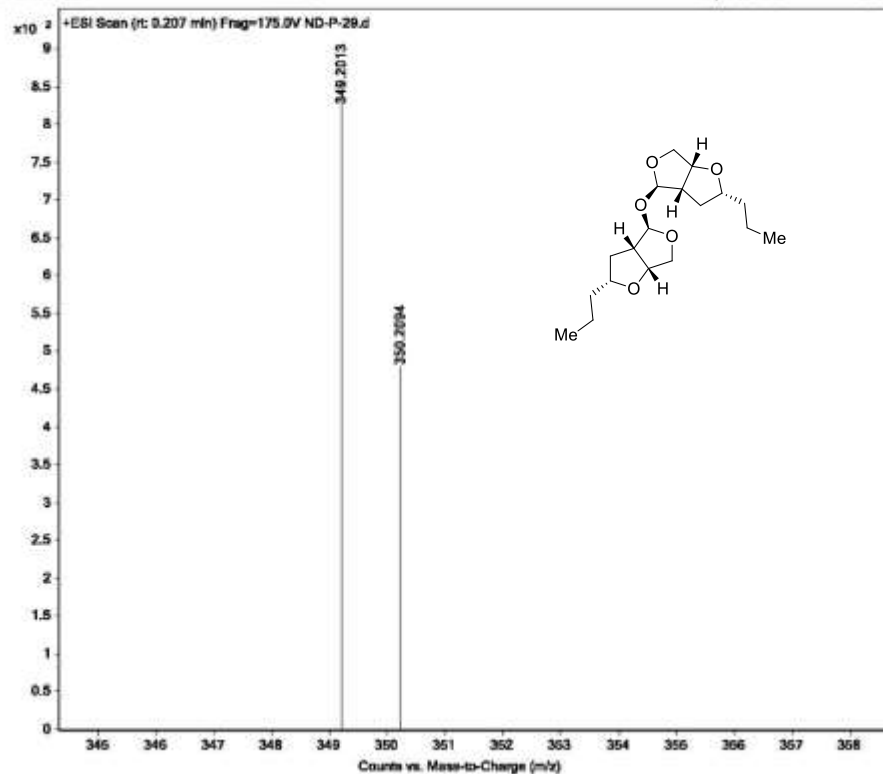

## HRMS spectrum of **41**

|             |                   |                        |         |                 |                                 |
|-------------|-------------------|------------------------|---------|-----------------|---------------------------------|
| Sample Name | SAMPLE            | Position               | P2-C10  | Instrument Name | Instrument 1                    |
| User Name   |                   | Inj Vol                | 20      | InjPosition     |                                 |
| Sample Type | Sample            | IRM Calibration Status | Success | Data Filename   | ND-P-29.d                       |
| Acq Method  | ESI ALS 100-300.n | Comment                |         | Acquired Time   | 25-04-2019 17:38:37 (UTC+05:30) |

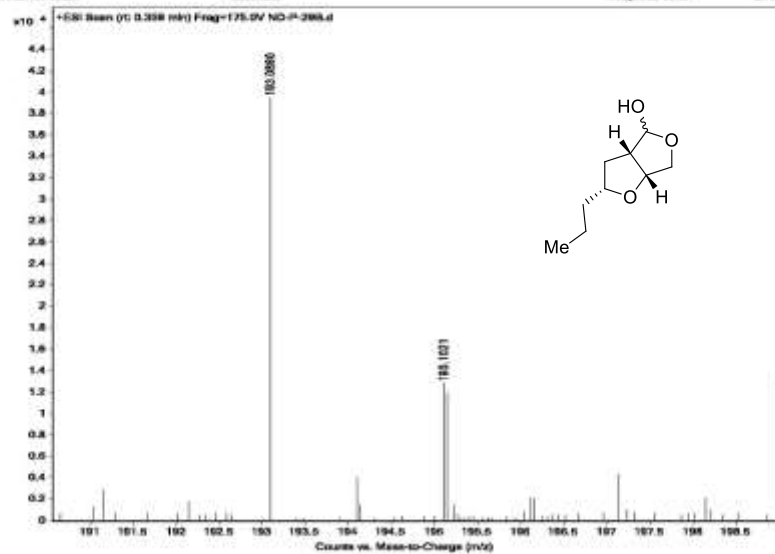

# HRMS spectrum of **4m**

|             |                   |                        |         |                 |                                 |
|-------------|-------------------|------------------------|---------|-----------------|---------------------------------|
| Sample Name | HEP-SK-P-M        | Position               | P2-06   | Instrument Name | Instrument 1                    |
| User Name   |                   | Inj Vol                | 20      | InjPosition     |                                 |
| Sample Type | Sample            | IRM Calibration Status | Success | Data Filename   | HEP-SK-P-M.d                    |
| ACQ Method  | ESI AL5 200-500.m | Comment                |         | Acquired Time   | 14-05-2019 16:09:10 (UTC+05:30) |

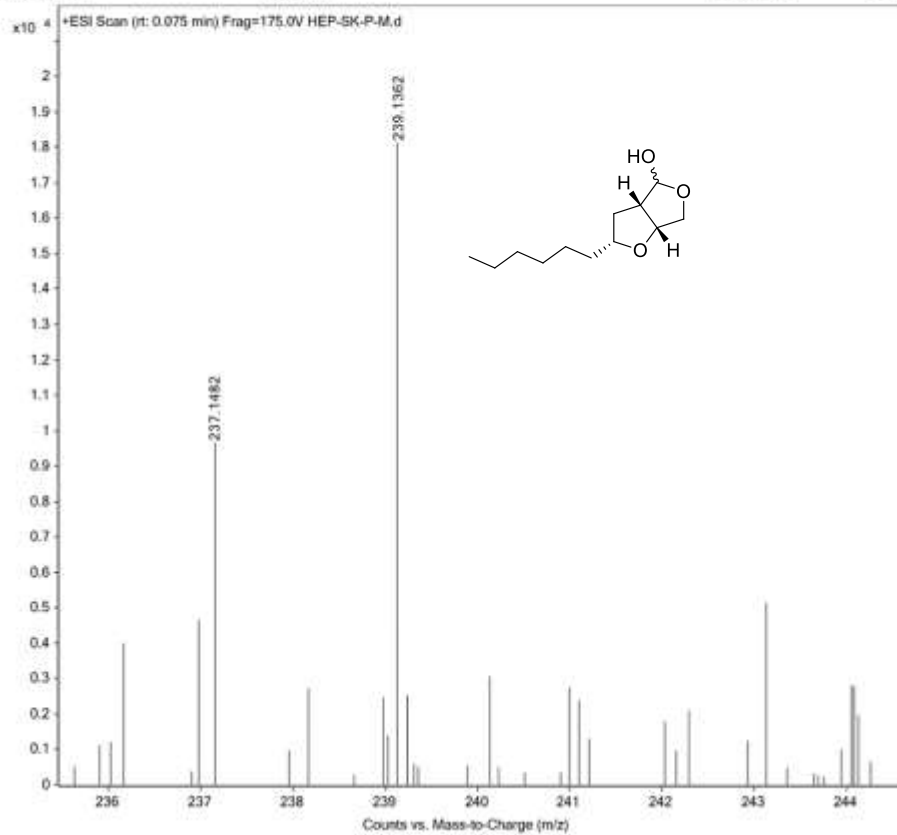

# HRMS spectrum of 5d

|             |                   |                        |         |                 |                                 |
|-------------|-------------------|------------------------|---------|-----------------|---------------------------------|
| Sample Name | SAMPLE 44         | Position               | P2-F1   | Instrument Name | Instrument 1                    |
| User Name   |                   | Inj Vol                | 20      | InjPosition     |                                 |
| Sample Type | Sample            | IRM Calibration Status | Success | Data Filename   | NBA.d                           |
| ACQ Method  | ESI ALS 100-500.m | Comment                |         | Acquired Time   | 20-02-2019 16:54:18 (UTC+05:30) |

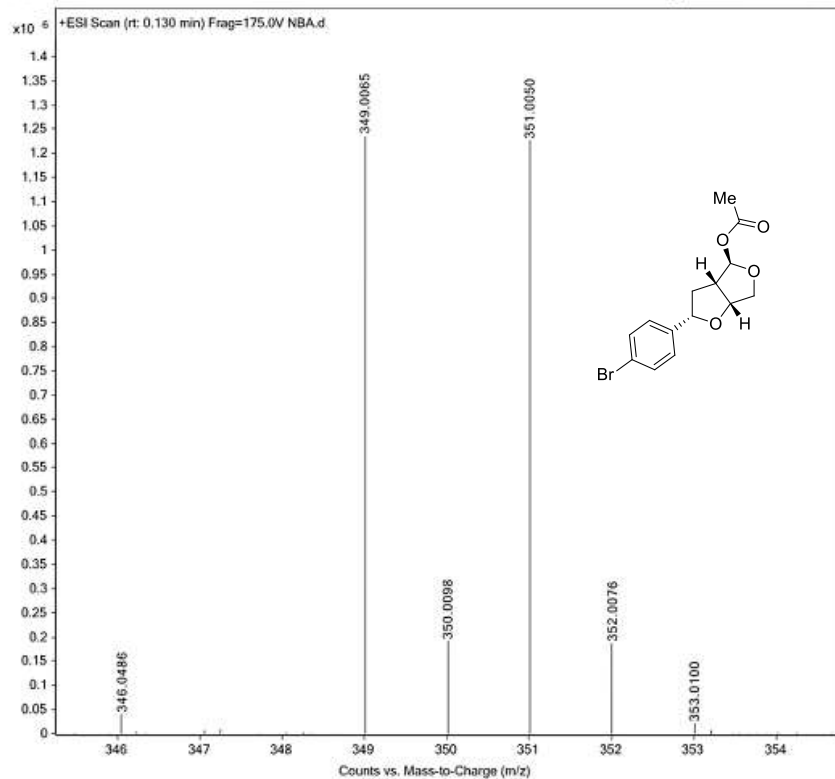

Supplement: c9ob01353a1.pdf [file c9ob01353a1.pdf]
