# Supplementary material for: Stereoselective synthesis of hexahydrofuro[3,4-b]furan-4-ol and its dimer via tandem Prins and pinacol rearrangement
Source: Royal Society of Chemistry journal article supplement (doi:10.1039/c9ob01353a), 2019-01-01

## Supporting Information for publication

### Stereoselective Synthesis of Hexahydrofuro[3,4-*b*]furan-4-ol and Its Dimer via Tandem Prins and Pinacol Rearrangement

Sudip Shit, Namita Devi, Ngangbam Renubala Devi and Anil K Saikia\*

#### Contents:

|                                                                                                                            |         |
|----------------------------------------------------------------------------------------------------------------------------|---------|
| 1. <sup>1</sup> H and <sup>13</sup> C NMR spectra of all new compounds, <sup>19</sup> F NMR of <b>3e-f</b> and <b>4e-f</b> | S2-S30  |
| 2. Crude <sup>1</sup> H spectrum of compound <b>4k</b>                                                                     | S31     |
| 3. 2D COSY and NOESY NMR of compound <b>4d</b>                                                                             | S32     |
| 2. The crystal parameters and ORTEP diagram of compound <b>3d</b> and <b>4d</b>                                            | S32-S36 |

# $^1\text{H}$ and $^{13}\text{C}$ NMR spectra of **3a**

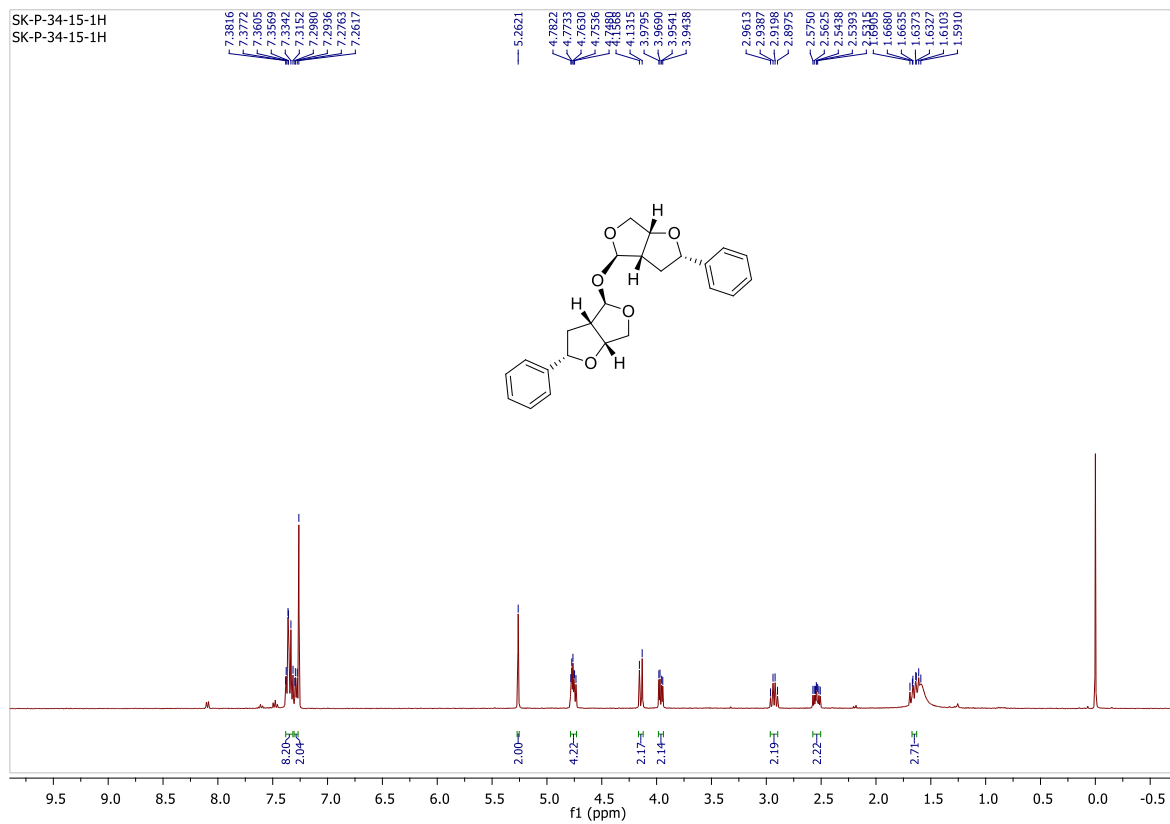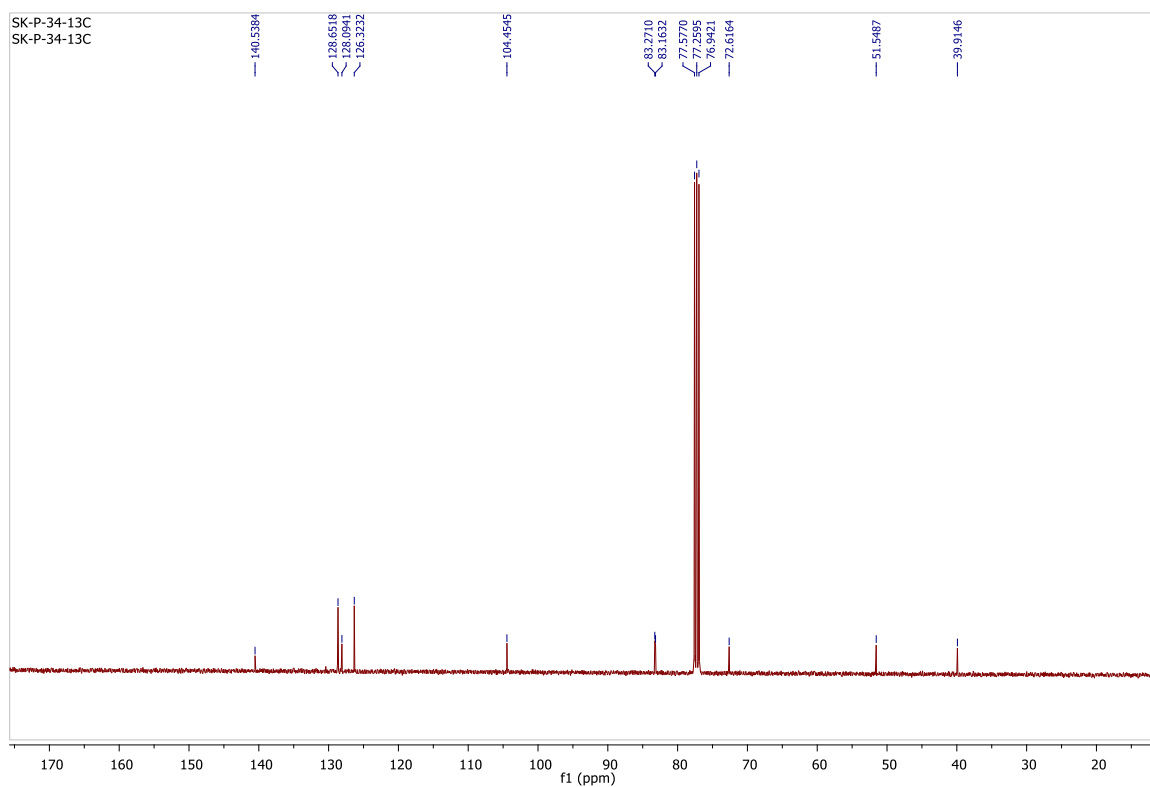

# <sup>1</sup>H and <sup>13</sup>C NMR spectra of **4a**

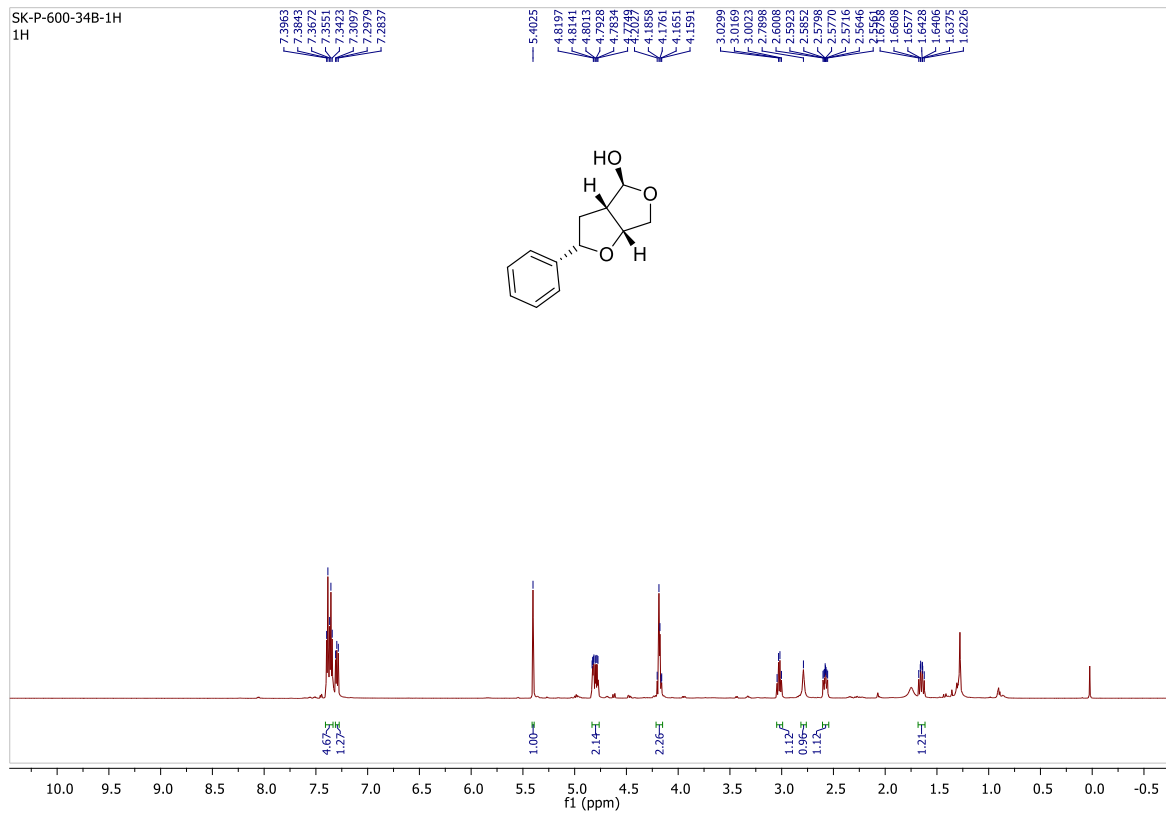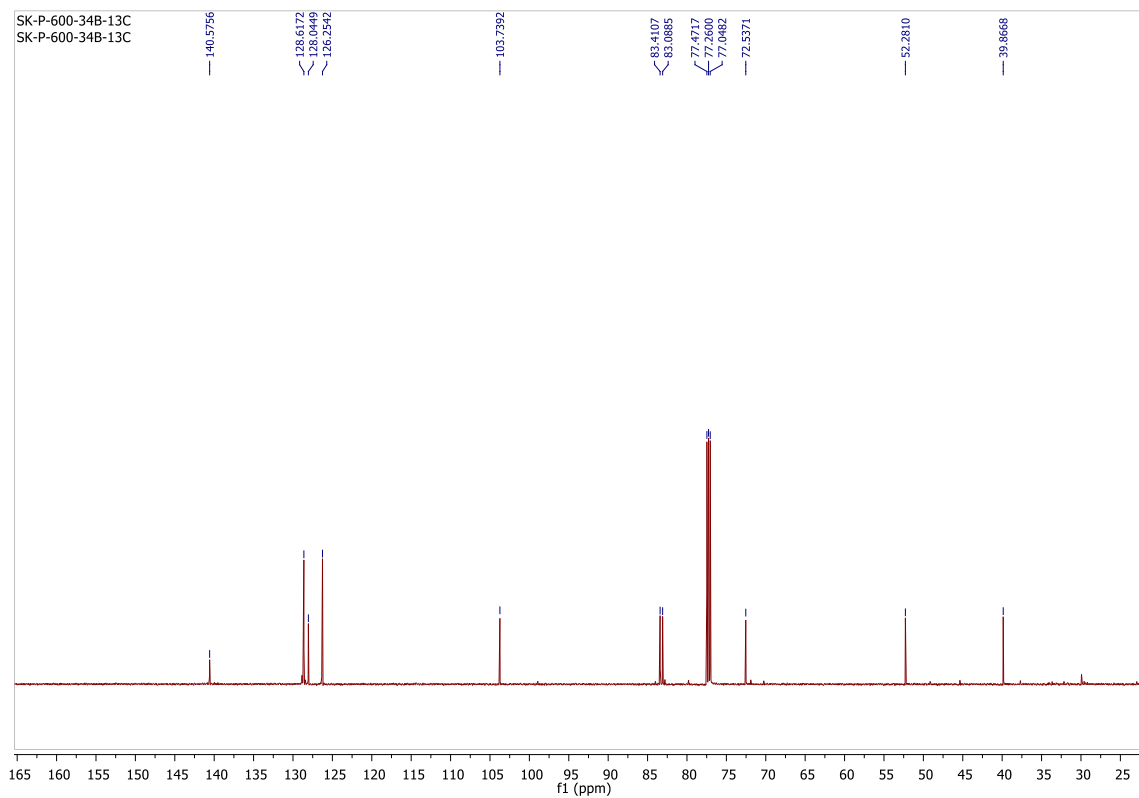

# <sup>1</sup>H and <sup>13</sup>C NMR spectra of **3b**

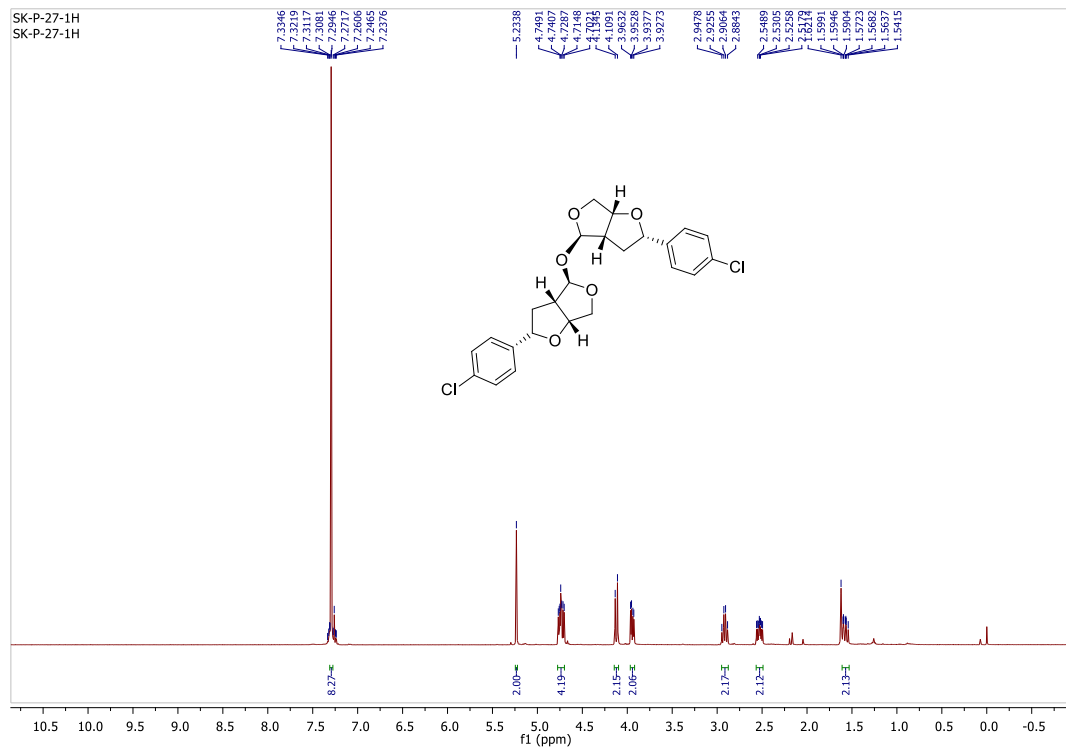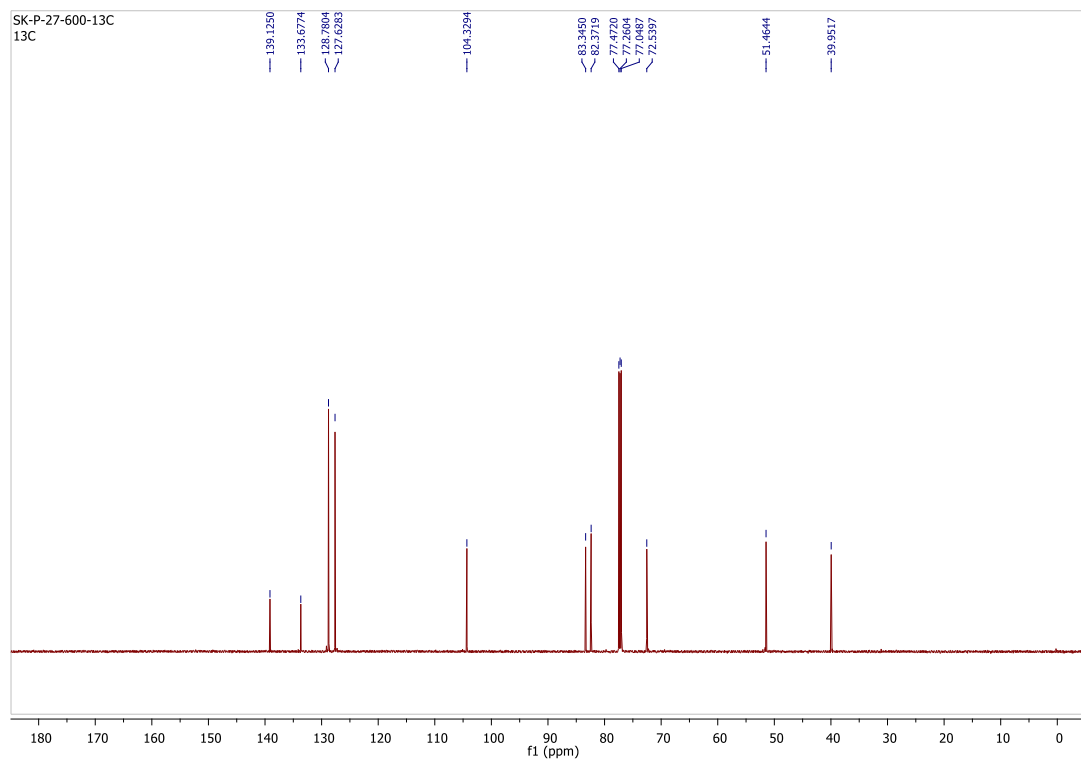

# <sup>1</sup>H and <sup>13</sup>C NMR spectra of **4b**

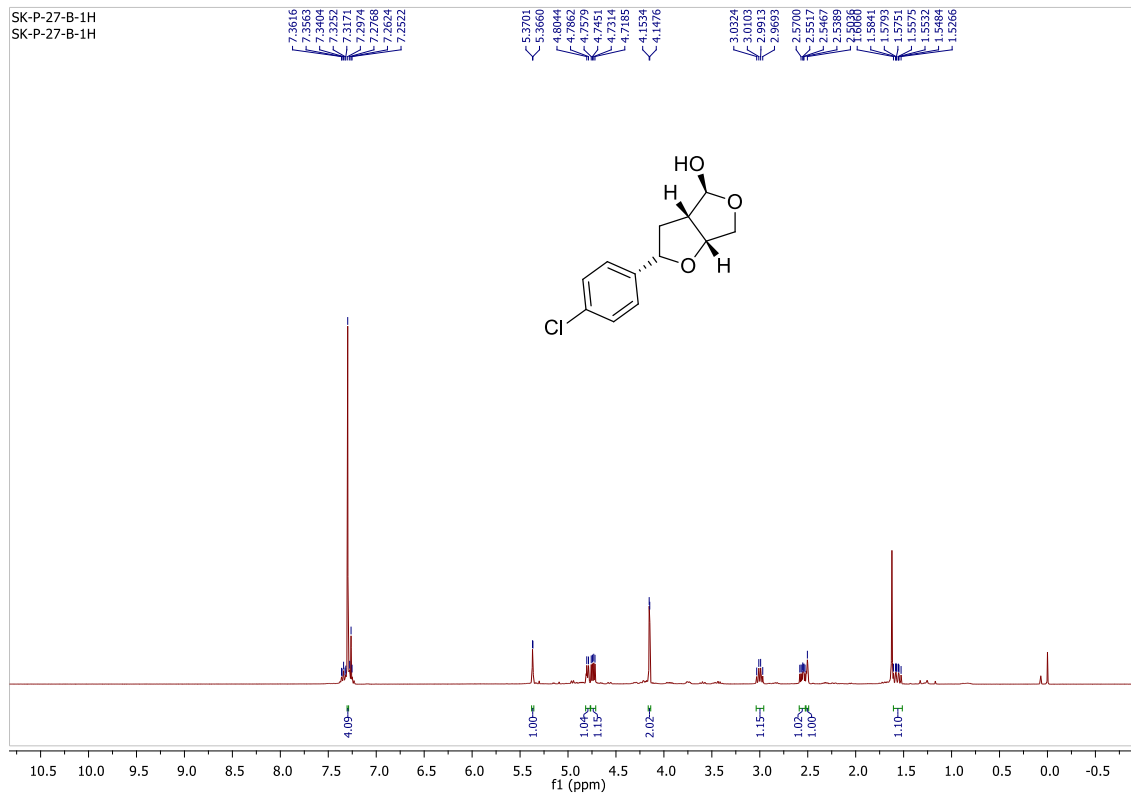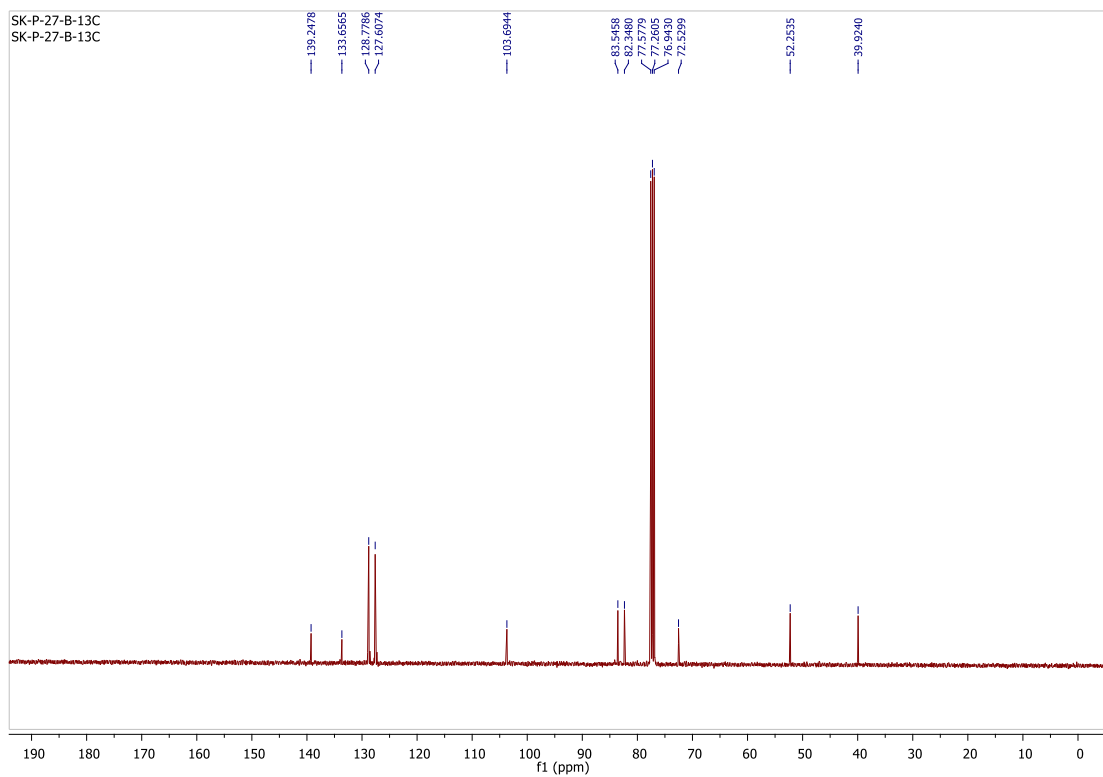

# $^1\text{H}$ and $^{13}\text{C}$ NMR spectra of **3c**

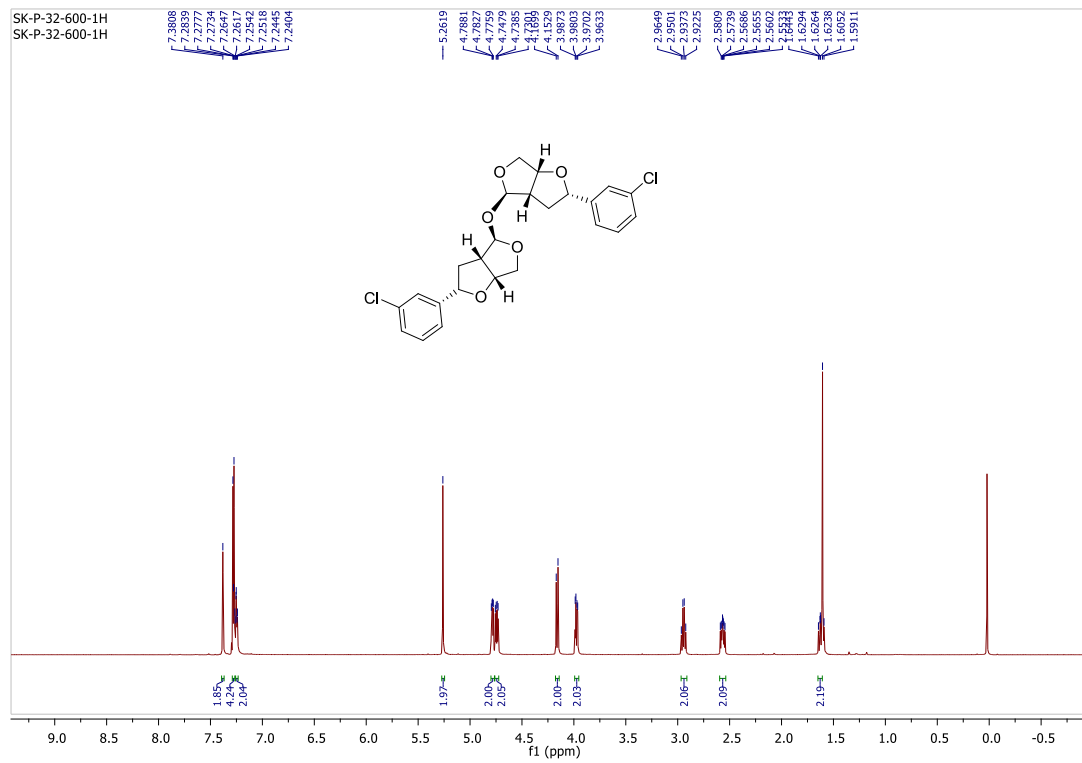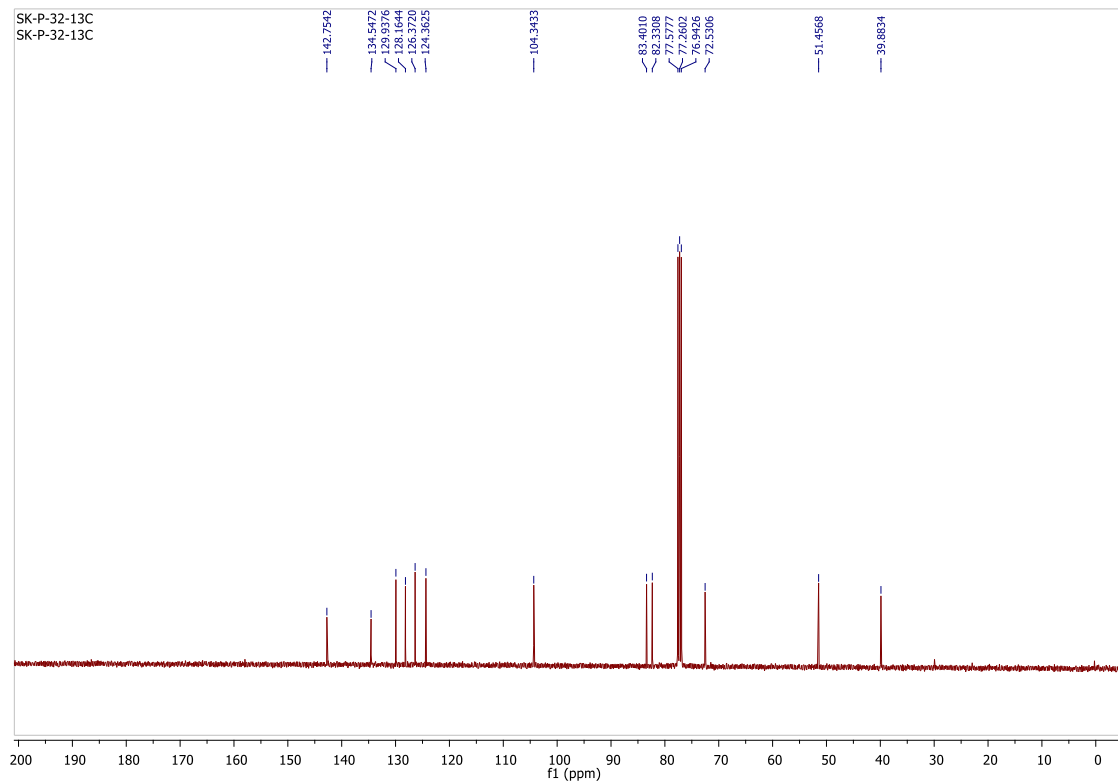

$^1\text{H}$  and  $^{13}\text{C}$  NMR spectra of **4c**

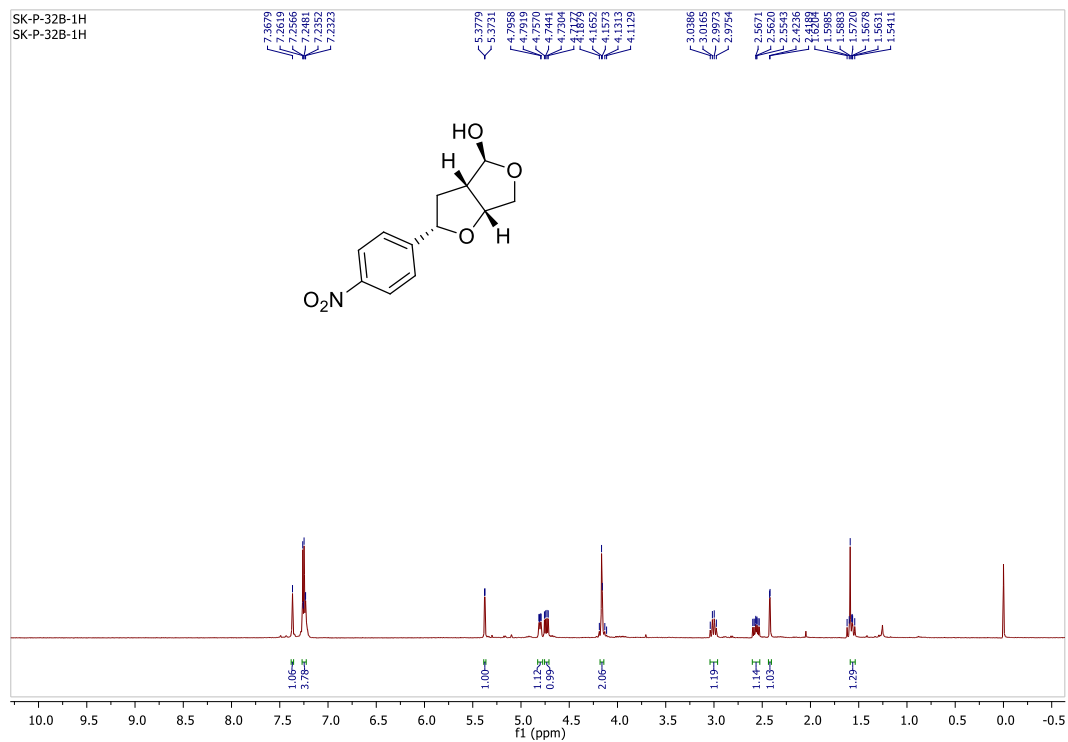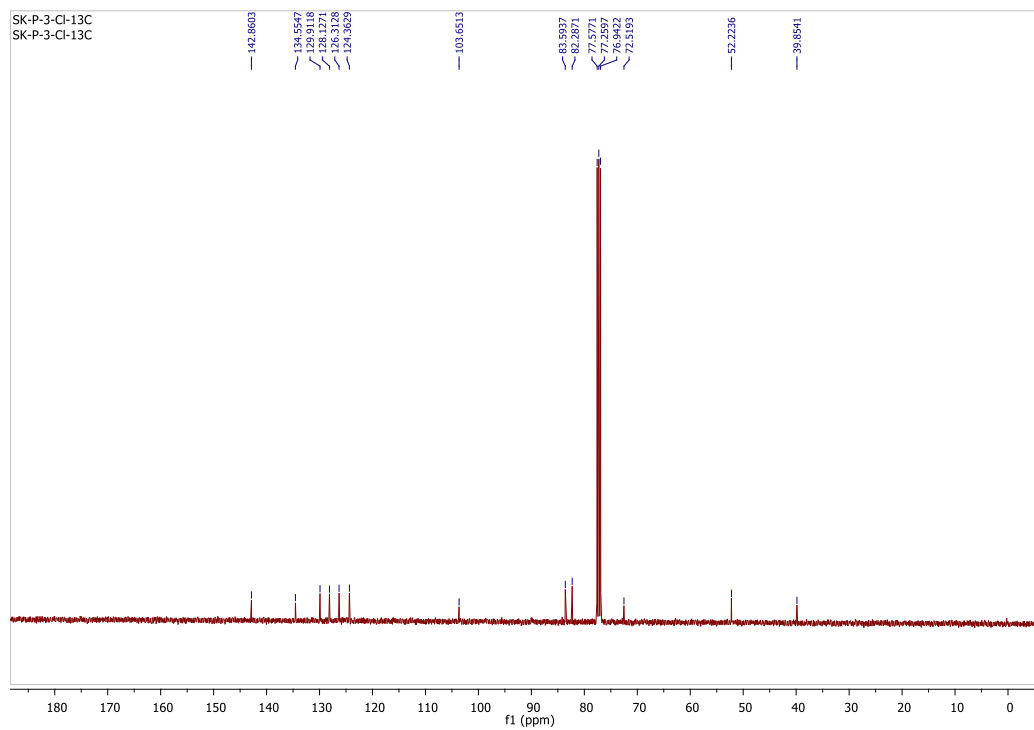

$^1\text{H}$  and  $^{13}\text{C}$  NMR spectra of **3d**

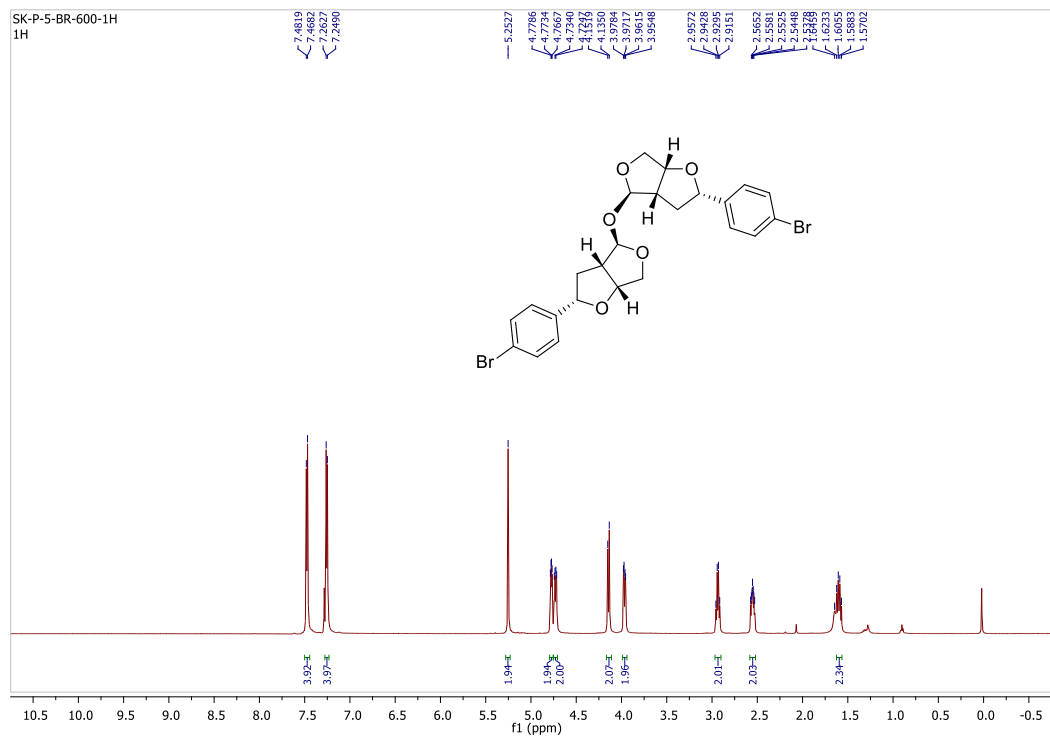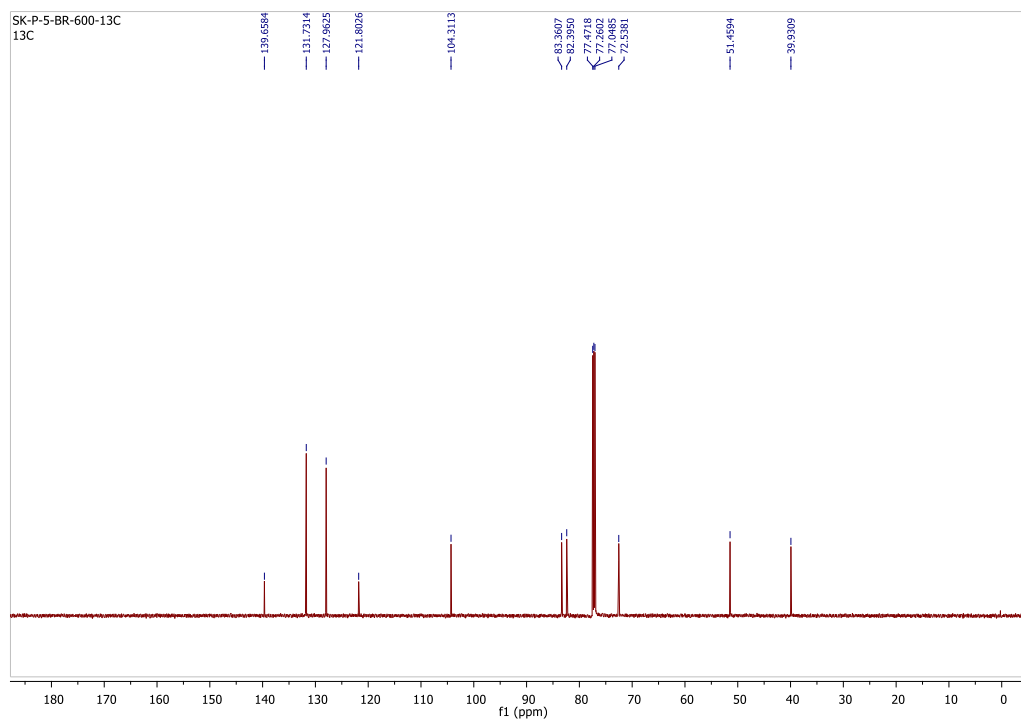



<sup>1</sup>H and <sup>13</sup>C NMR spectra of **4d**

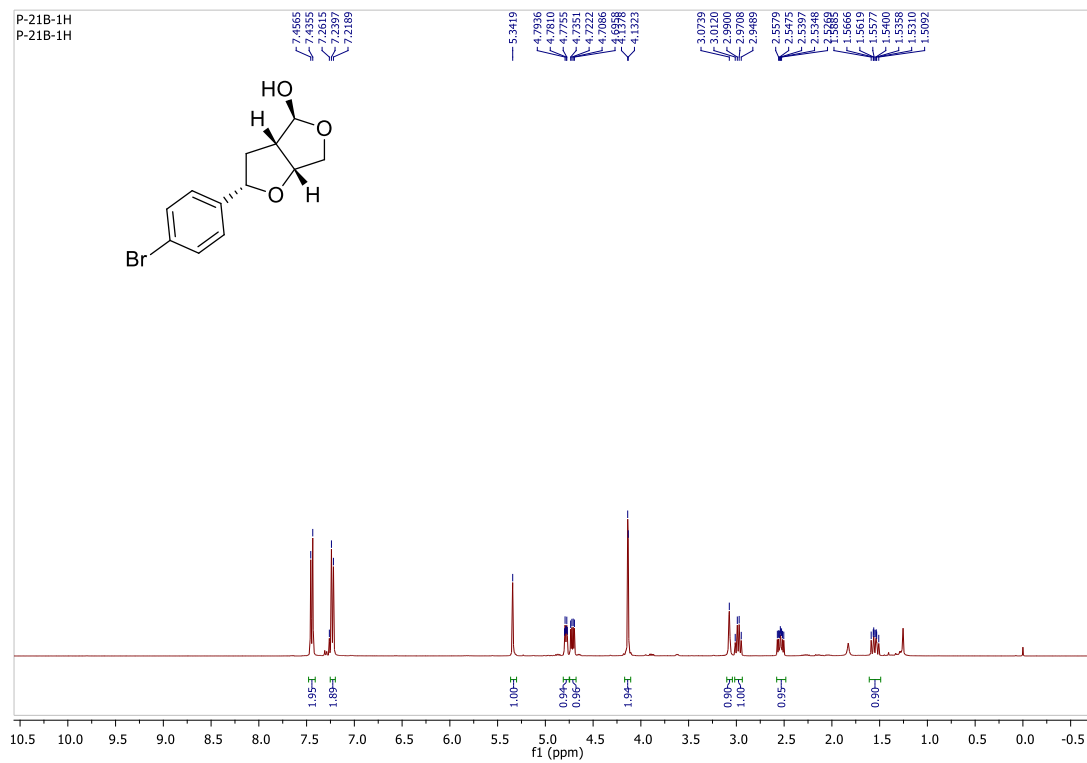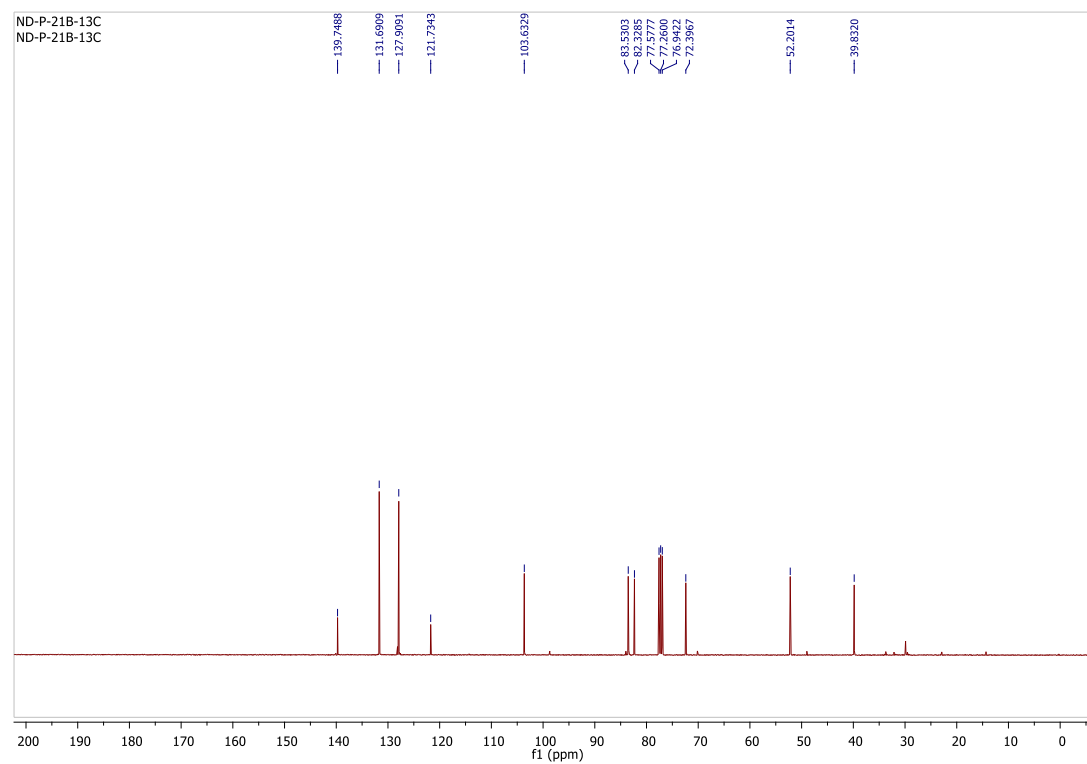

$^1\text{H}$  and  $^{13}\text{C}$  NMR spectra of **3e**

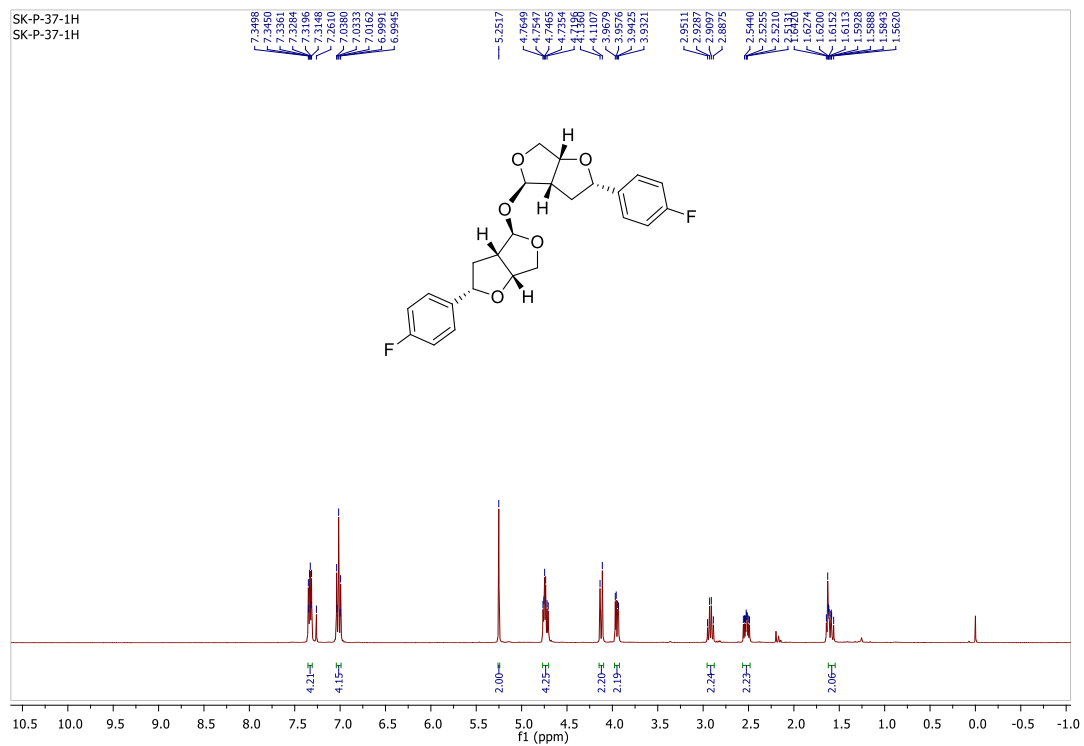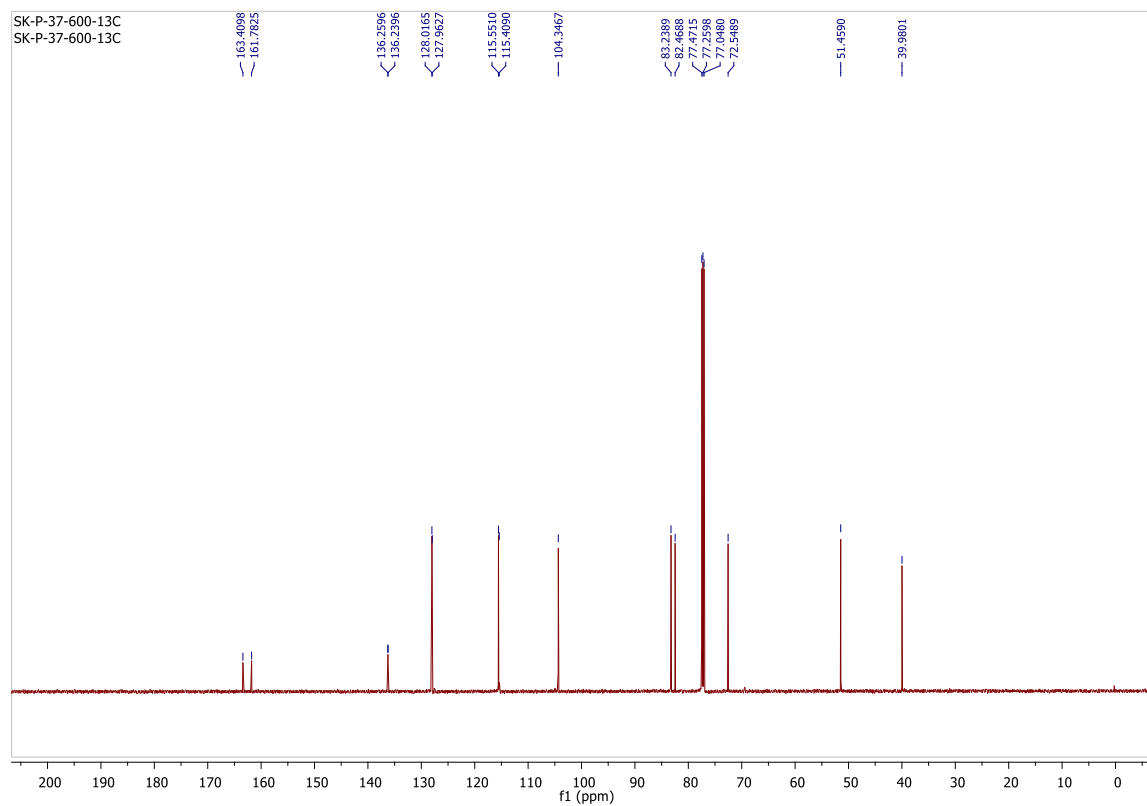

$^{19}\text{F}$  NMR spectrum of **3e**

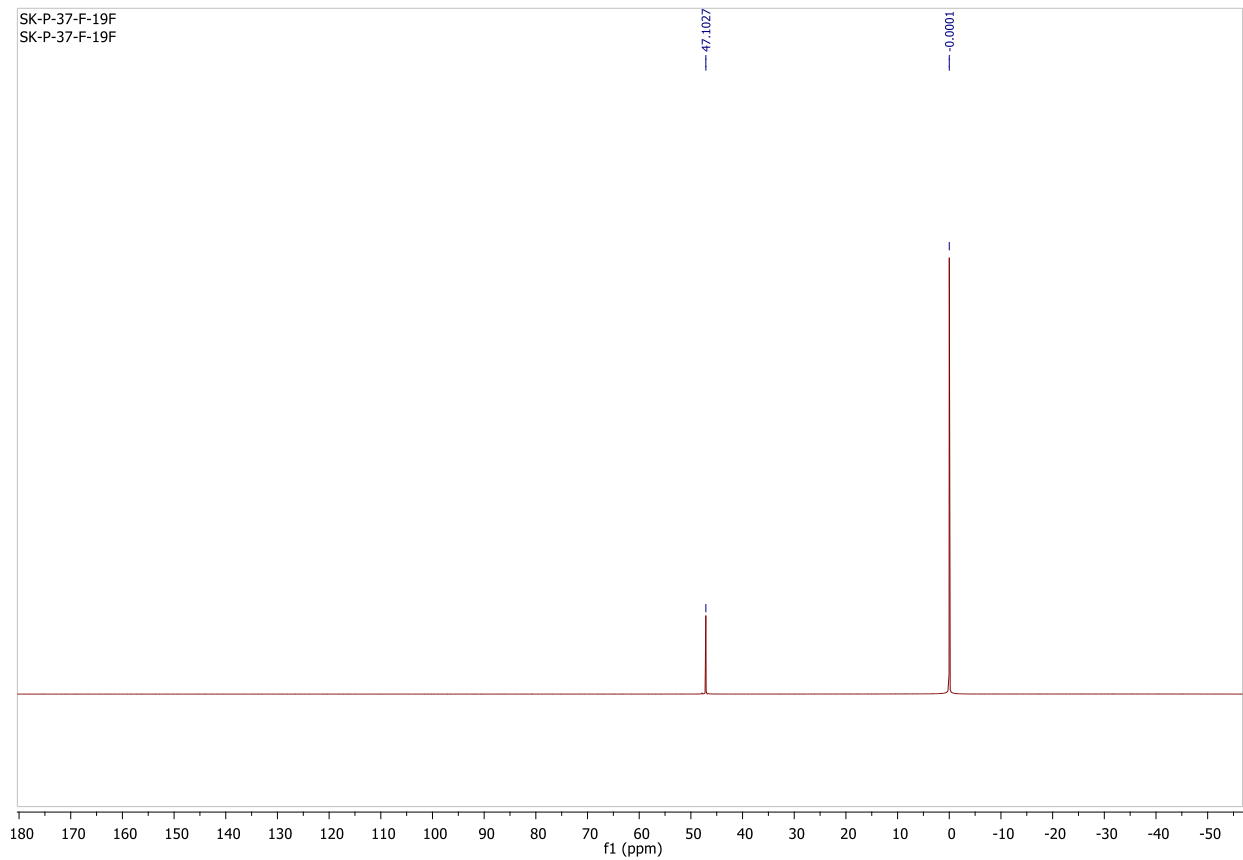

$^1\text{H}$  and  $^{13}\text{C}$  NMR spectra of **4e**

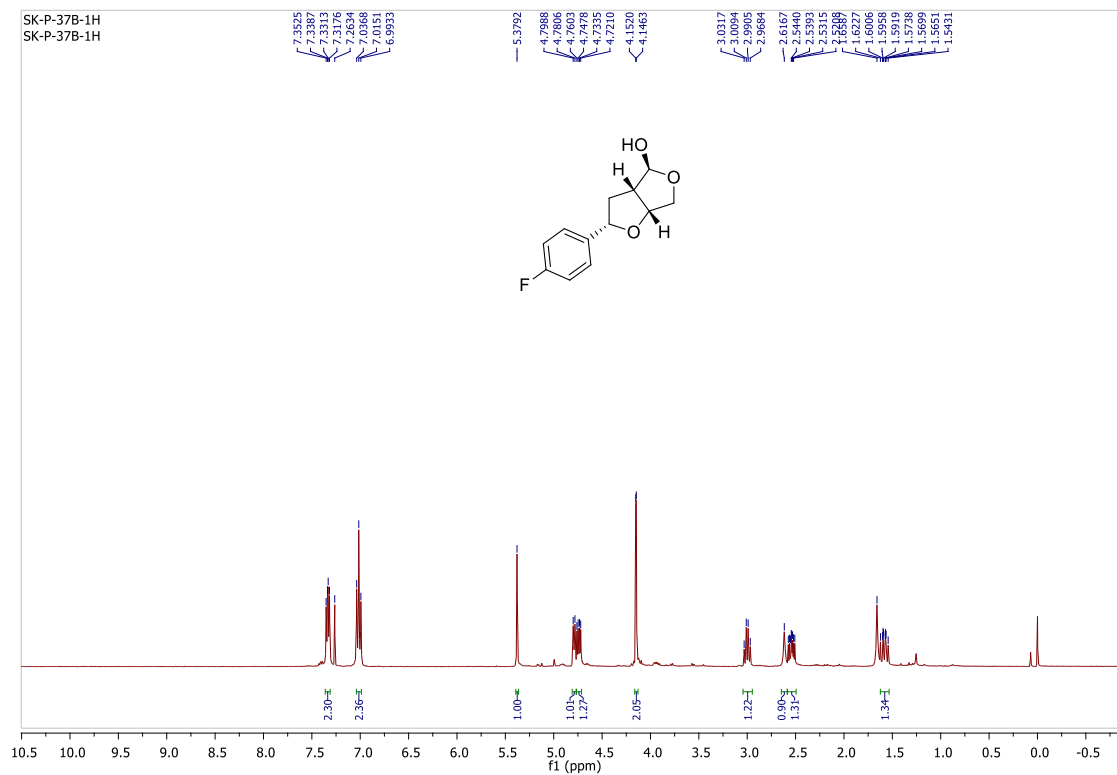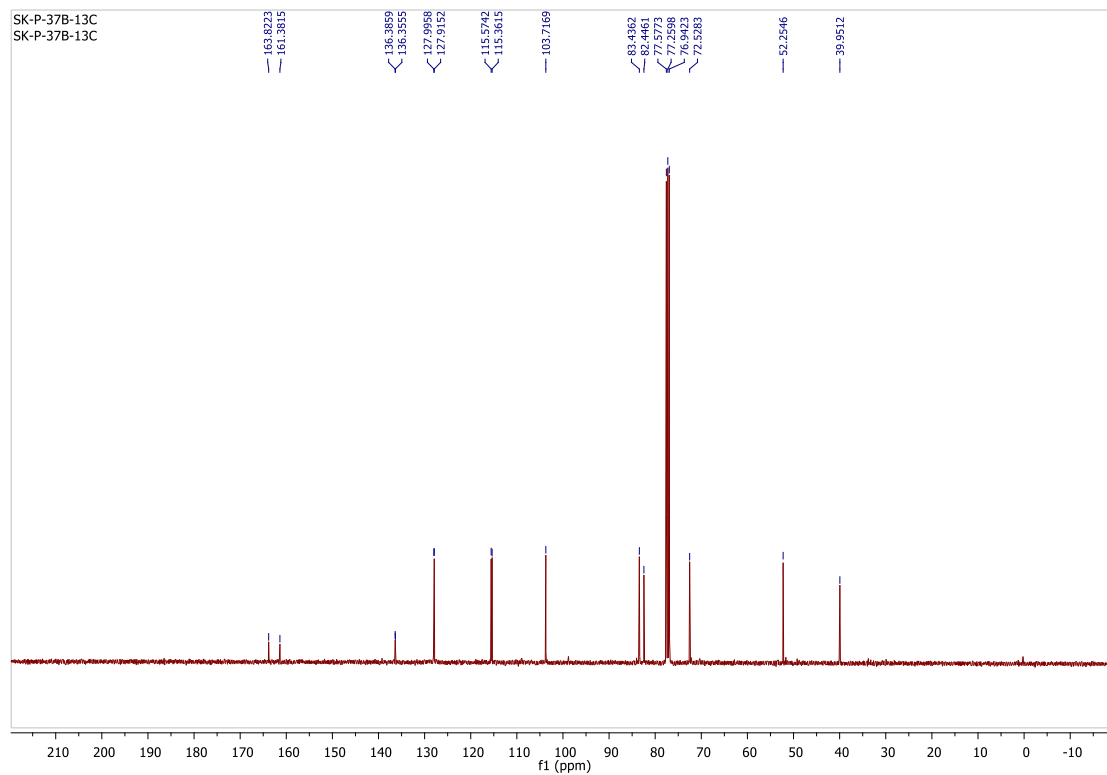

$^{19}\text{F}$  NMR spectrum of **4e**

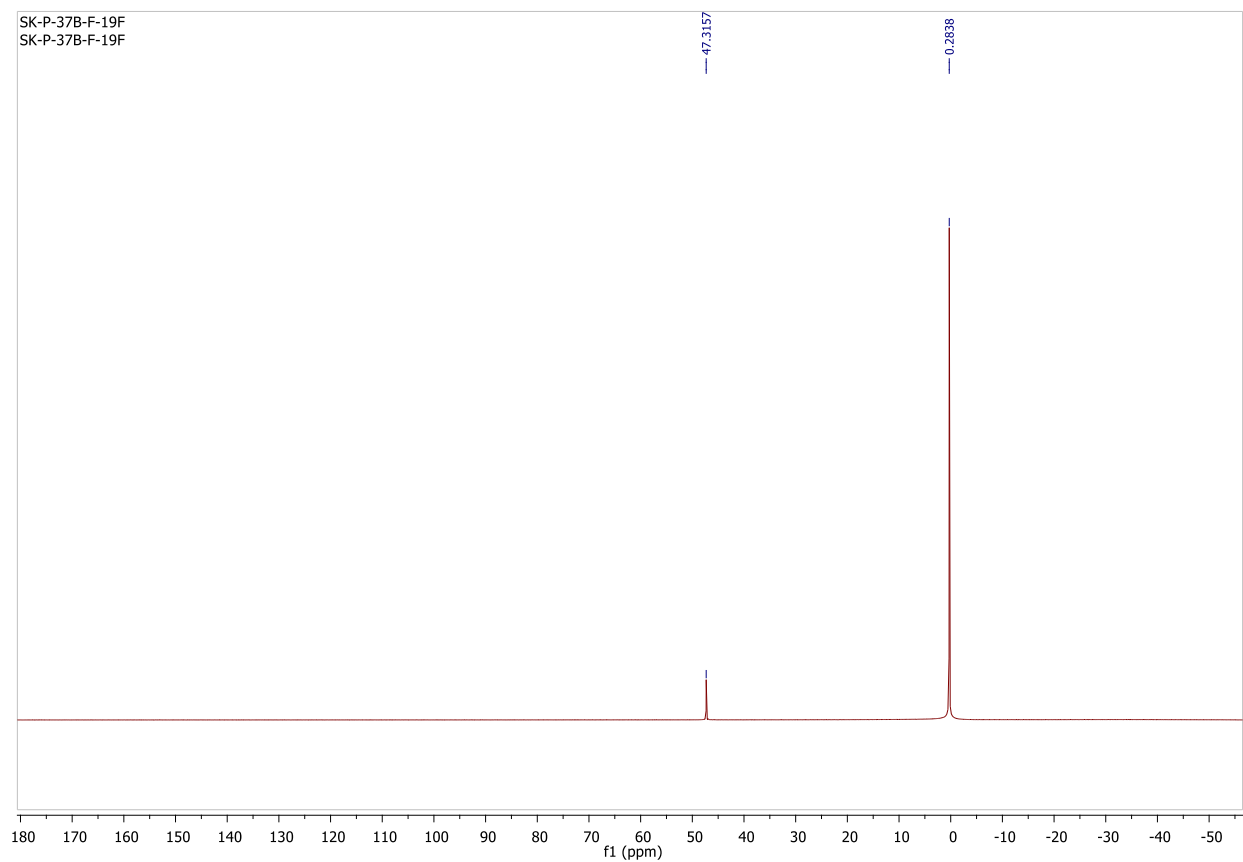

$^1\text{H}$  and  $^{13}\text{C}$  NMR spectra of **3f**

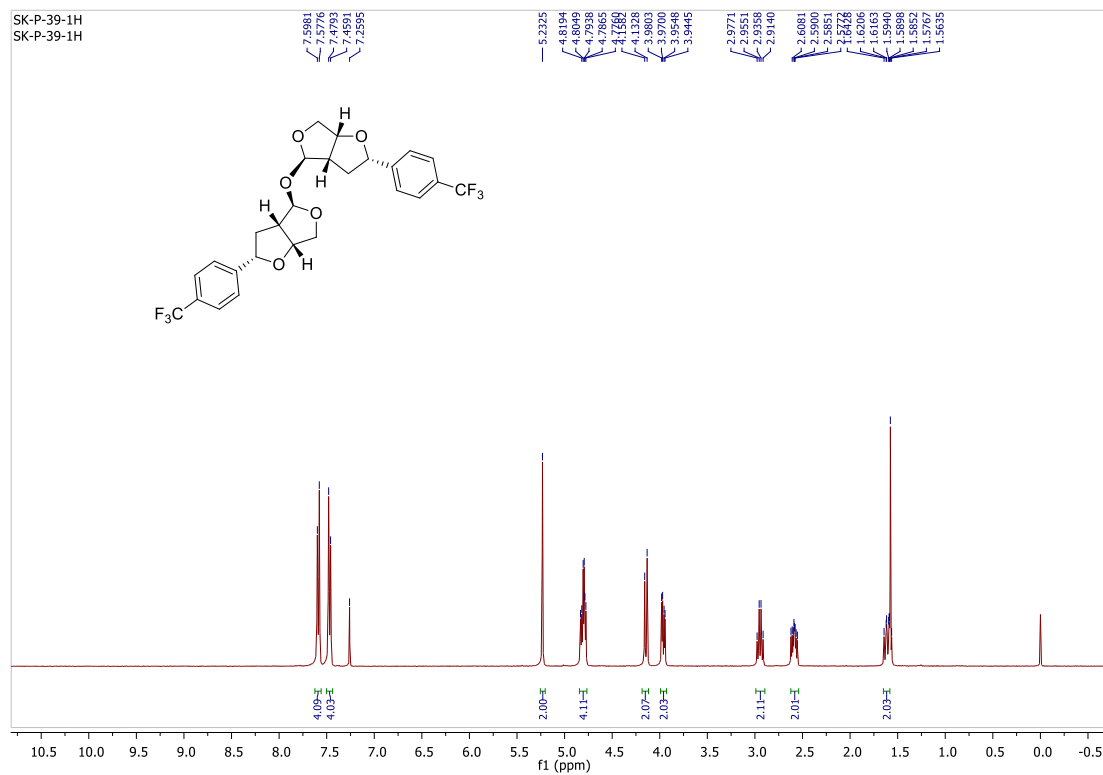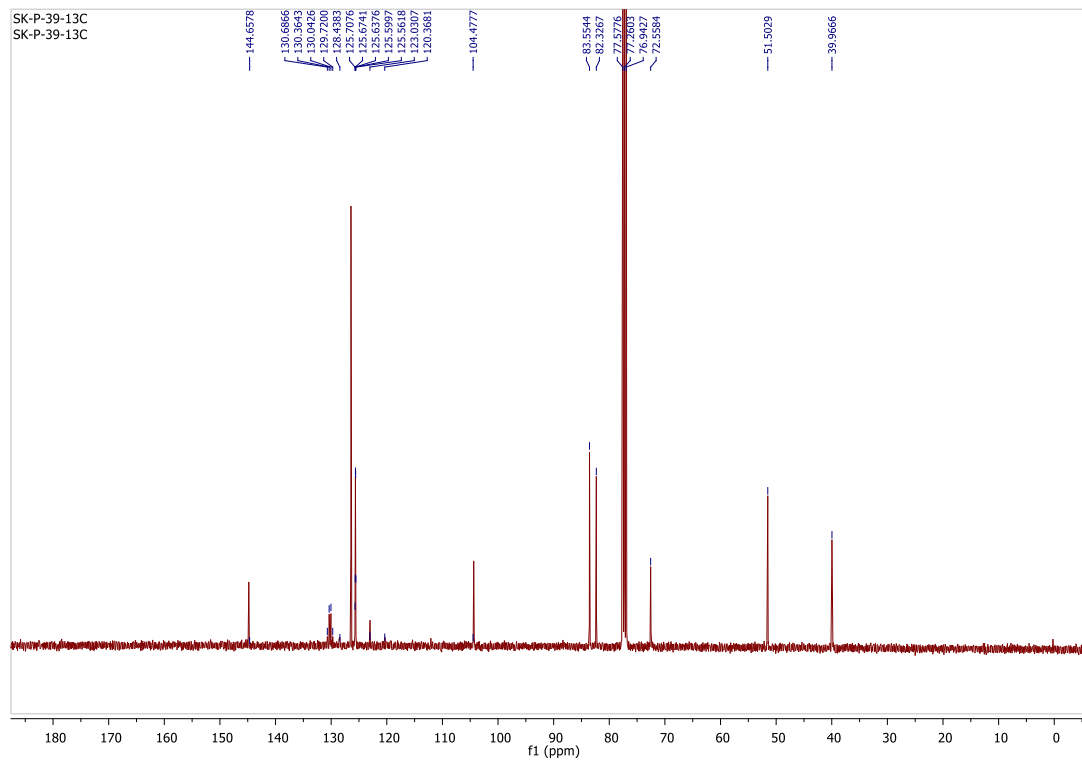

$^{19}\text{F}$  NMR spectrum of **3f**

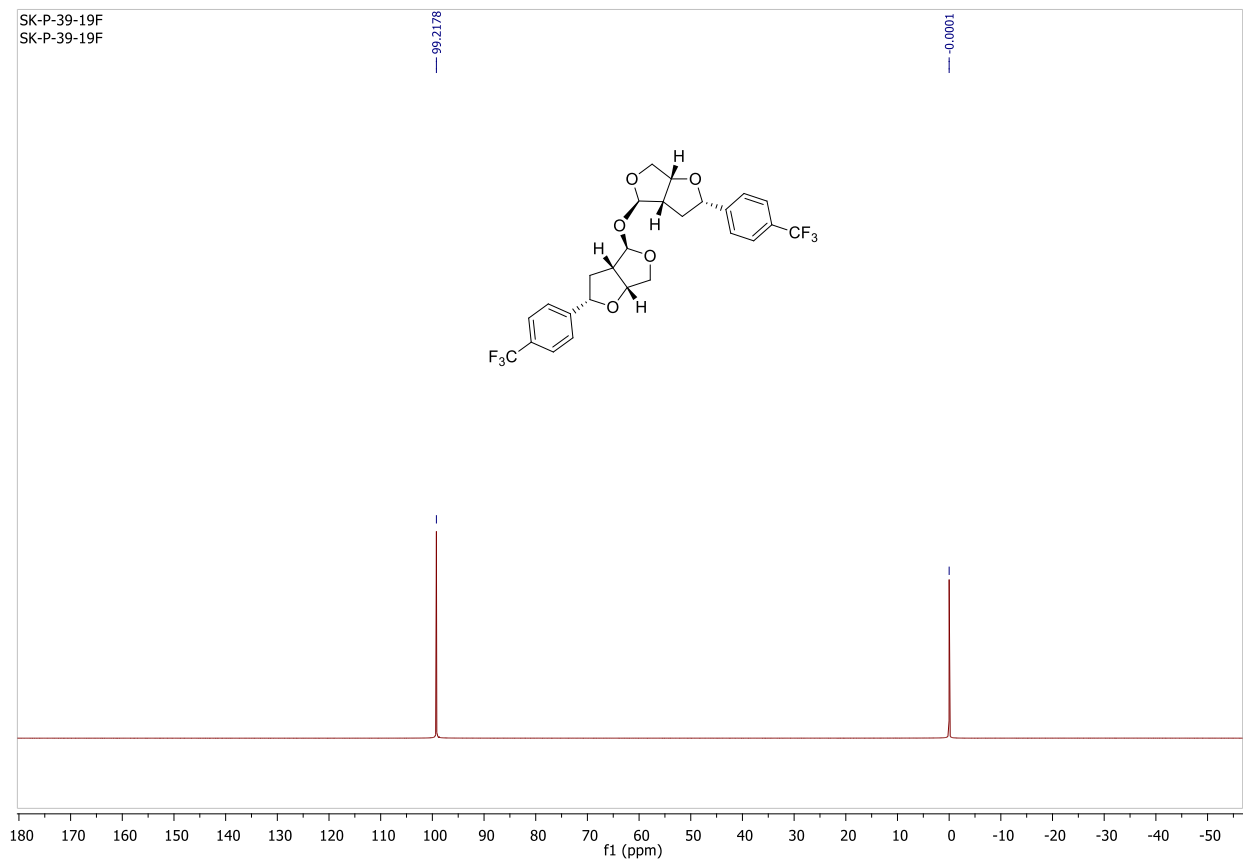

# $^1\text{H}$ and $^{13}\text{C}$ NMR spectra of **4f**

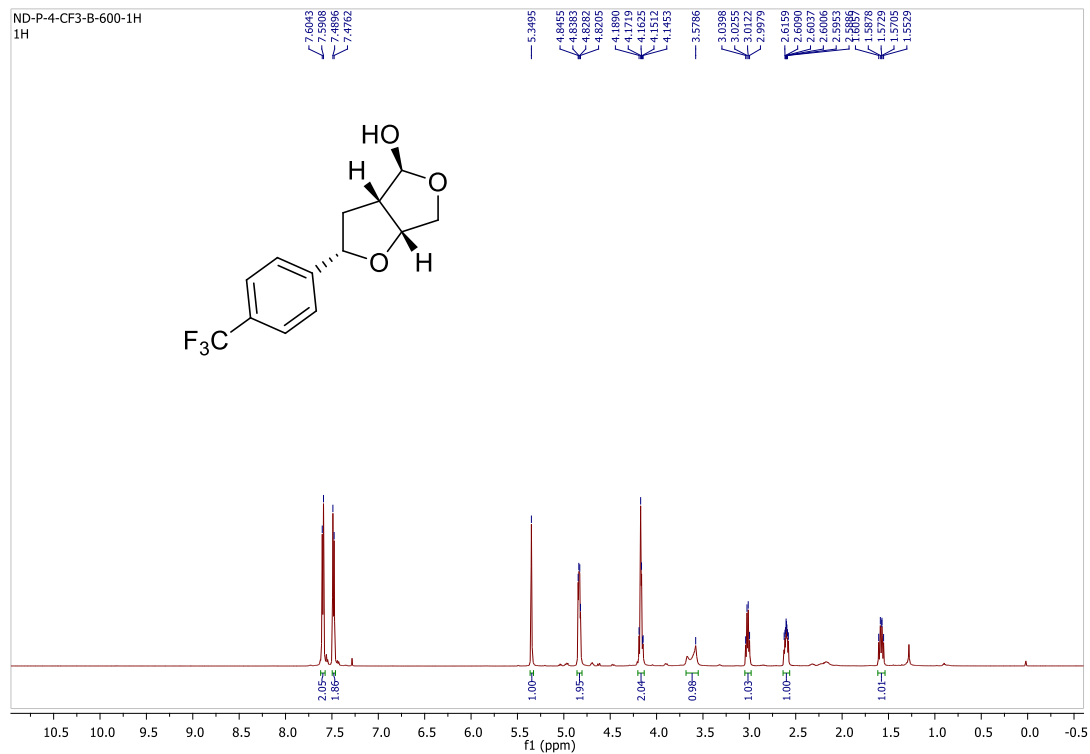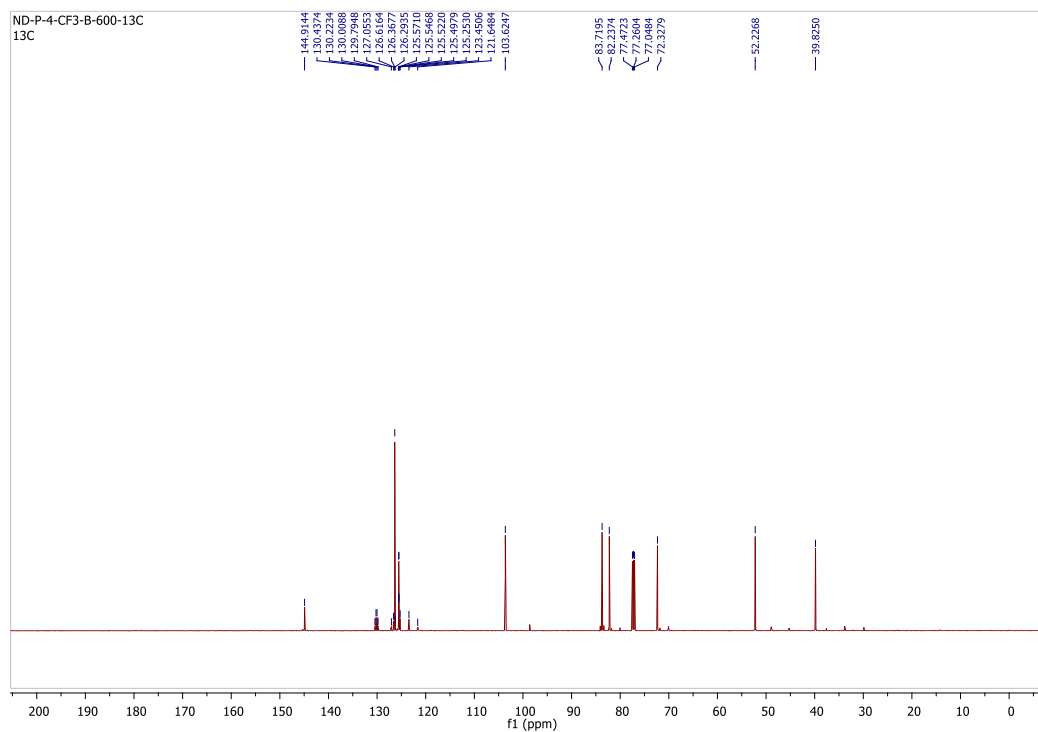



$^{19}\text{F}$  NMR spectrum of **4f**

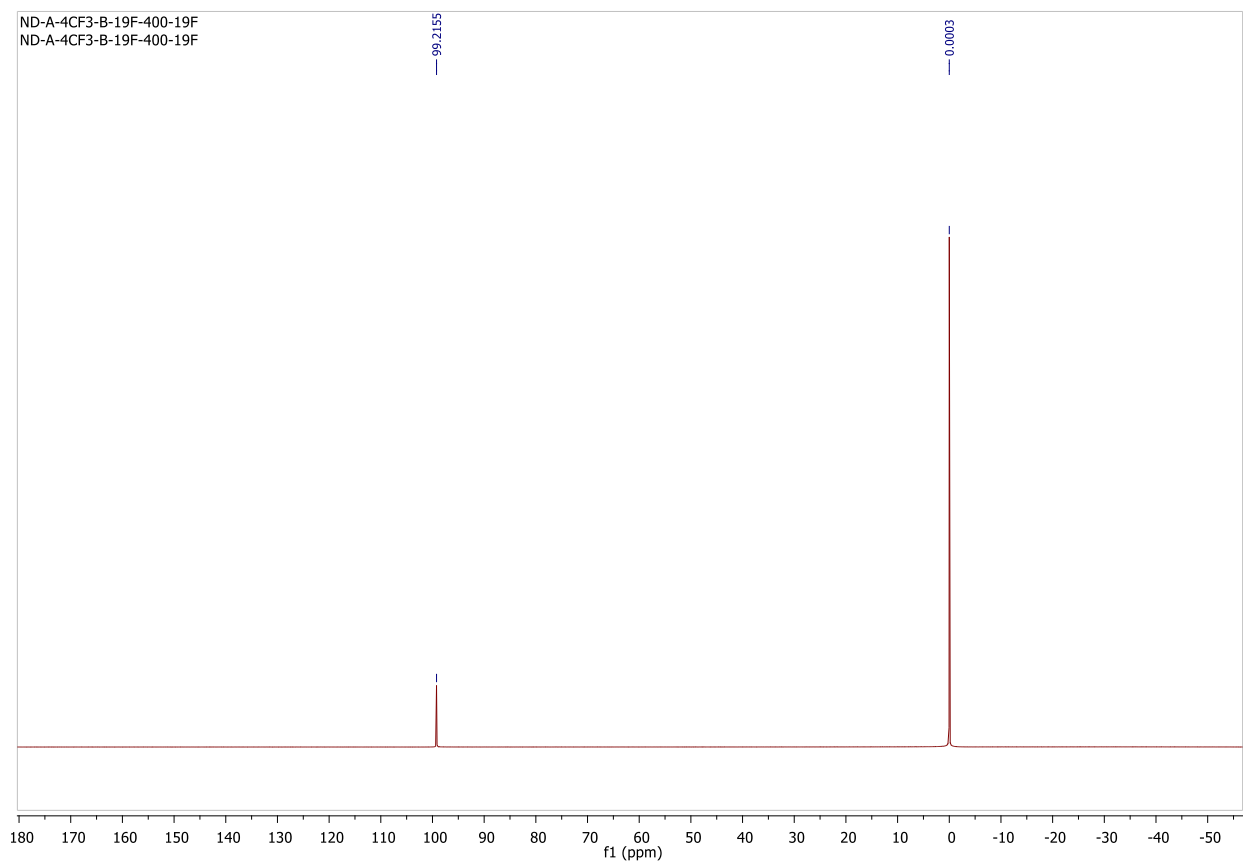

$^1\text{H}$  and  $^{13}\text{C}$  NMR spectra of **3g**

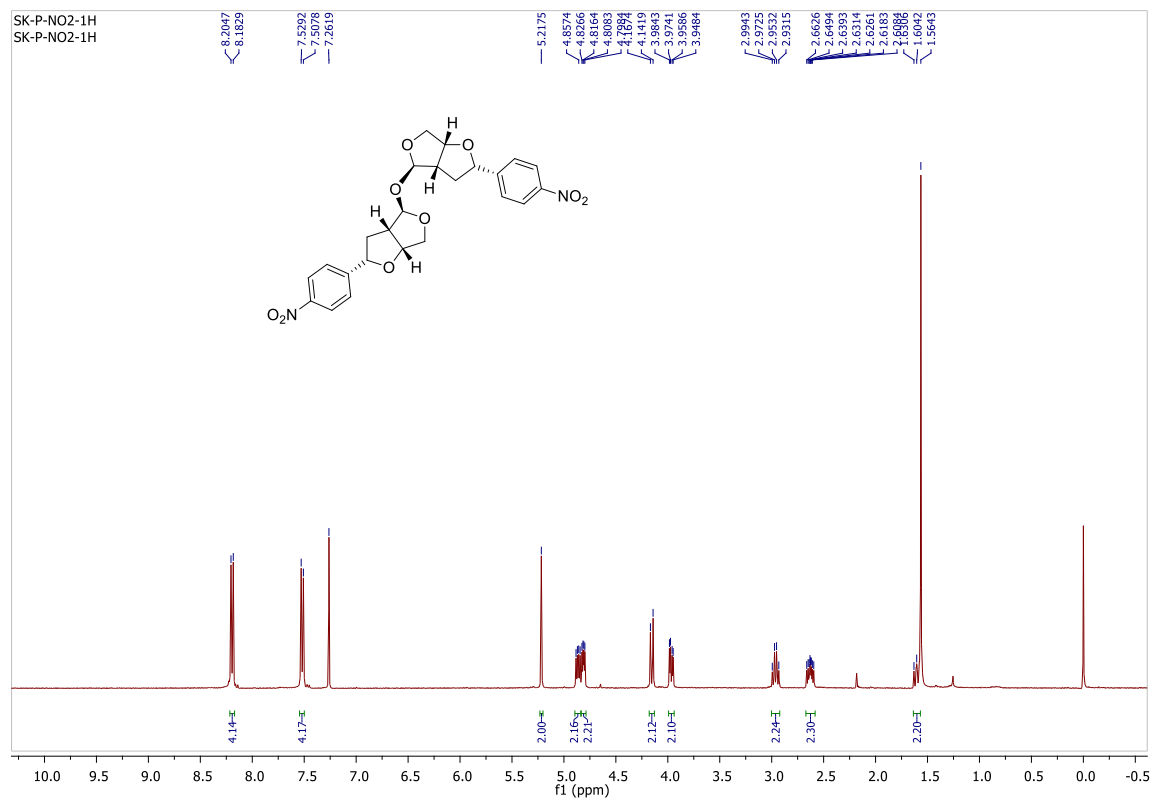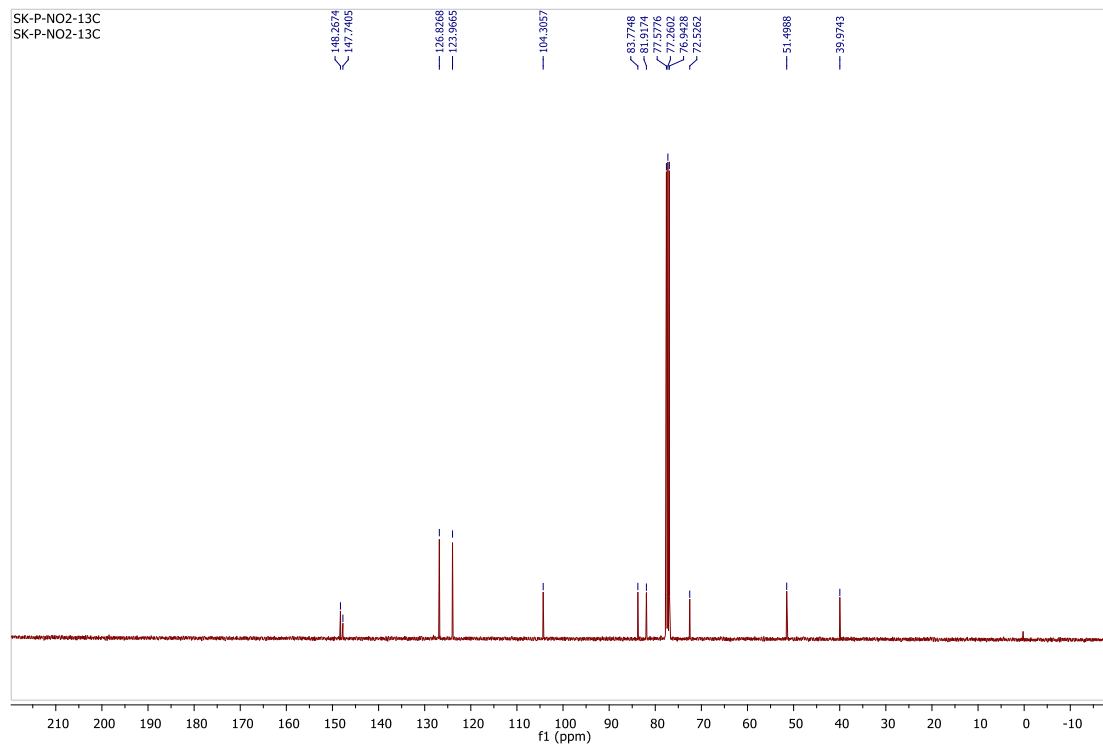

# $^1\text{H}$ and $^{13}\text{C}$ NMR spectra of **4g**

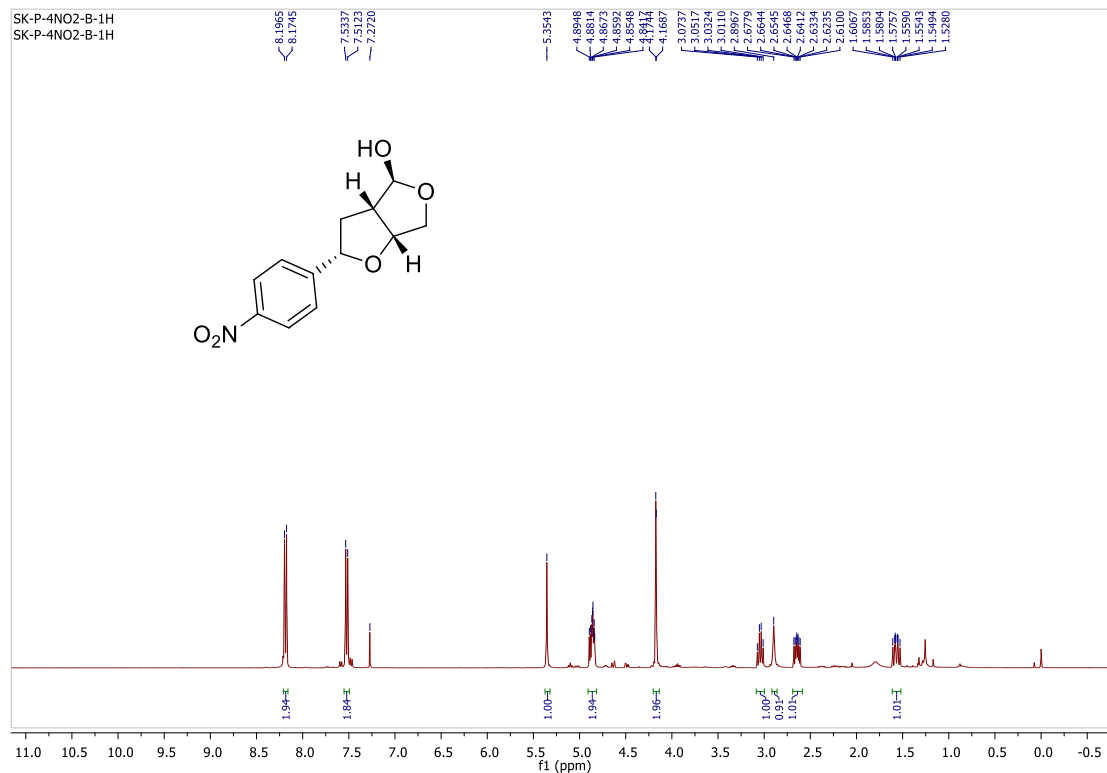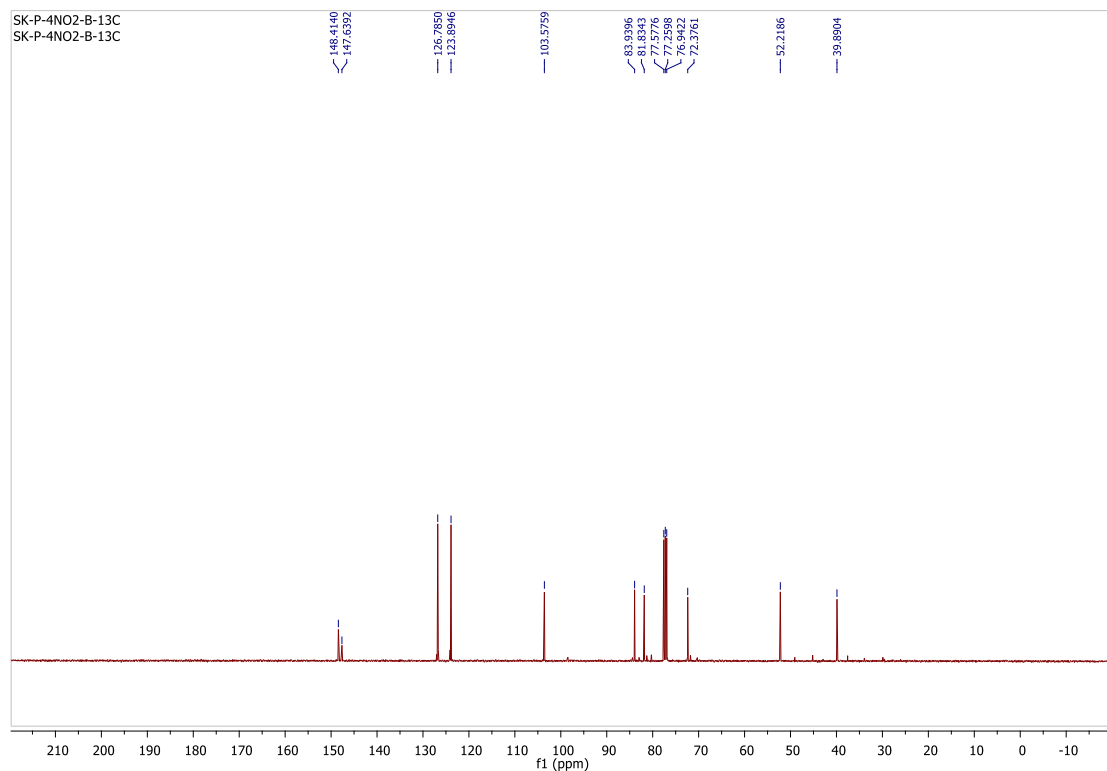

# $^1\text{H}$ and $^{13}\text{C}$ NMR spectra of **3h**

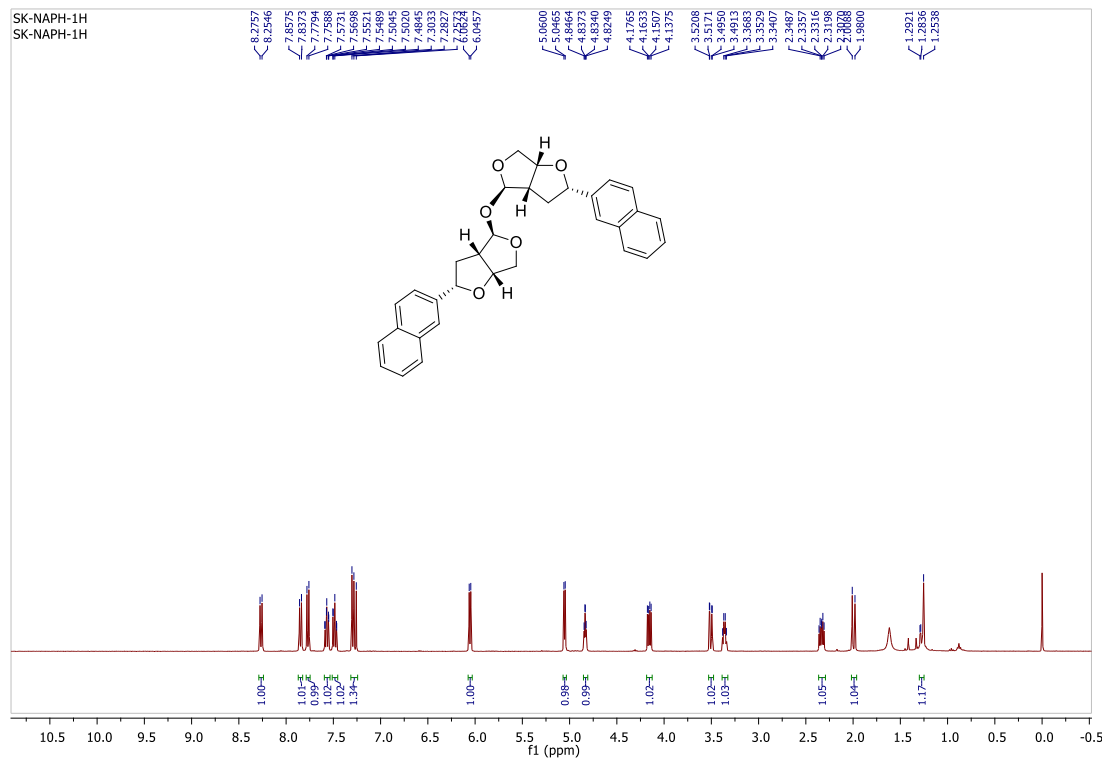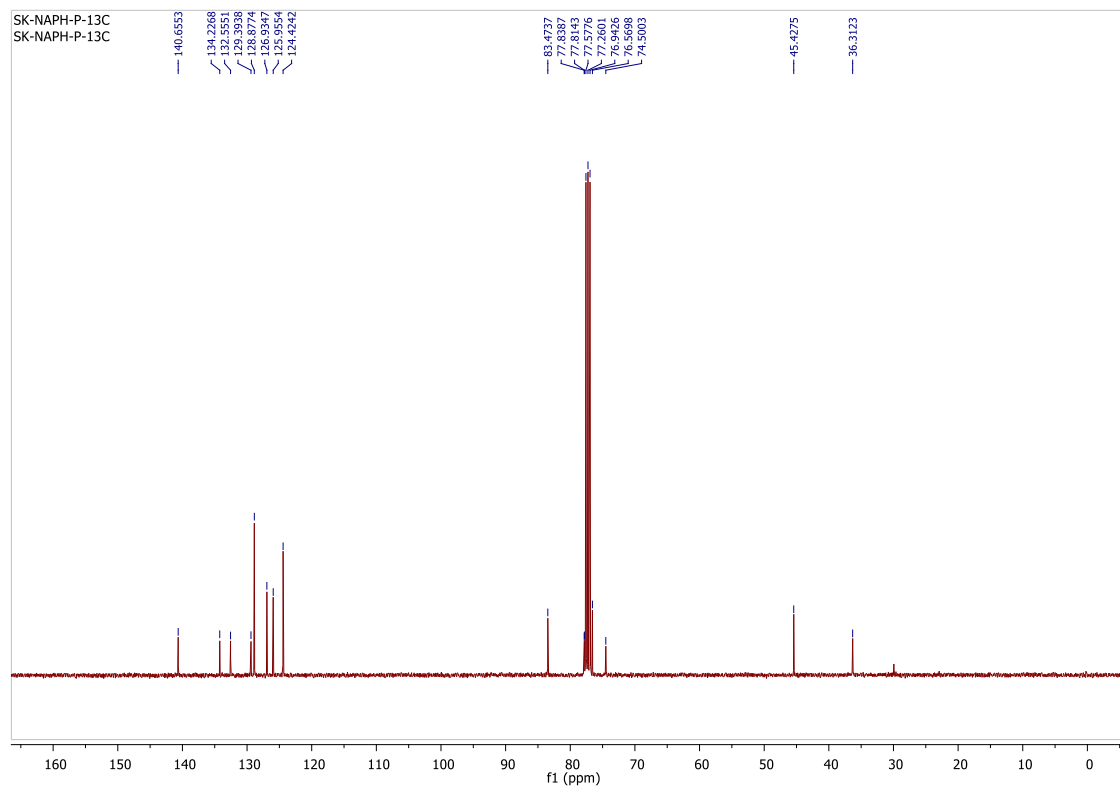

# $^1\text{H}$ and $^{13}\text{C}$ NMR spectra of **4h**

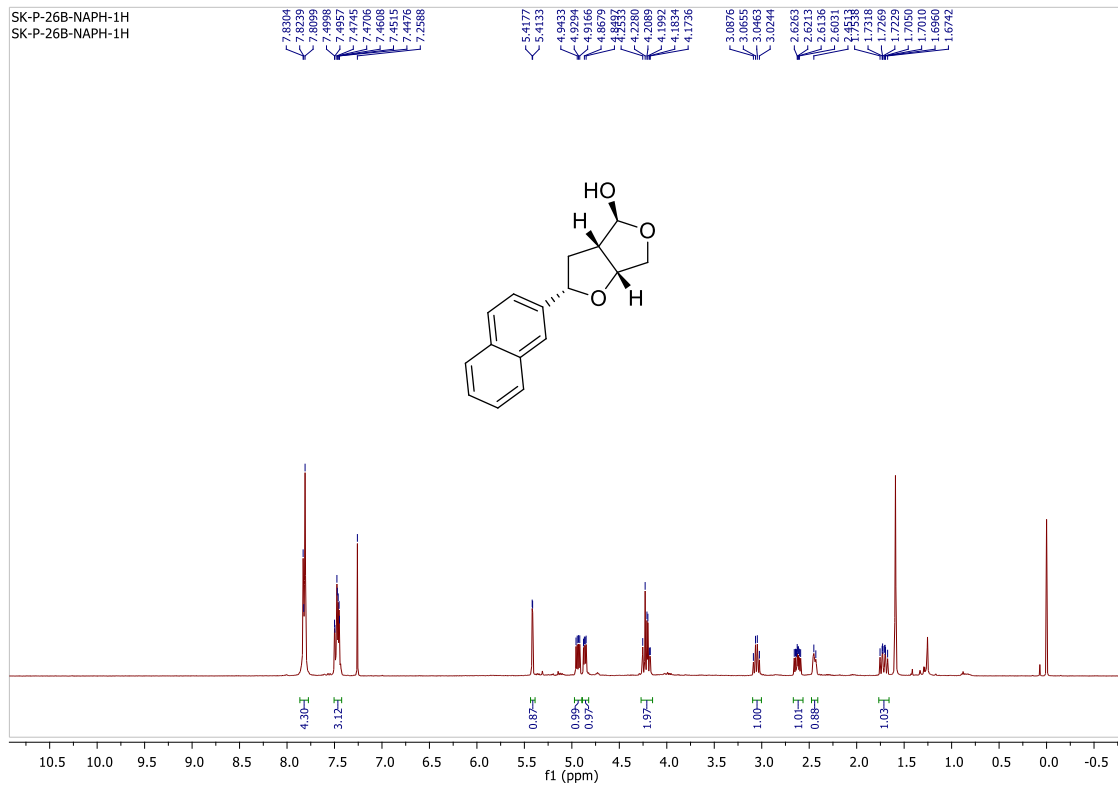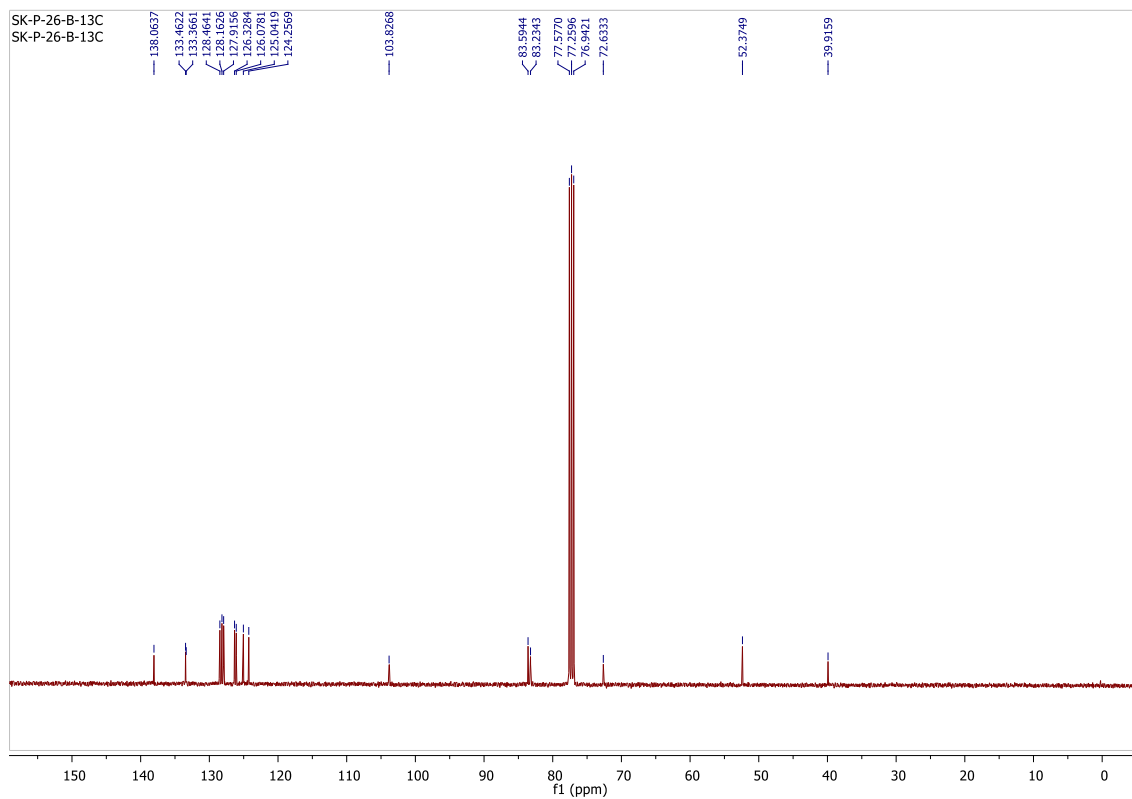

# $^1\text{H}$ and $^{13}\text{C}$ NMR spectra of **3i**

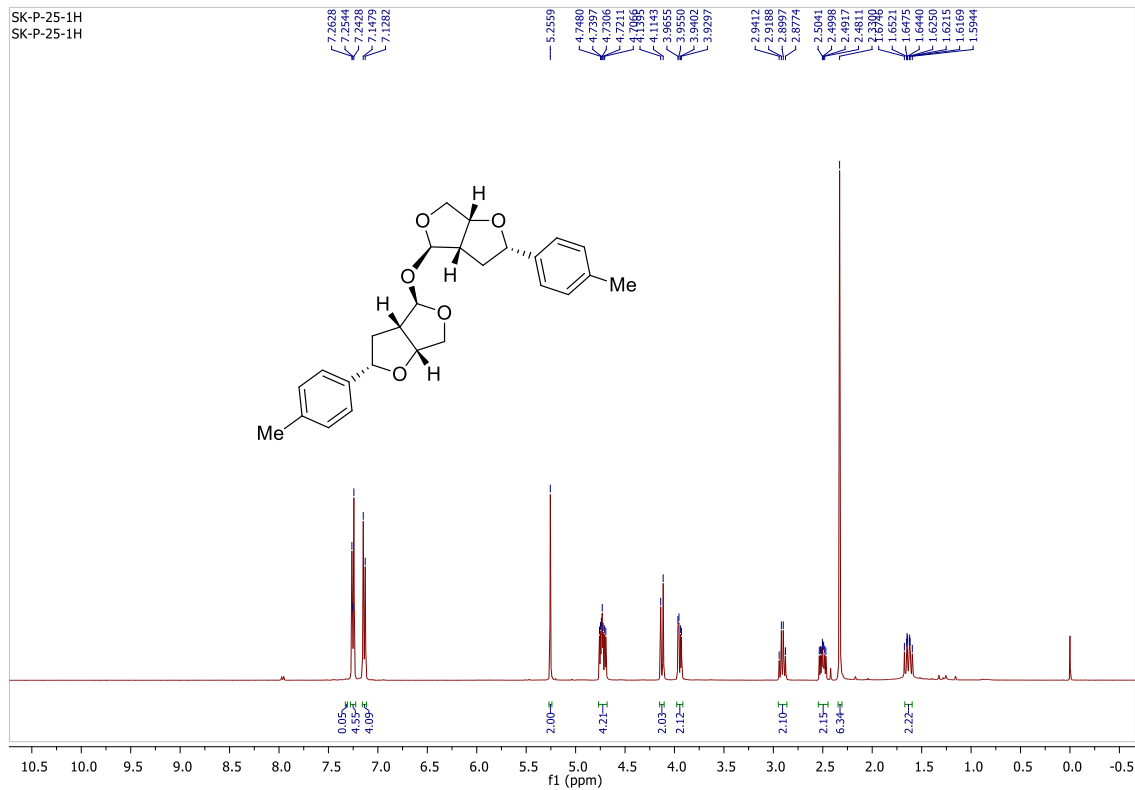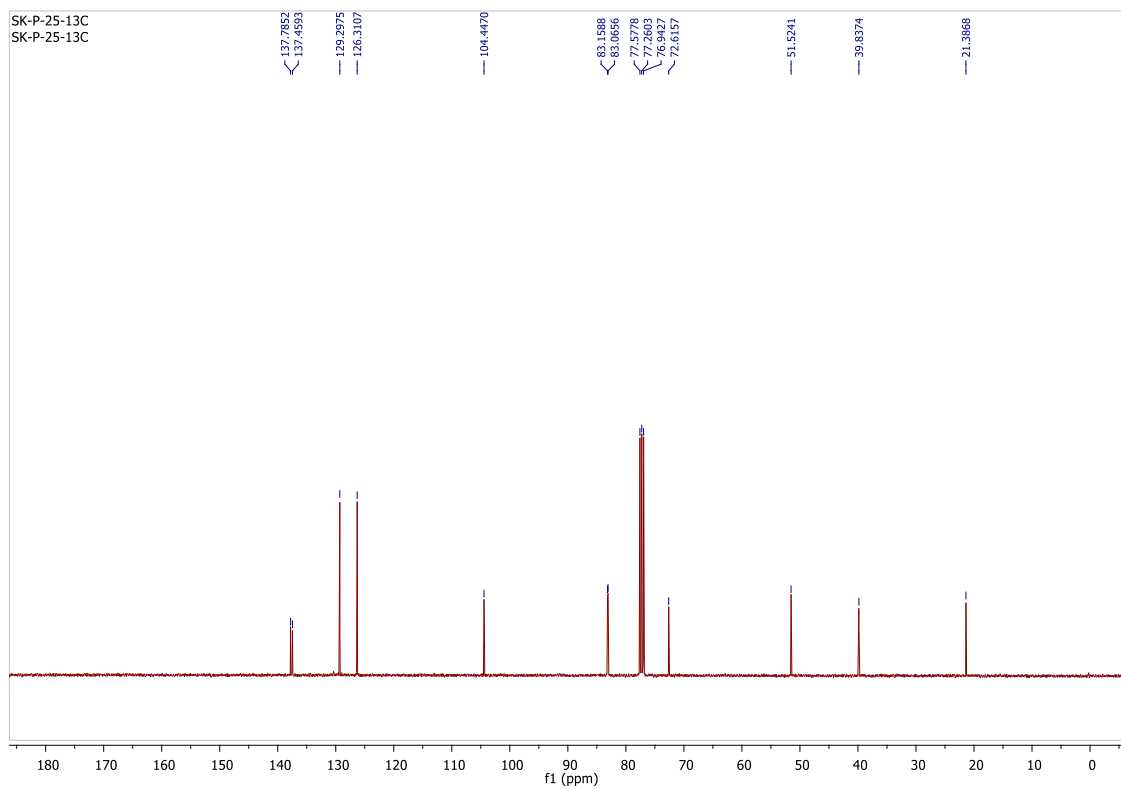

# $^1\text{H}$ and $^{13}\text{C}$ NMR spectra of **4i**

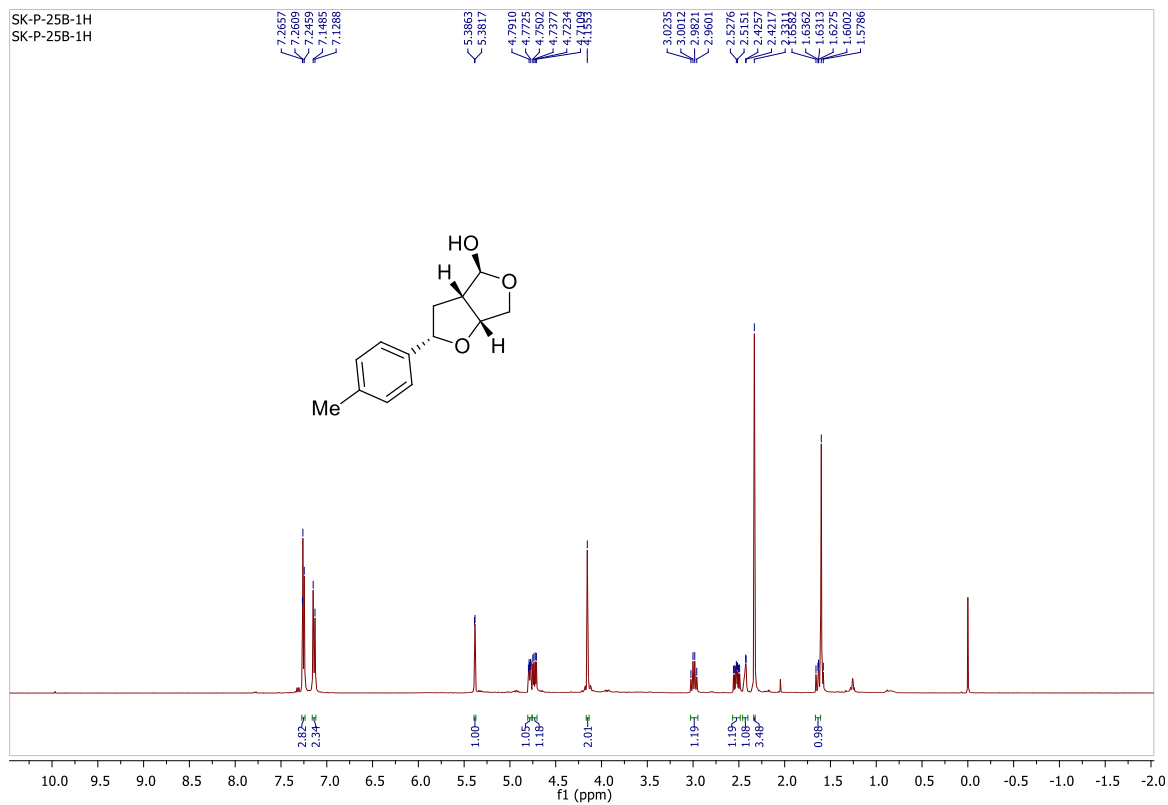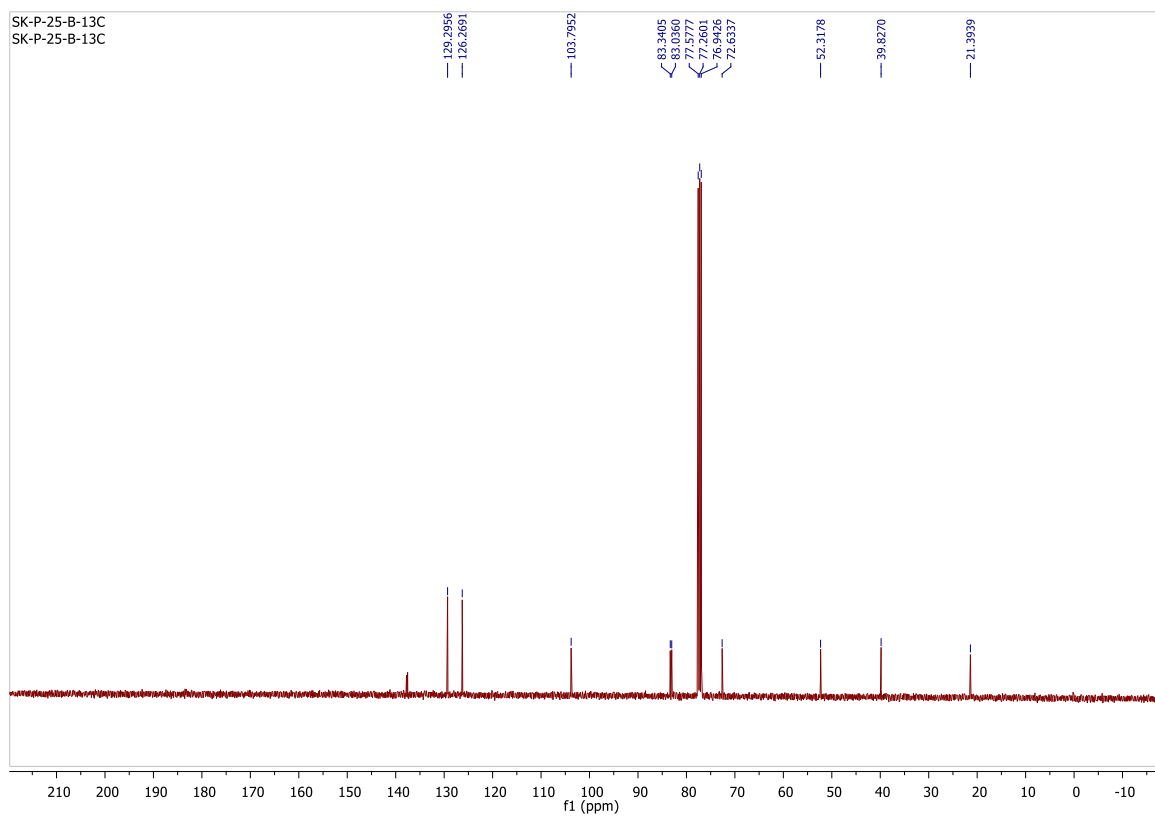

# <sup>1</sup>H and <sup>13</sup>C NMR spectra of **4j**

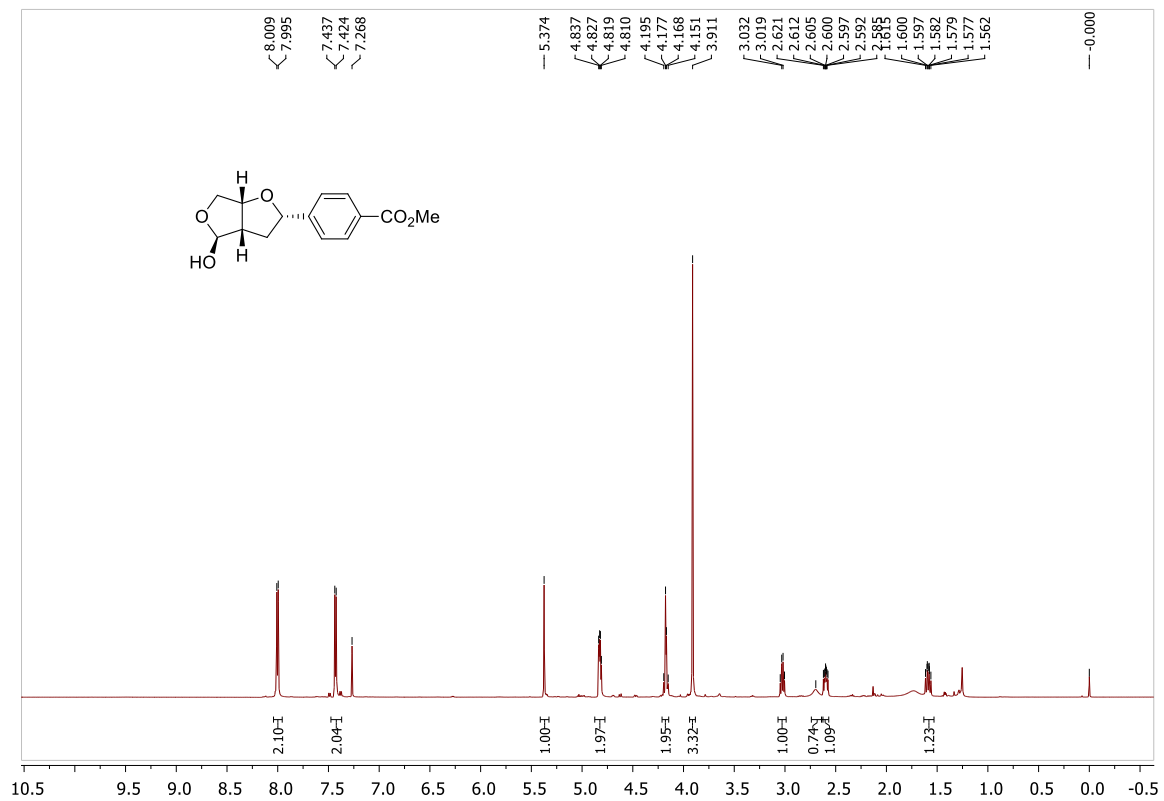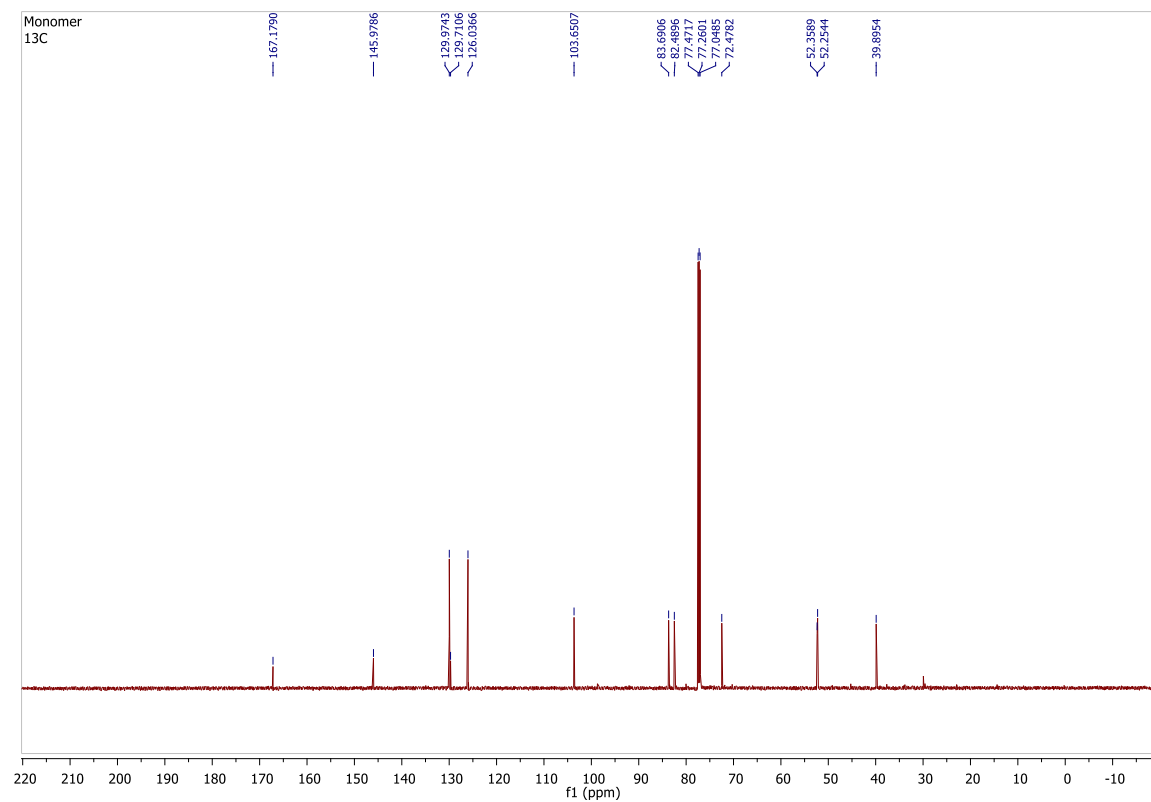



# $^1\text{H}$ and $^{13}\text{C}$ NMR spectra of **3k**

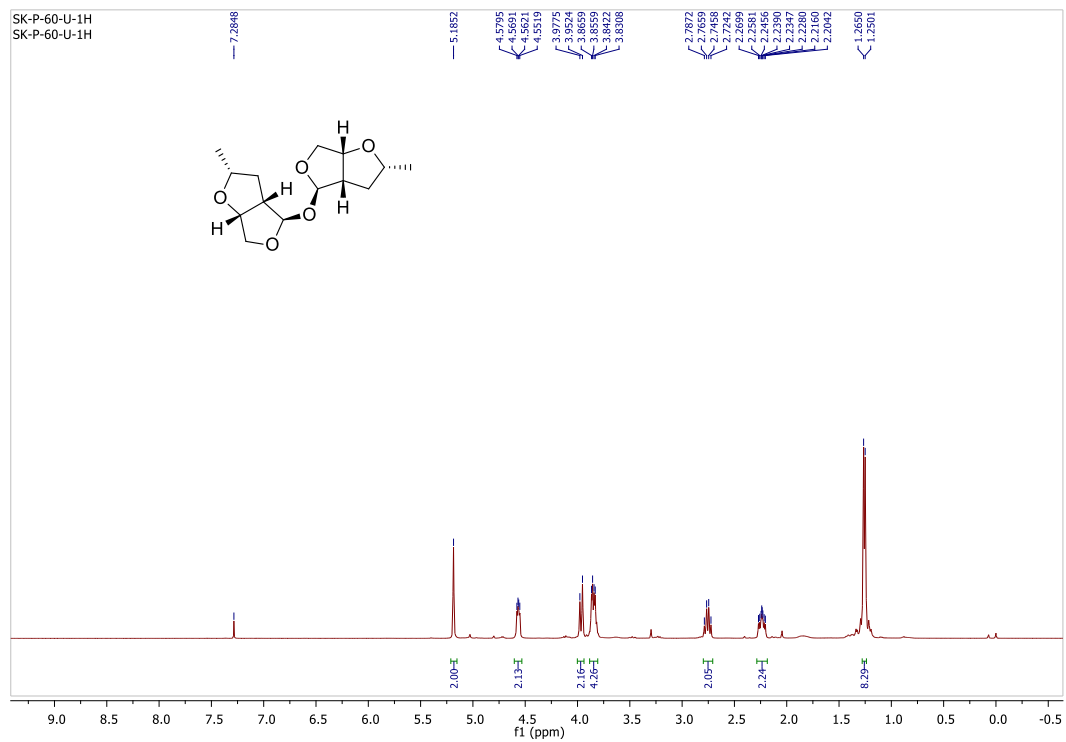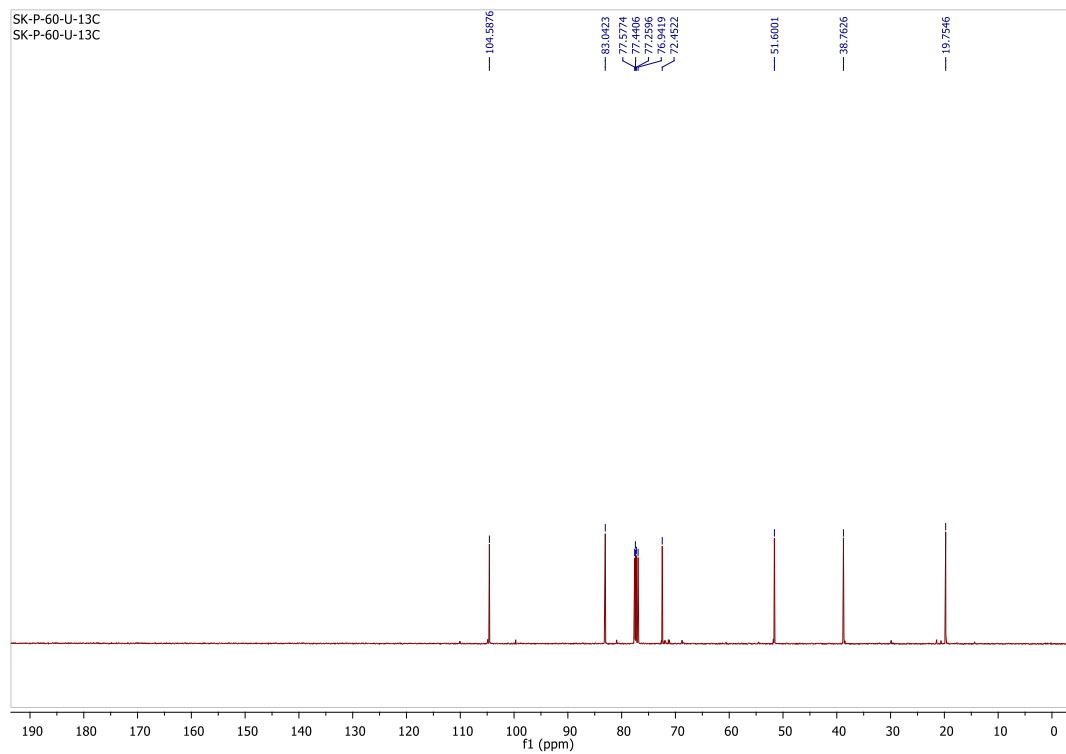

# <sup>1</sup>H and <sup>13</sup>C NMR spectra of **4k**

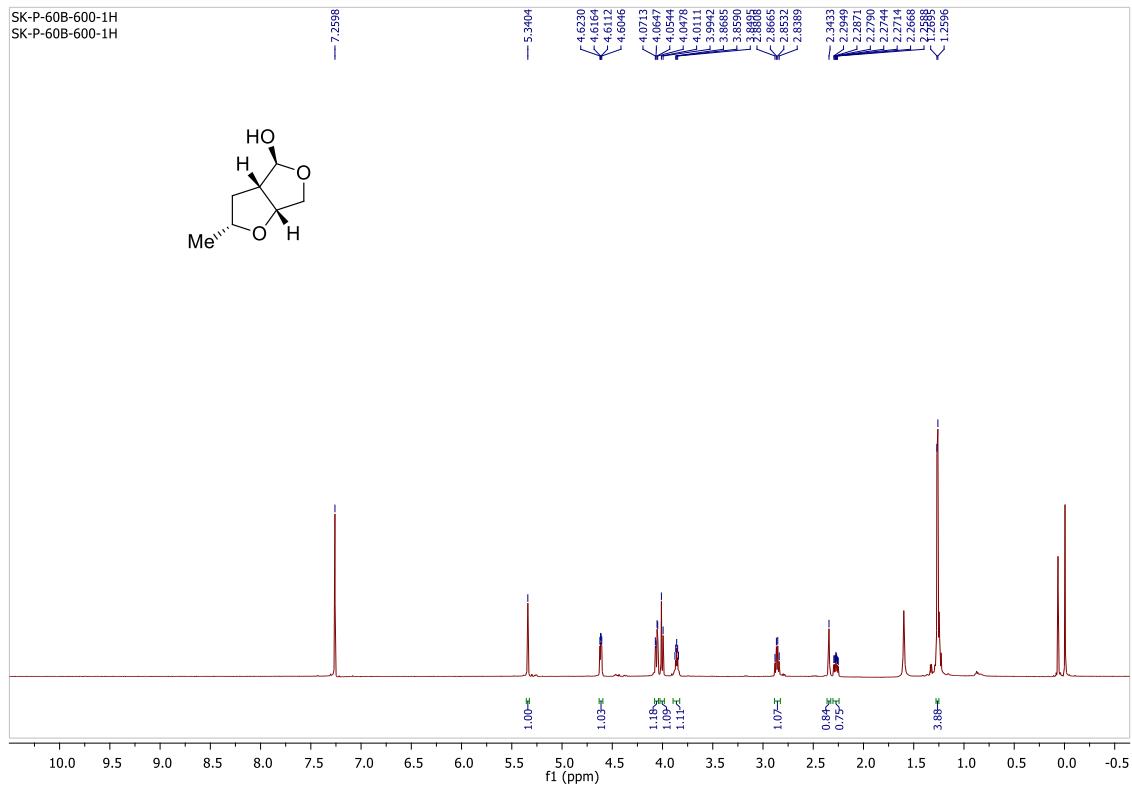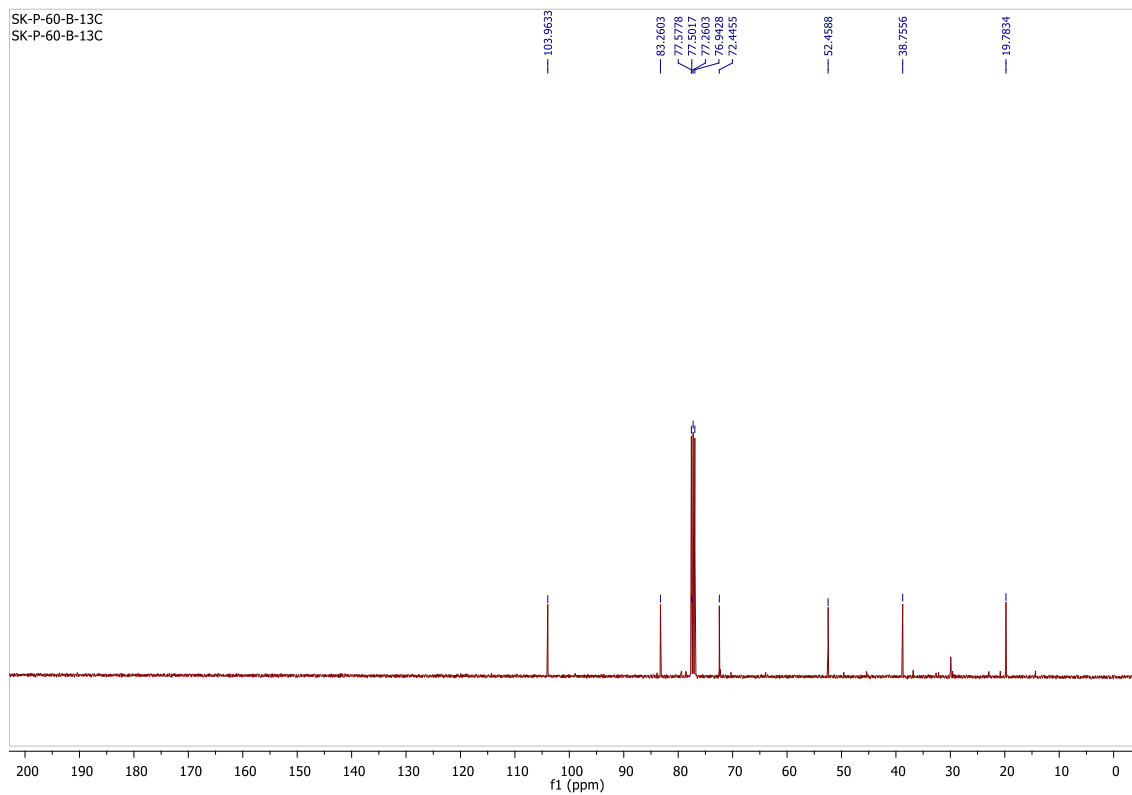

$^1\text{H}$  and  $^{13}\text{C}$  NMR spectra of **31**

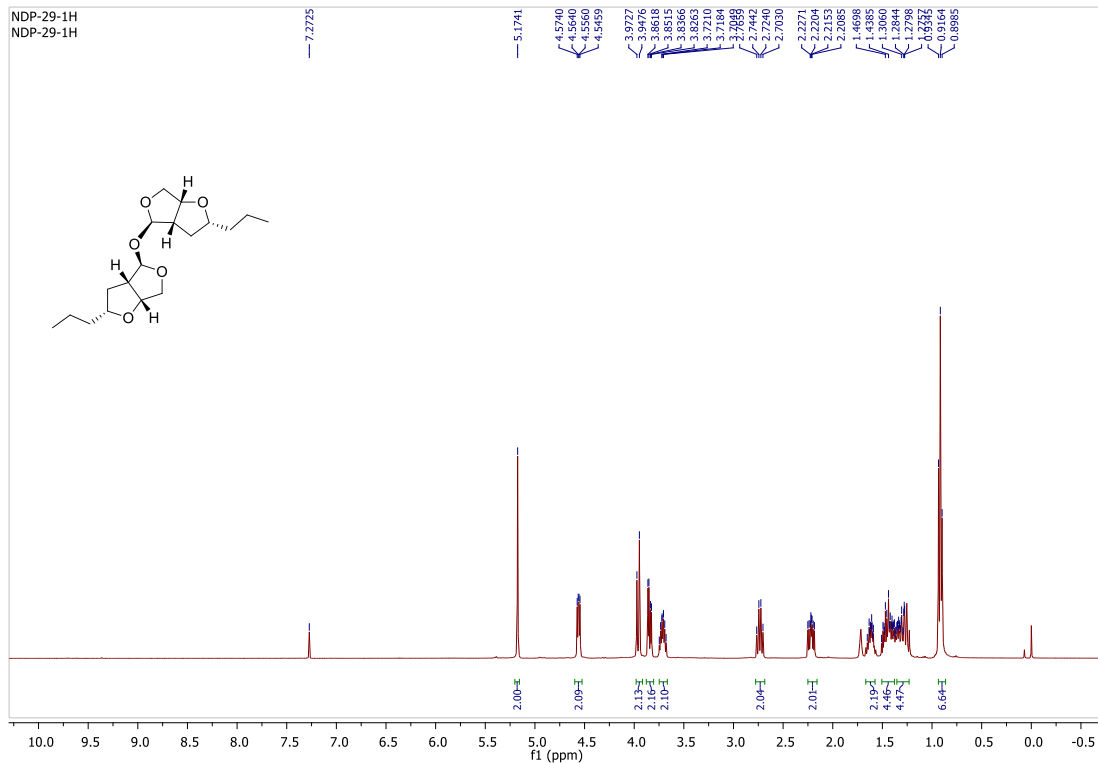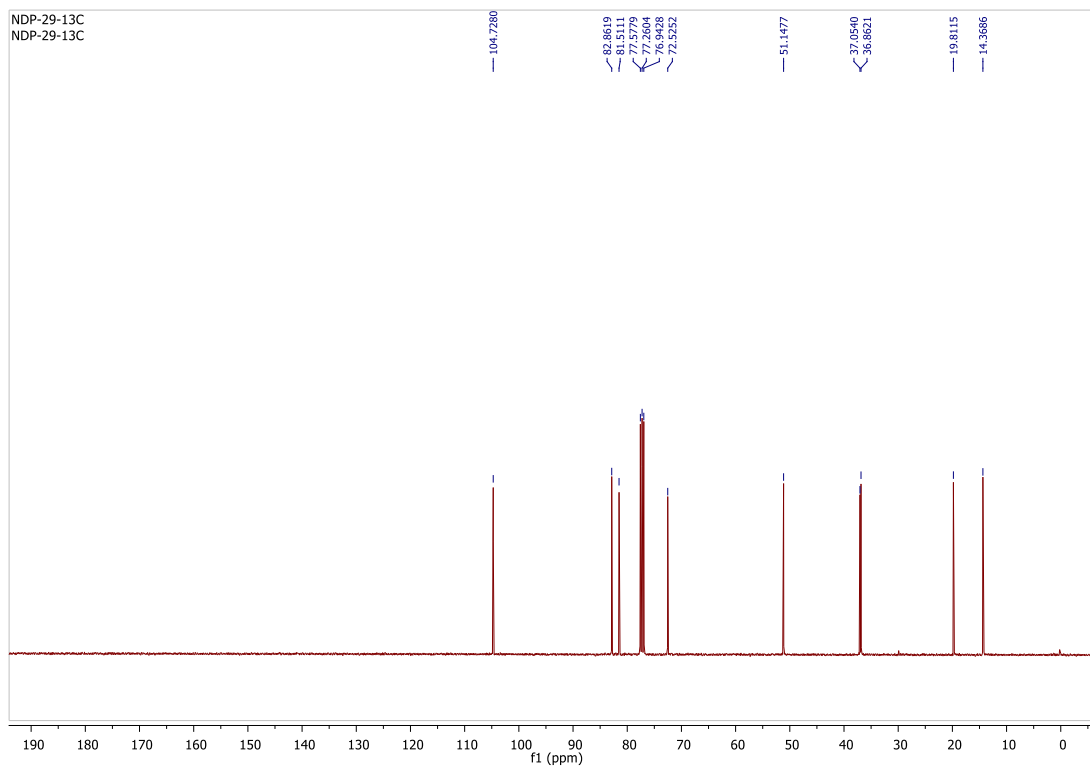

# <sup>1</sup>H and <sup>13</sup>C NMR spectra of 41

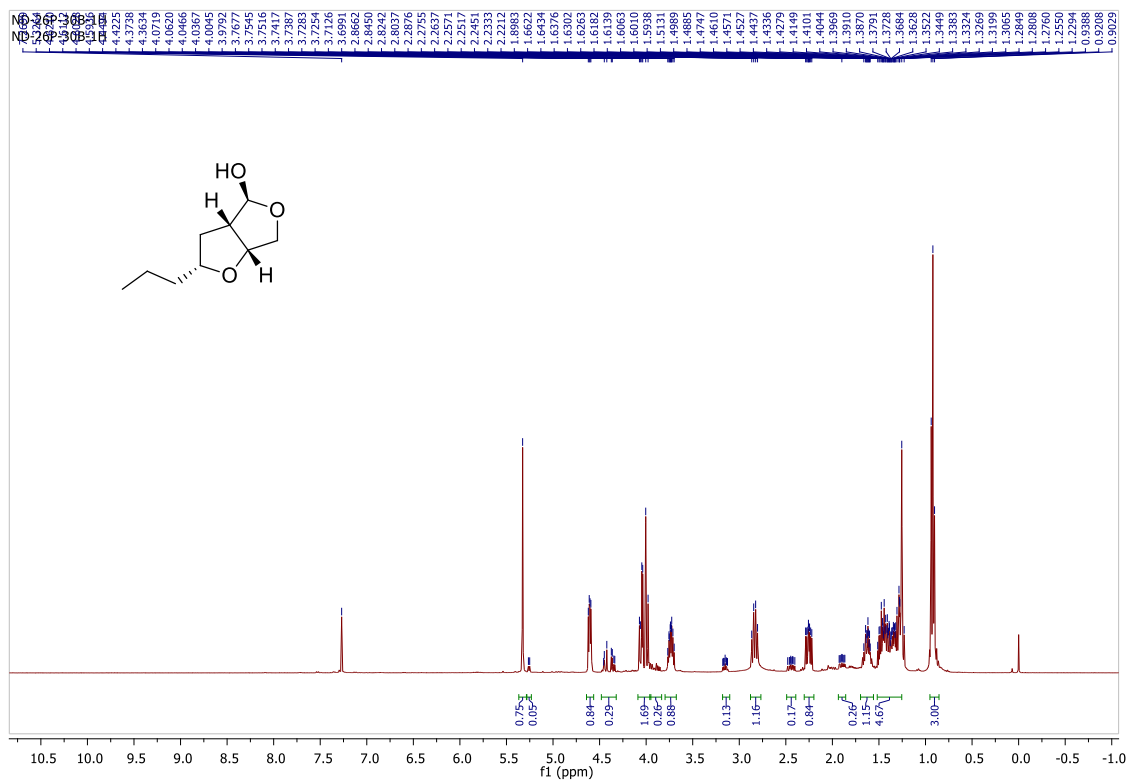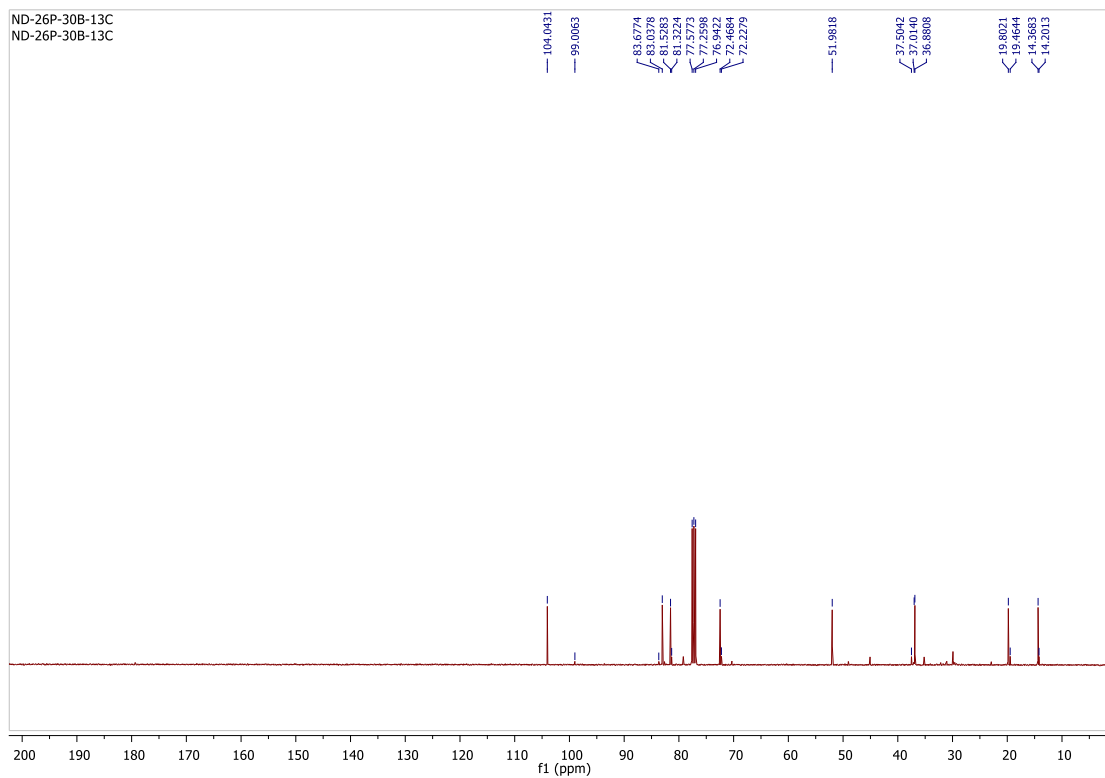

<sup>1</sup>H and <sup>13</sup>C NMR spectra of **4m**

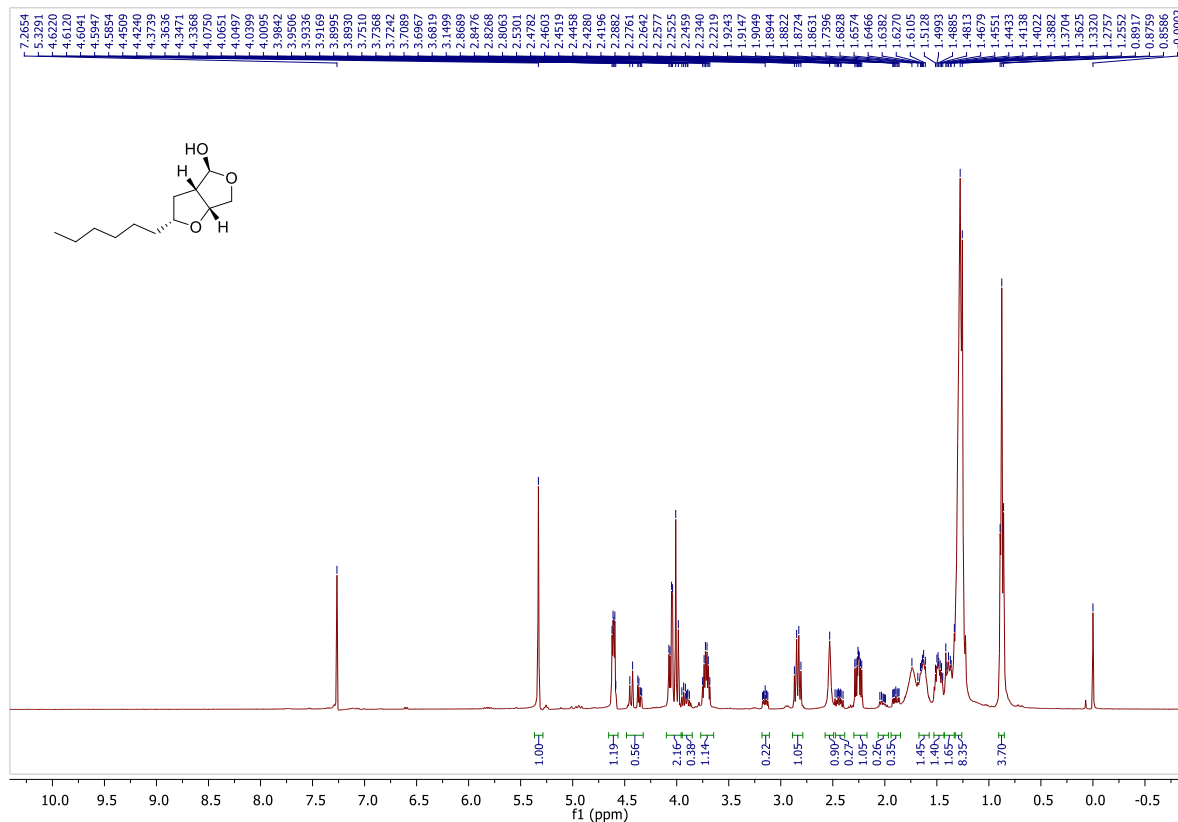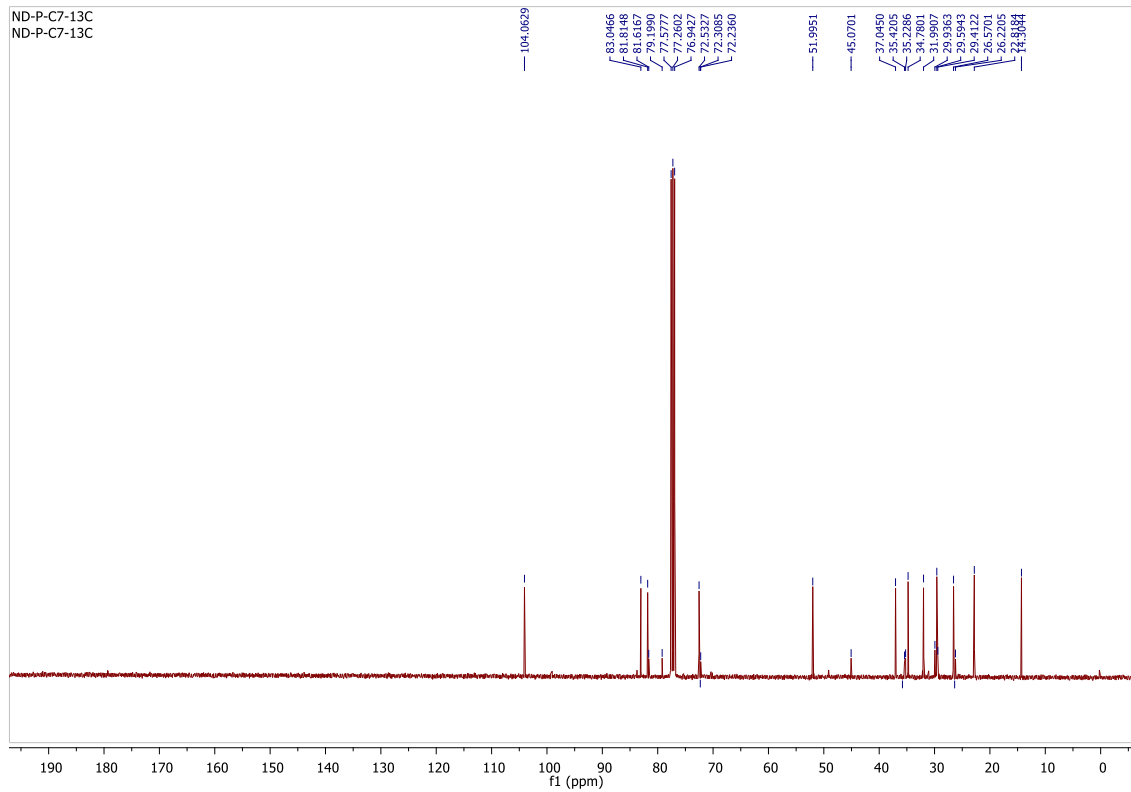

# $^1\text{H}$ and $^{13}\text{C}$ NMR spectra of **5d**

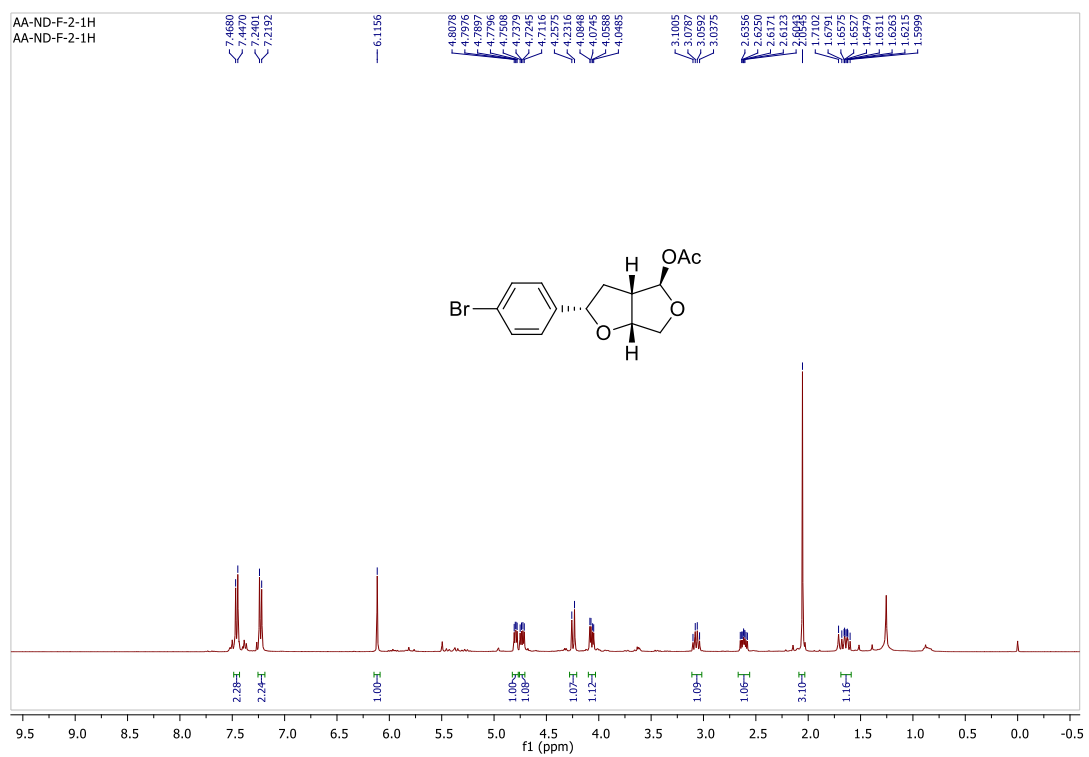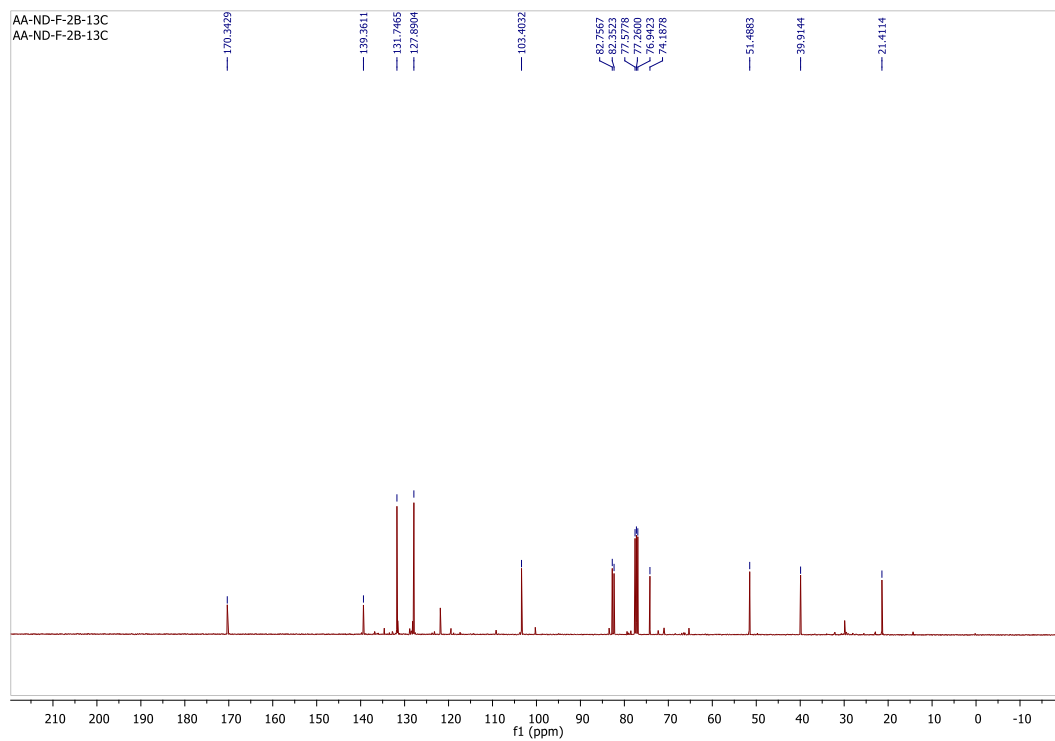

# Crude $^1\text{H}$ NMR spectrum of **4K**

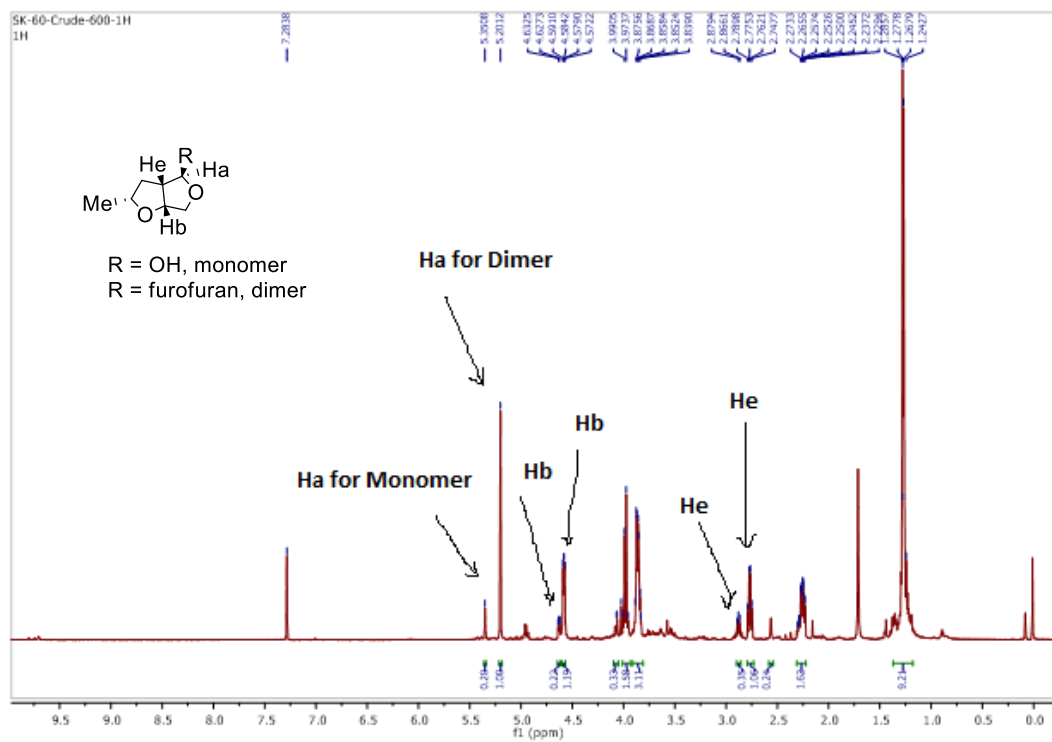

### COSY spectrum of compound 4d

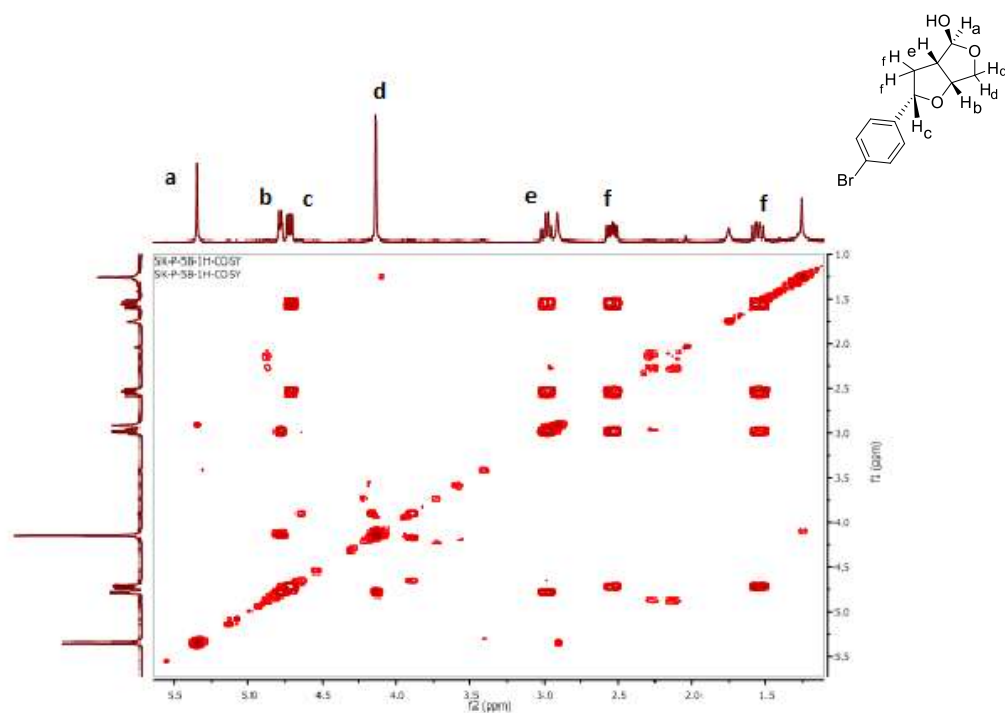

### NOESY spectrum of compound 4d

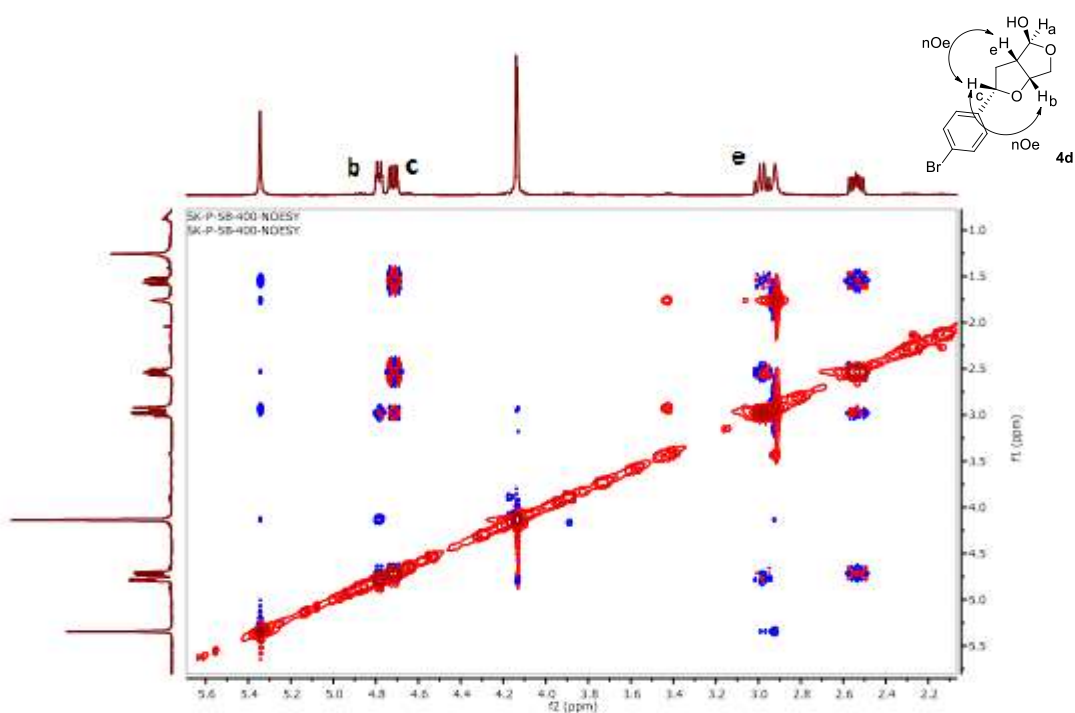



The crystal parameters of compound **3d**

|                                                     | CCDC 1888883                                                   |
|-----------------------------------------------------|----------------------------------------------------------------|
| Formula                                             | C <sub>24</sub> H <sub>24</sub> Br <sub>2</sub> O <sub>5</sub> |
| Formula weight                                      | 552.25                                                         |
| <i>T</i> /K                                         | 293(2)                                                         |
| Crystal system                                      | Orthorhombic                                                   |
| Space group                                         | P212121                                                        |
| <i>a</i> /Å                                         | 17.353(5)                                                      |
| <i>b</i> /Å                                         | 24.435(8)                                                      |
| <i>c</i> /Å                                         | 5.4165(17)                                                     |
| $\alpha$ /°                                         | 90.00                                                          |
| $\beta$ /°                                          | 90.00                                                          |
| $\gamma$ /°                                         | 90.00                                                          |
| <i>V</i> /Å <sup>3</sup>                            | 2296.7(12)                                                     |
| <i>Z</i>                                            | 4                                                              |
| Abs. Coeff./mm <sup>-1</sup>                        | 3.562                                                          |
| Abs. Correction                                     | none                                                           |
| GOF on <i>F</i> <sup>2</sup>                        | 0.974                                                          |
| Final <i>R</i> indices [ <i>I</i> > 2σ( <i>I</i> )] | <i>RI</i> = 0.0605<br><i>wR2</i> = 0.1377                      |
| <i>R</i> indices [all data]                         | <i>RI</i> = 0.1571<br><i>wR2</i> = 0.1942                      |

ORTEP Diagram of compound **3d**

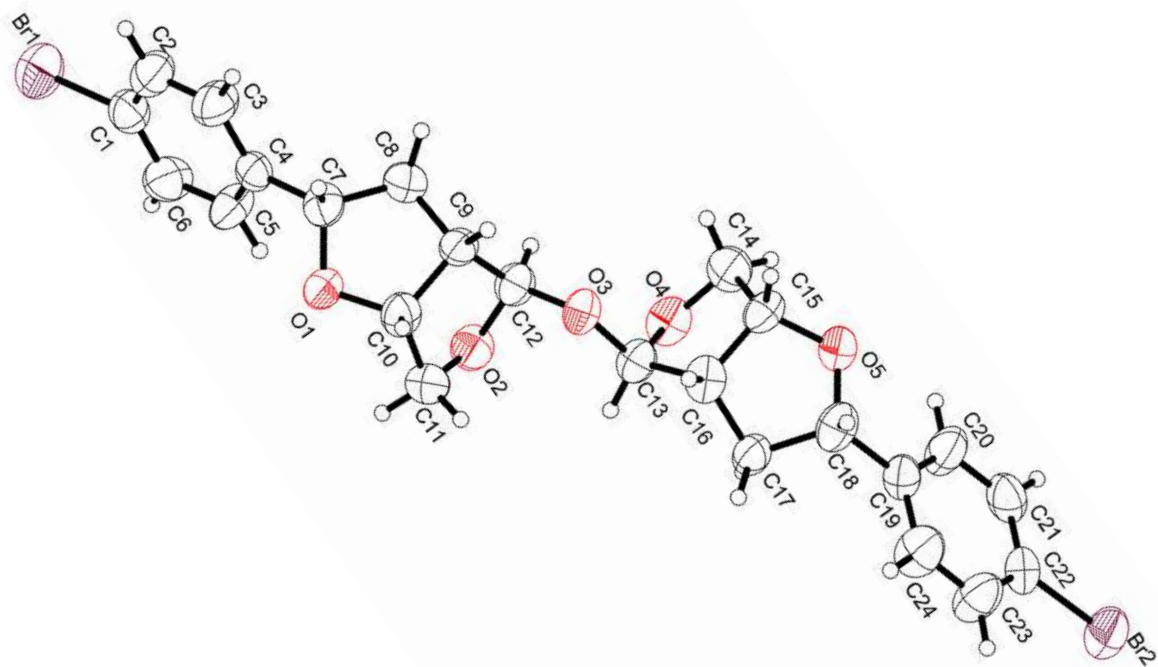

The crystal parameters of compound **4d**

|                                                              | CCDC 1914873                                      |
|--------------------------------------------------------------|---------------------------------------------------|
| Formula                                                      | C <sub>12</sub> H <sub>13</sub> Br O <sub>3</sub> |
| Formula weight                                               | 285.13                                            |
| <i>T</i> /K                                                  | 293(2)                                            |
| Crystal system                                               | monoclinic                                        |
| Space group                                                  | P1211                                             |
| <i>a</i> /Å                                                  | 5.8450(5)                                         |
| <i>b</i> /Å                                                  | 7.6852(6)                                         |
| <i>c</i> /Å                                                  | 12.8843(10)                                       |
| $\alpha$ /°                                                  | 90.00                                             |
| $\beta$ /°                                                   | 100.457(8)                                        |
| $\gamma$ /°                                                  | 90.00                                             |
| <i>V</i> /Å <sup>3</sup>                                     | 569.15(8)                                         |
| <i>Z</i>                                                     | 2                                                 |
| Abs. Coeff./mm <sup>-1</sup>                                 | 3.600                                             |
| Abs. Correction                                              | multi-scan                                        |
| GOF on <i>F</i> <sup>2</sup>                                 | 1.029                                             |
| Final <i>R</i> indices [ <i>I</i> > 2 $\sigma$ ( <i>I</i> )] | <i>R</i> 1 = 0.0437<br><i>wR</i> 2 = 0.0851       |
| <i>R</i> indices [all data]                                  | <i>R</i> 1 = 0.0541<br><i>wR</i> 2 = 0.0930       |

ORTEP Diagram of compound **4d**

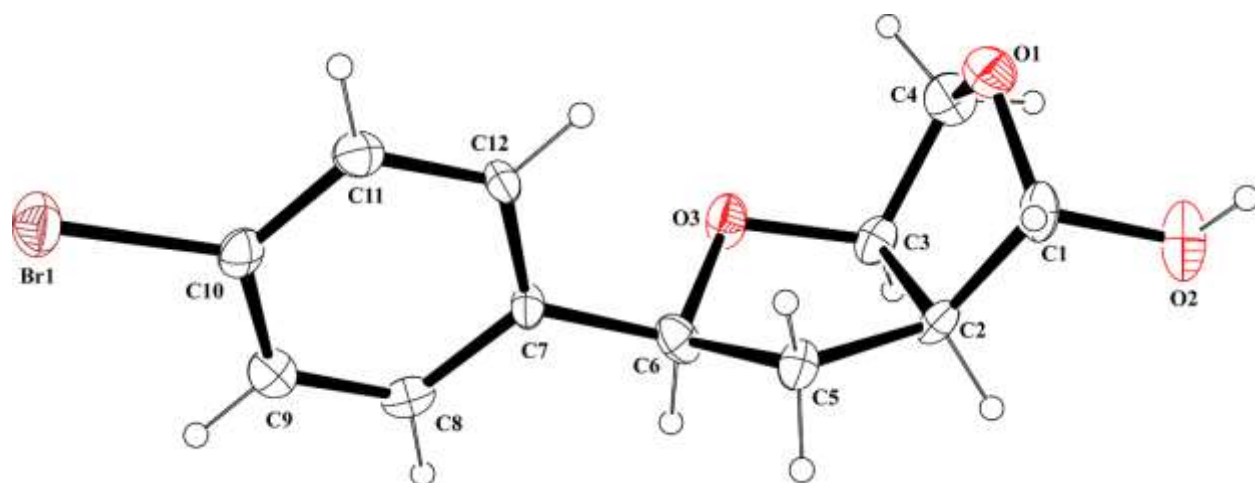

Supplement: c9ob01353a2.pdf [file c9ob01353a2.pdf]
