# Supplementary material for: Stereoselective synthesis of hexahydrofuro[3,4-b]furan-4-ol and its dimer via tandem Prins and pinacol rearrangement
Source: Royal Society of Chemistry journal article supplement (doi:10.1039/c9ob01353a), 2019-01-01

## Supporting information

### Stereoselective Synthesis of Hexahydrofuro[3,4-*b*]furan-4-ol and Its Dimer via Tandem Prins and Pinacol Rearrangement

Sudip Shit, Namita Devi, Ngangbam Renubala Devi and Anil K Saikia\*<sup>a</sup>

<sup>a</sup>Department of Chemistry, Indian Institute of Technology Guwahati, Guwahati 781039, India.

e-mail: [asaikia@iitg.ac.in](mailto:asaikia@iitg.ac.in)

#### Table of Contents

1. IR spectra of compounds 3 & 4

S2-S14

### IR spectrum of compound 3a

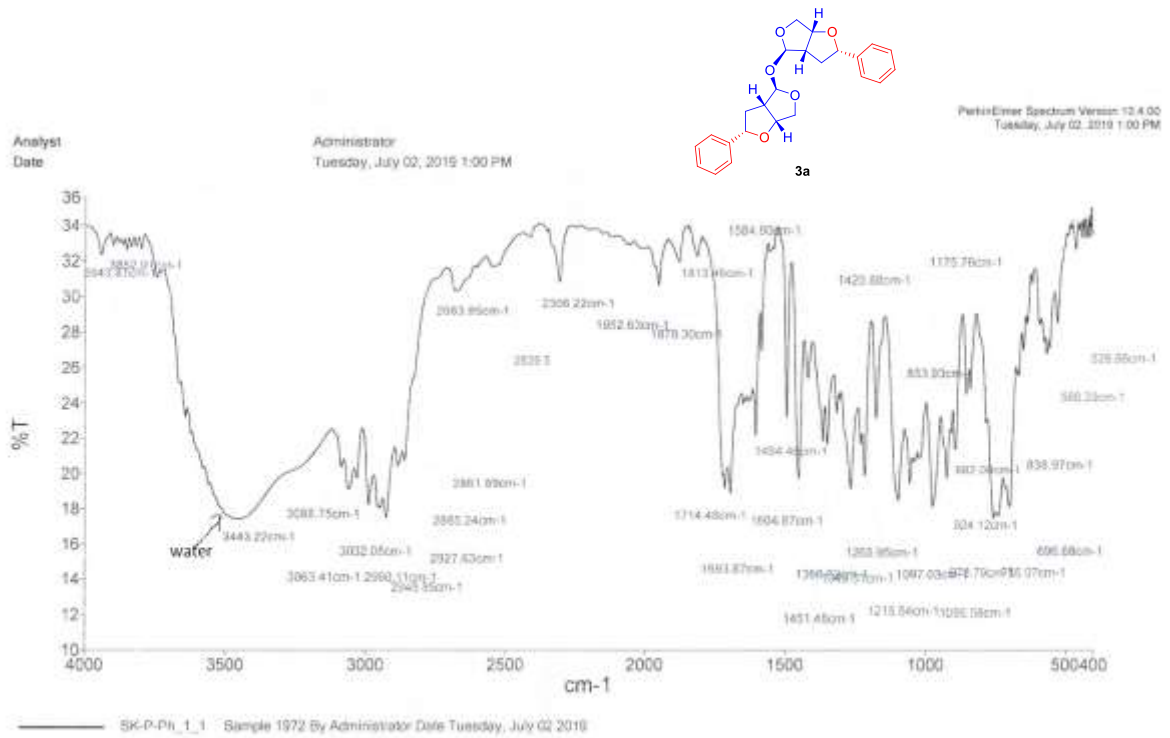

### IR spectrum of compound 4a

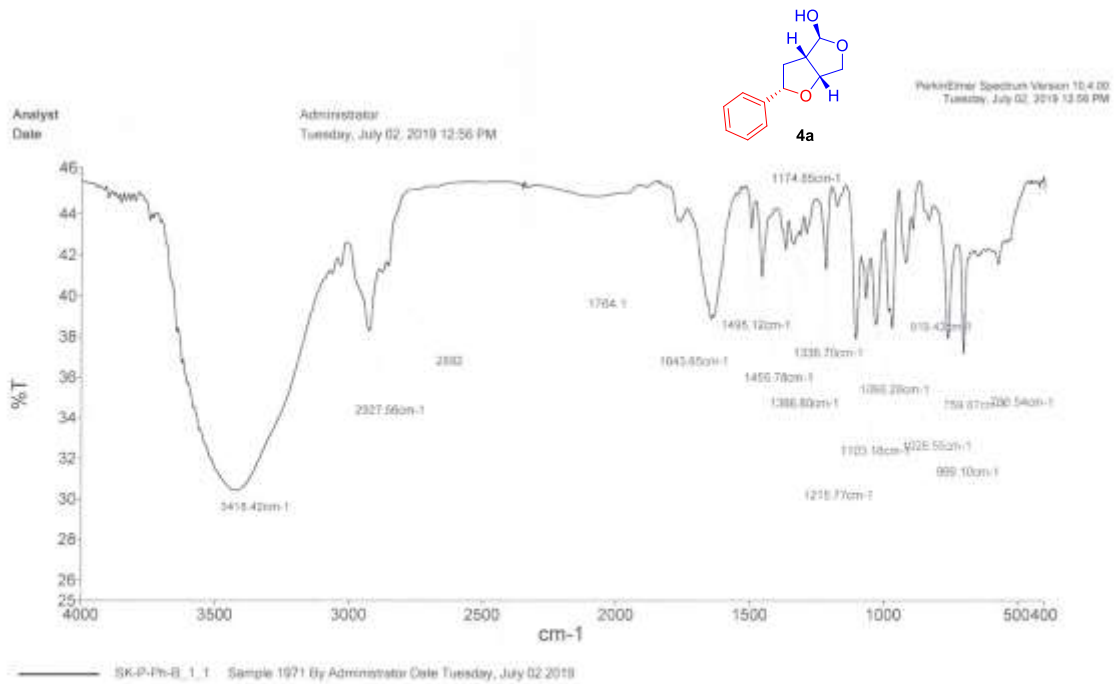

### IR spectrum of compound 3b

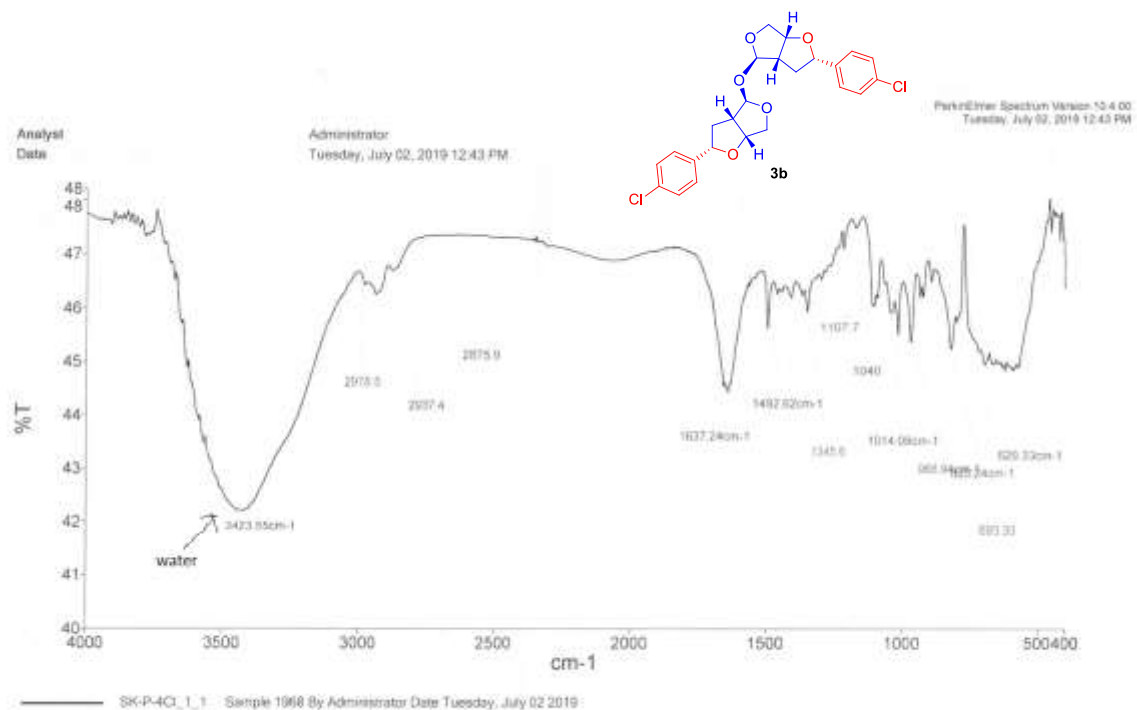

### IR spectrum of compound 4b

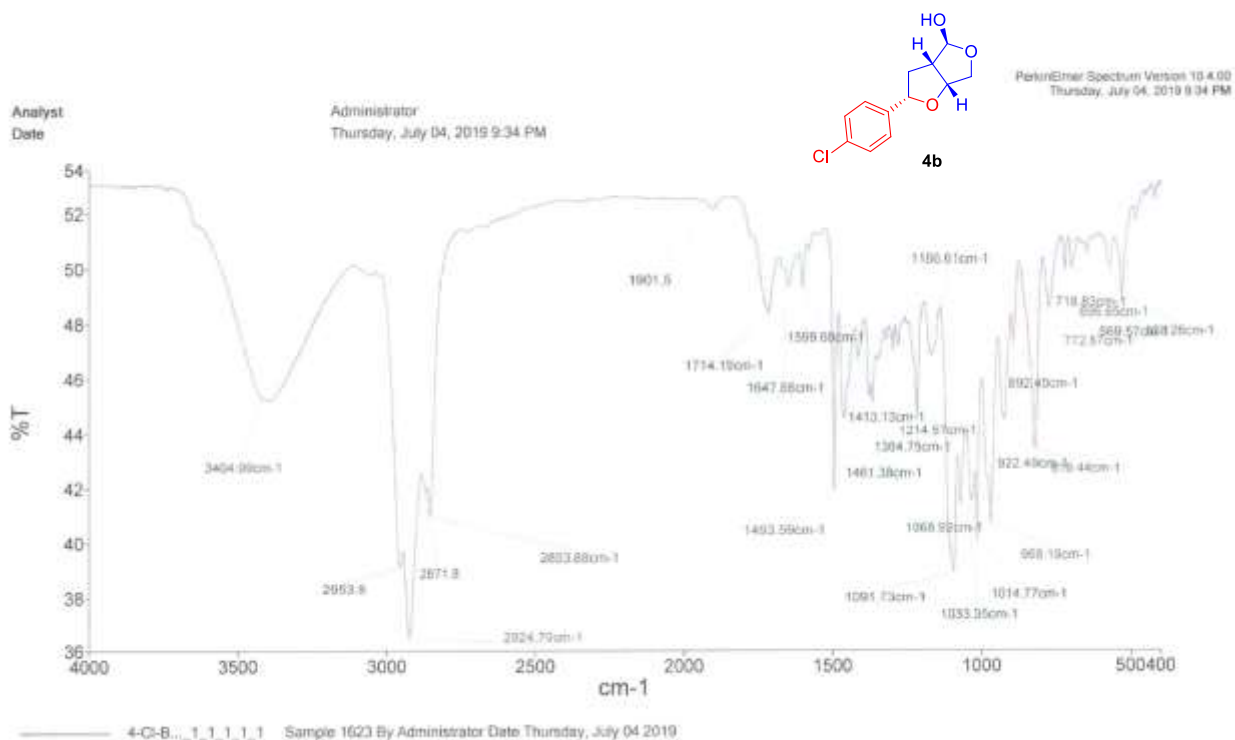

### IR spectrum of compound 3c

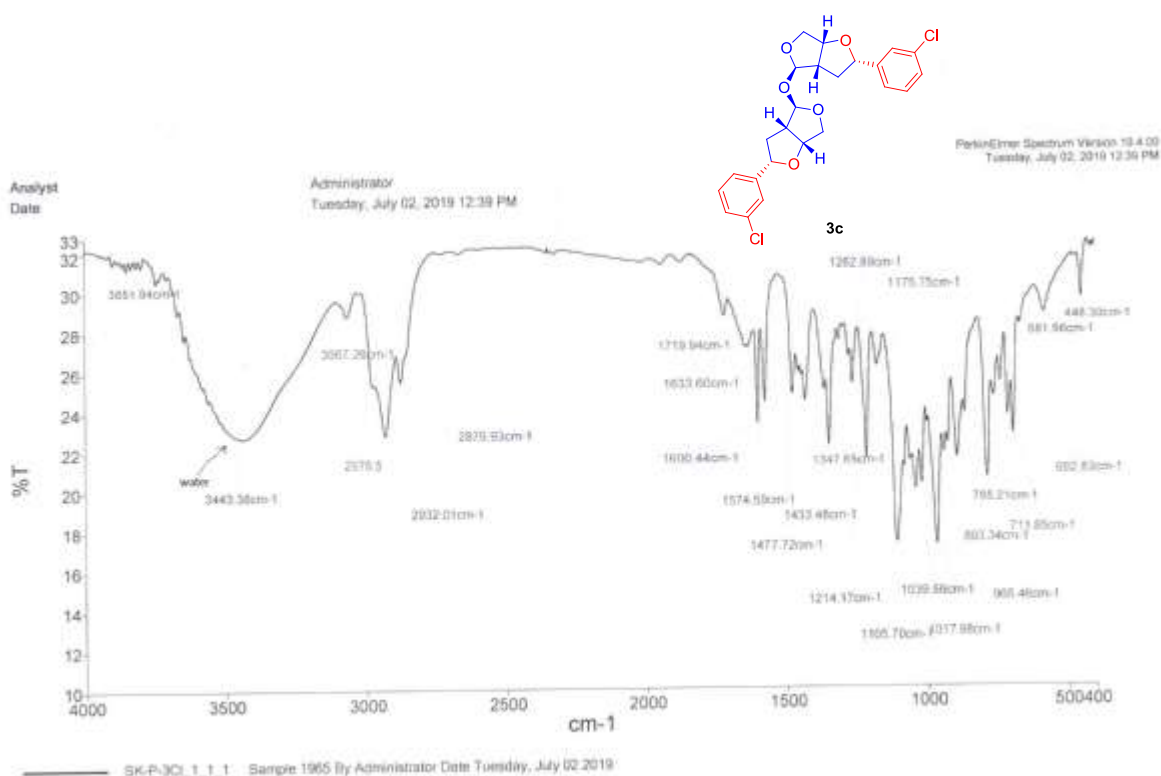

### IR spectrum of compound 4c

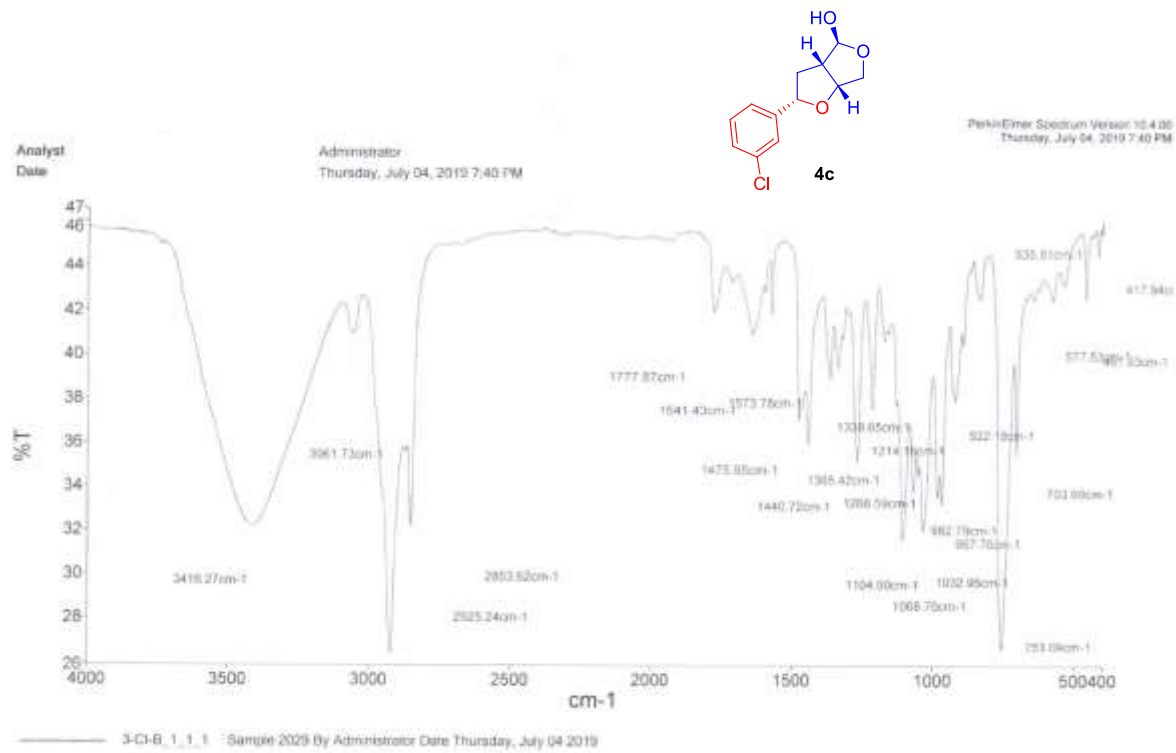

### IR spectrum of compound 3d

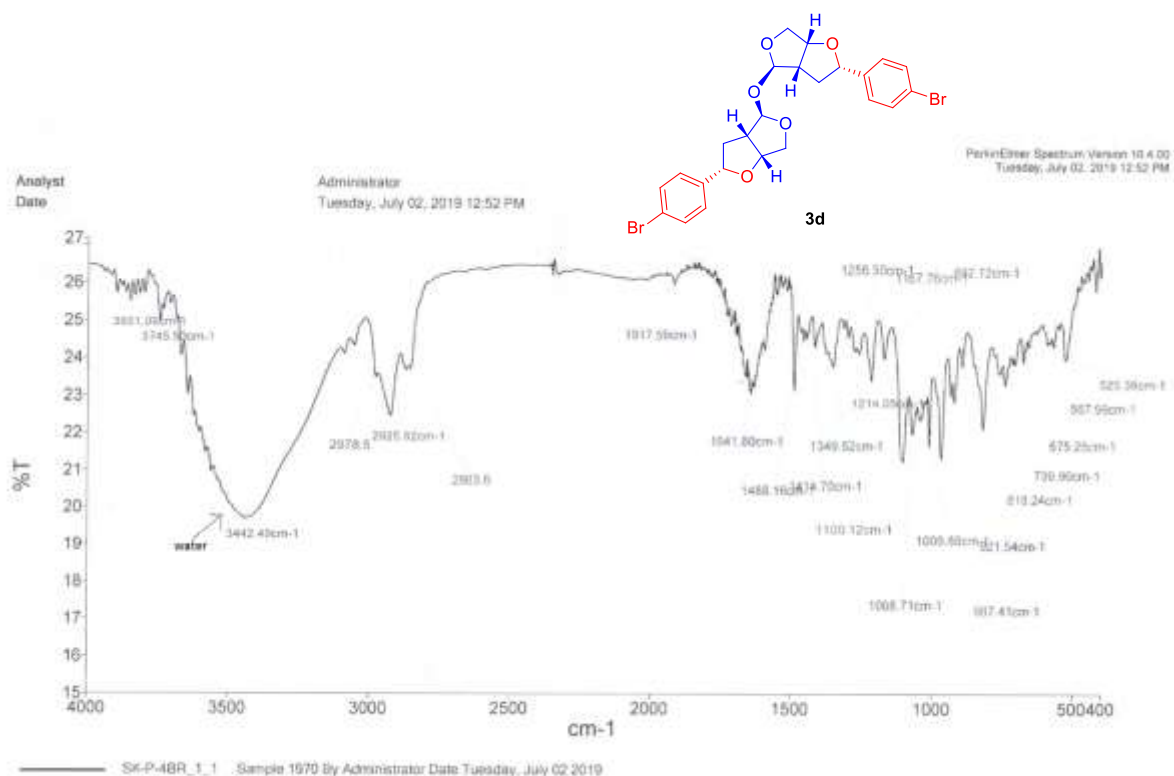

### IR spectrum of compound 4d

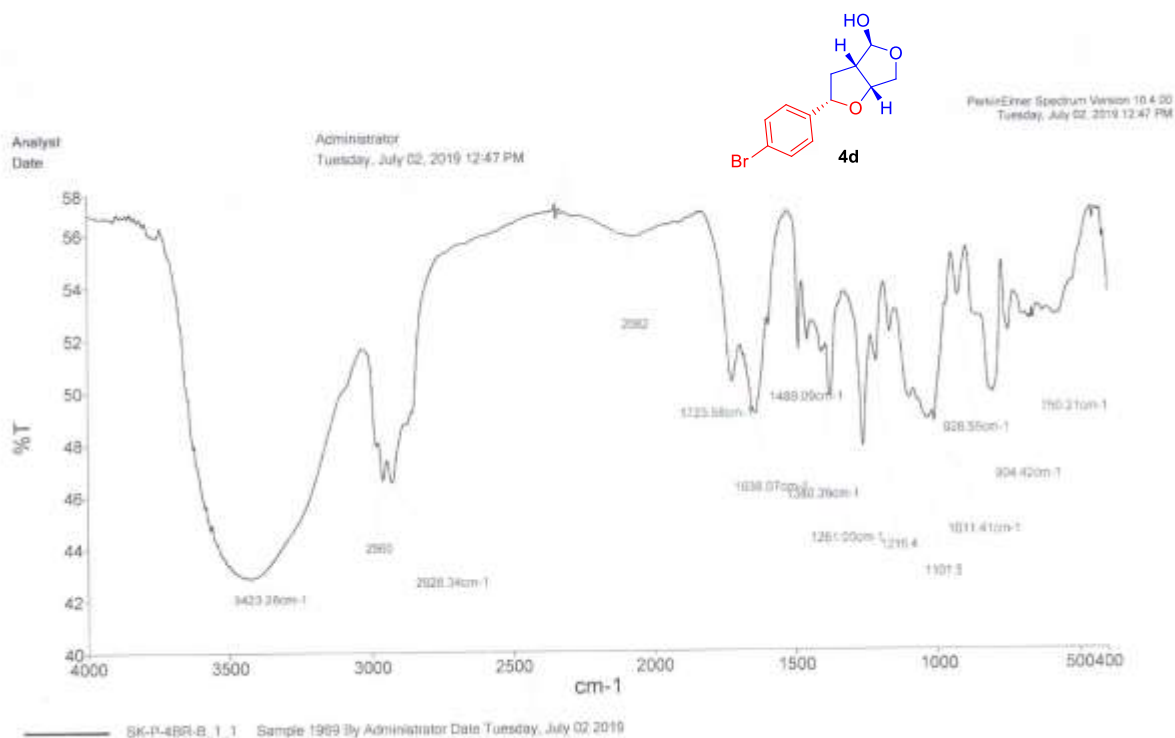

### IR spectrum of compound 3e

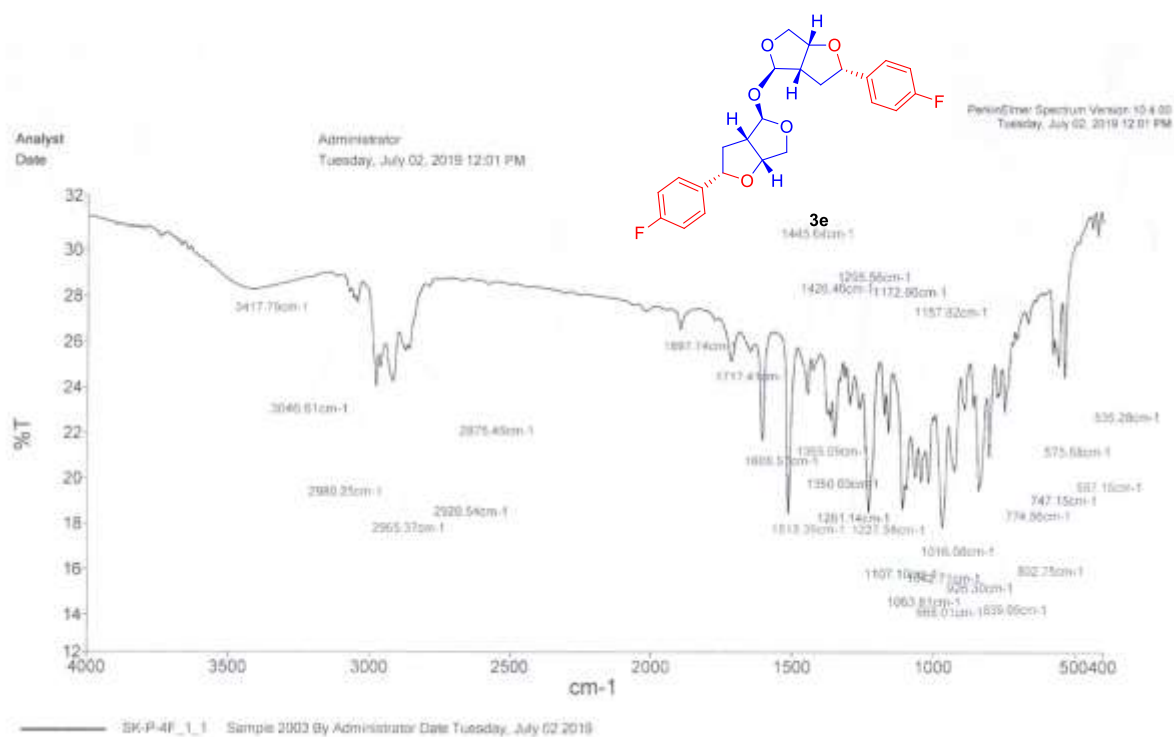

### IR spectrum of compound 4e

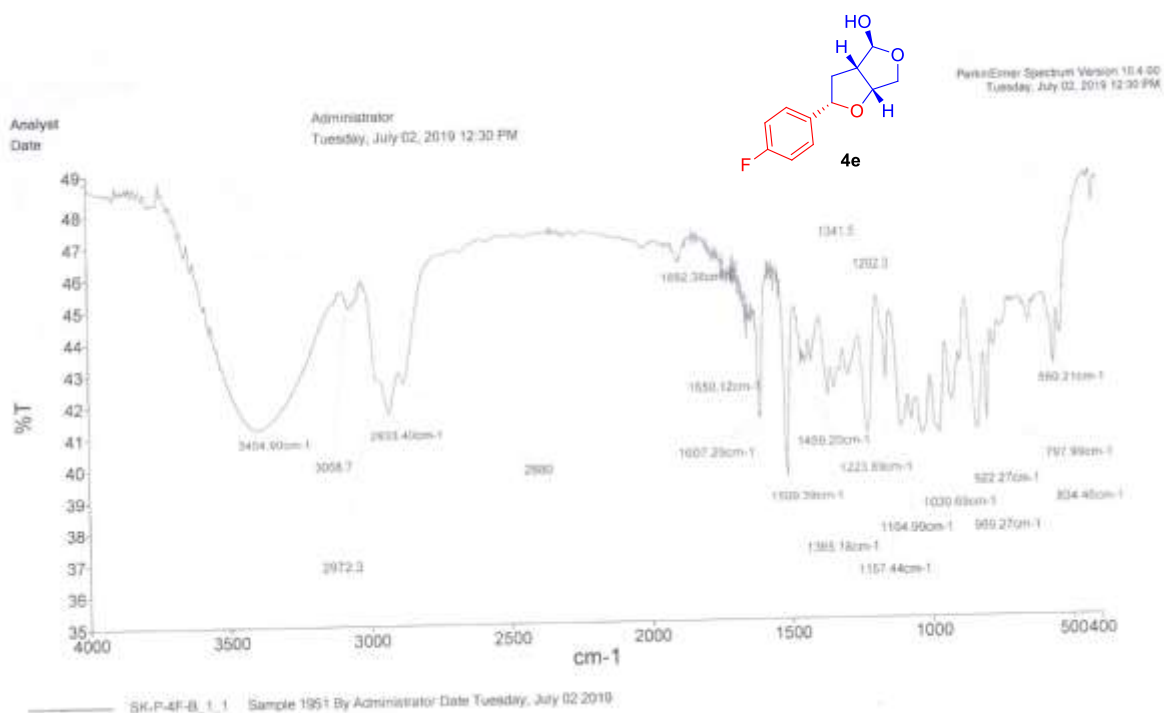

### IR spectrum of compound 3f

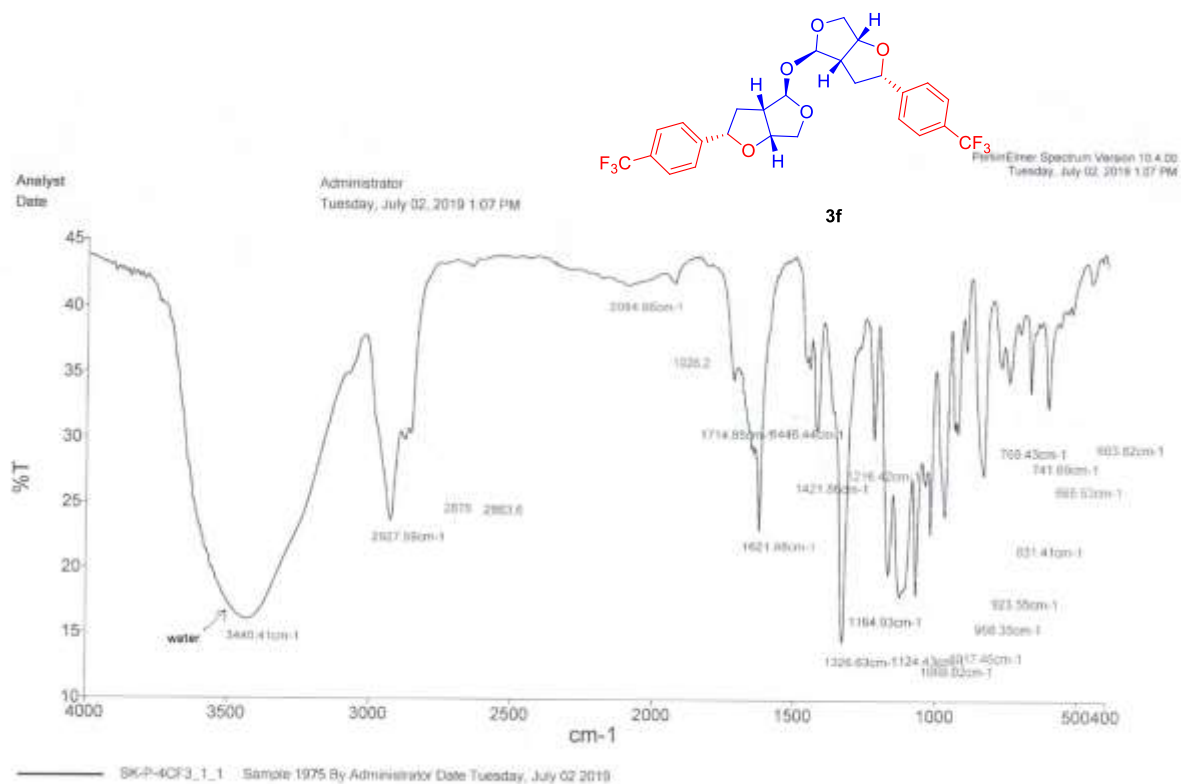

### IR spectrum of compound 4f

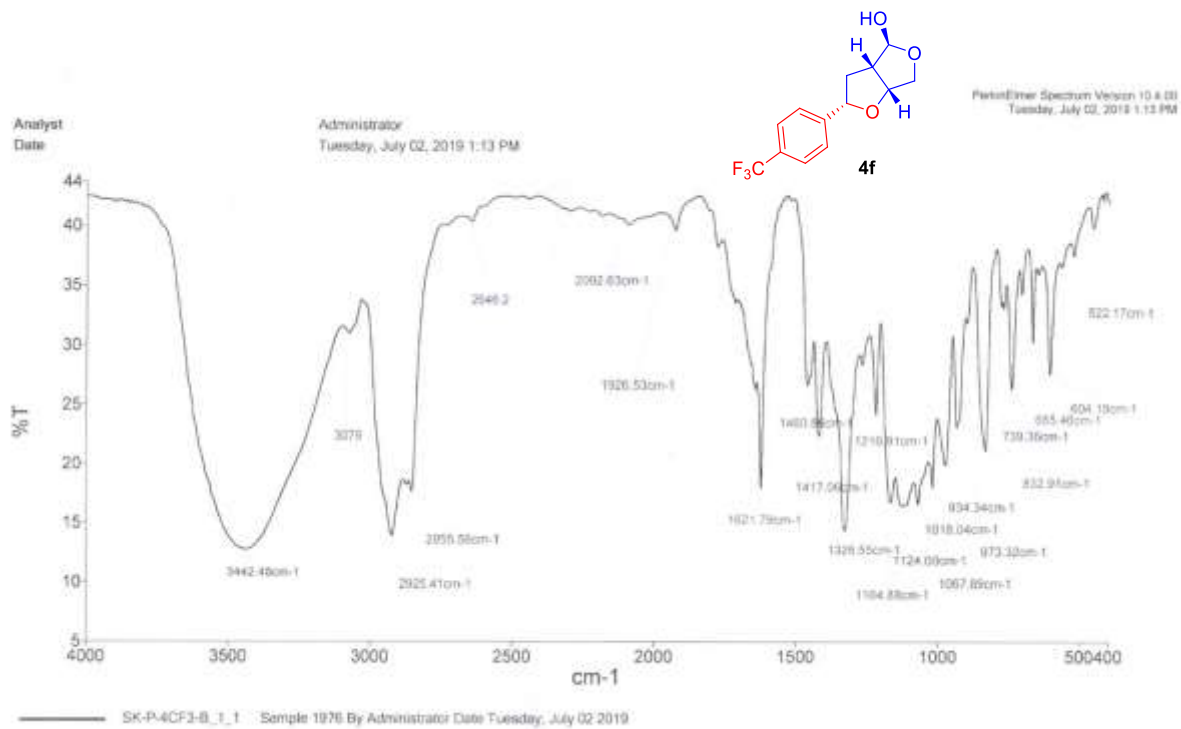

### IR spectrum of compound 3g

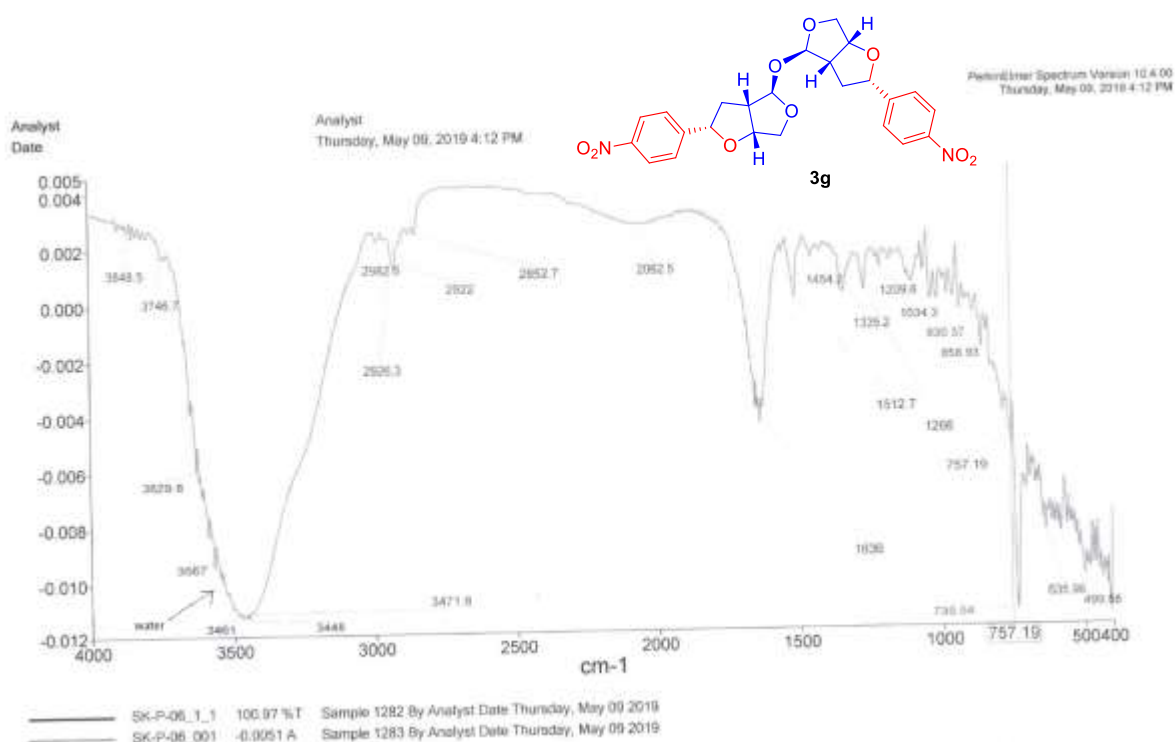

### IR spectrum of compound 4g

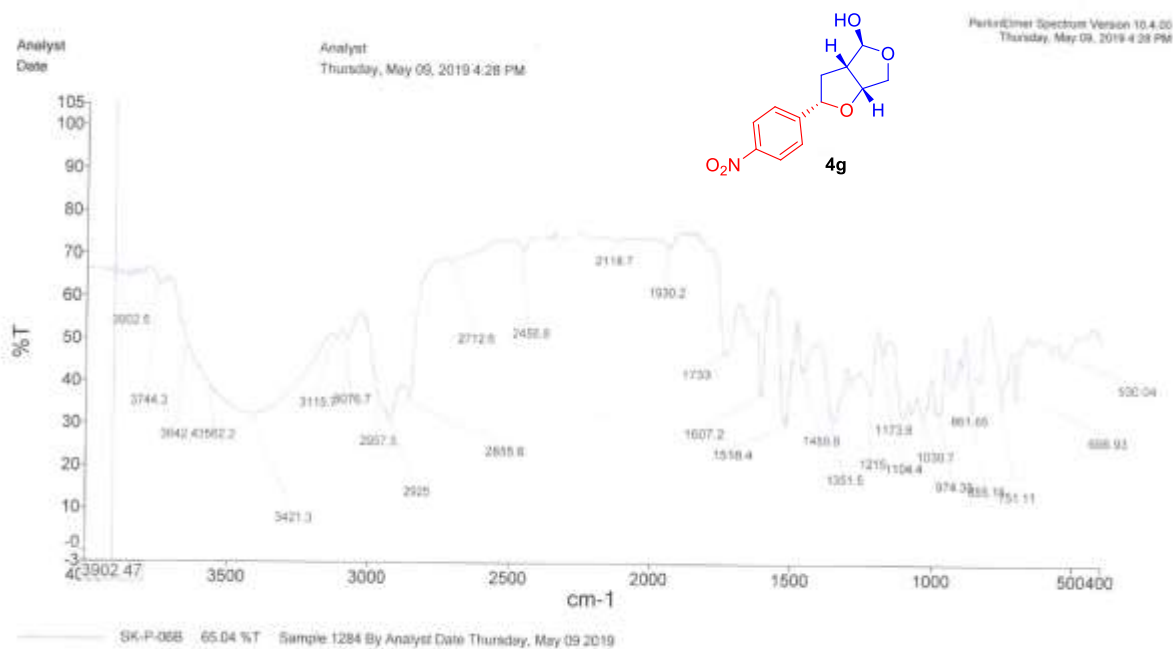



### IR spectrum of compound 3h

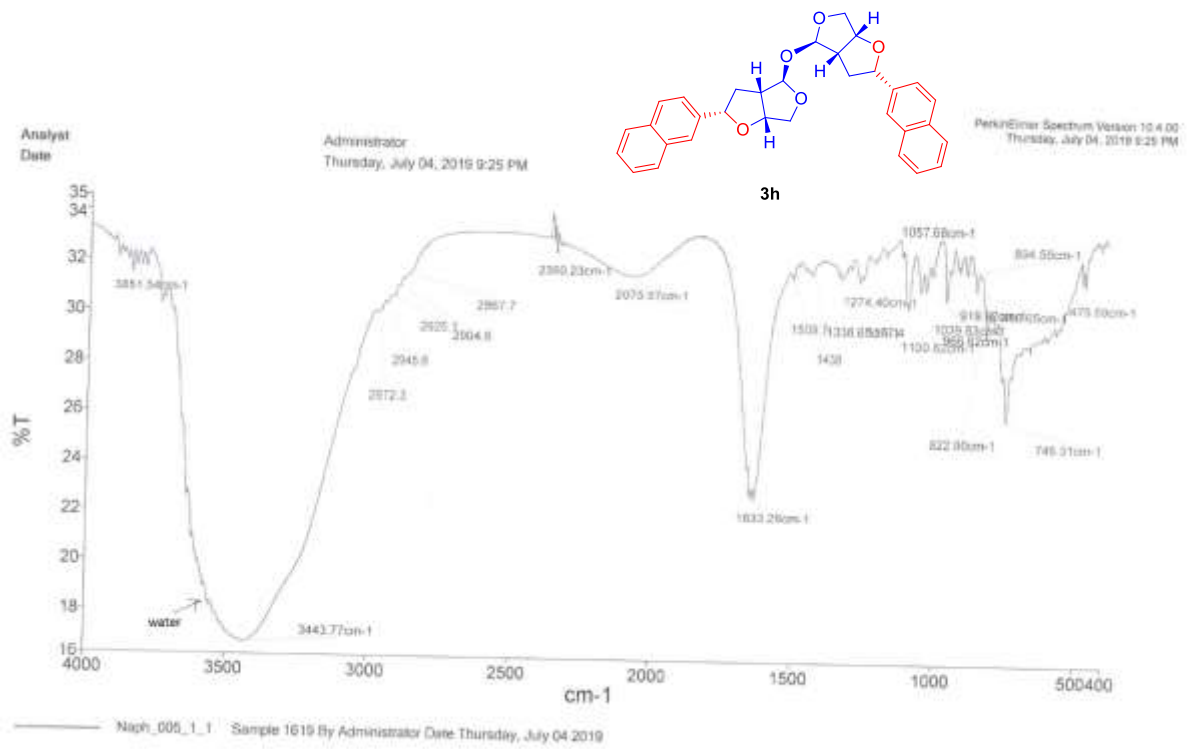

### IR spectrum of compound 4h

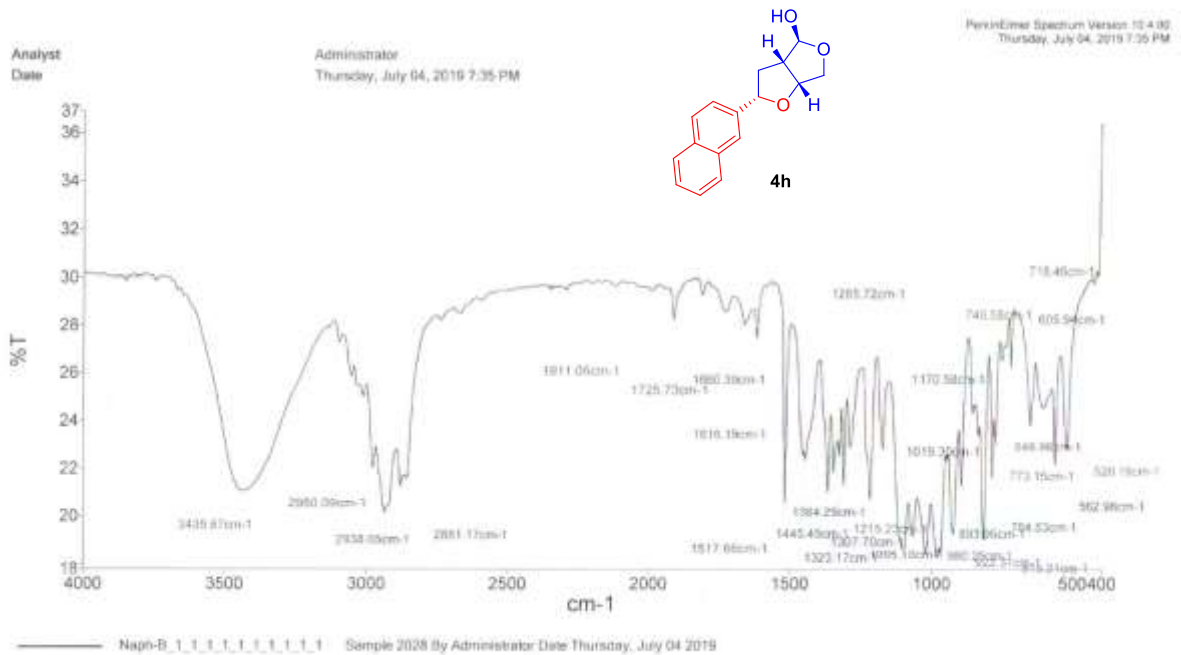

IR spectrum of compound 3i

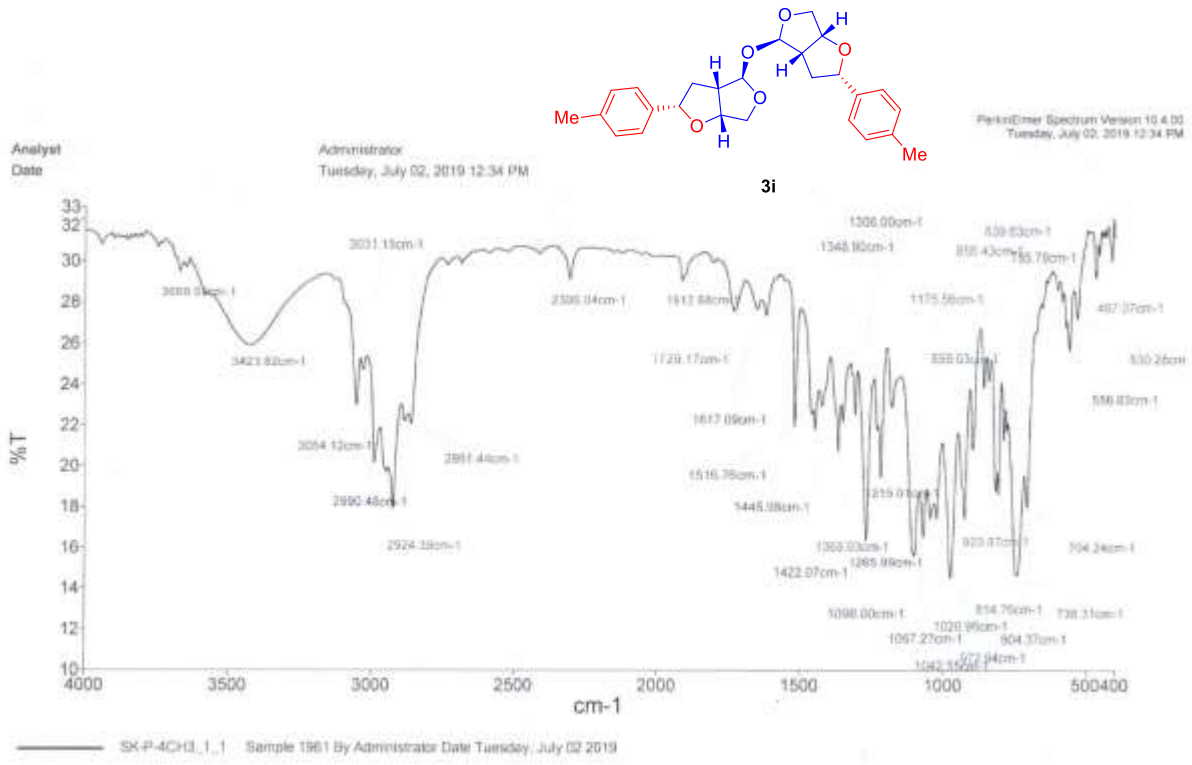

IR spectrum of compound 4i

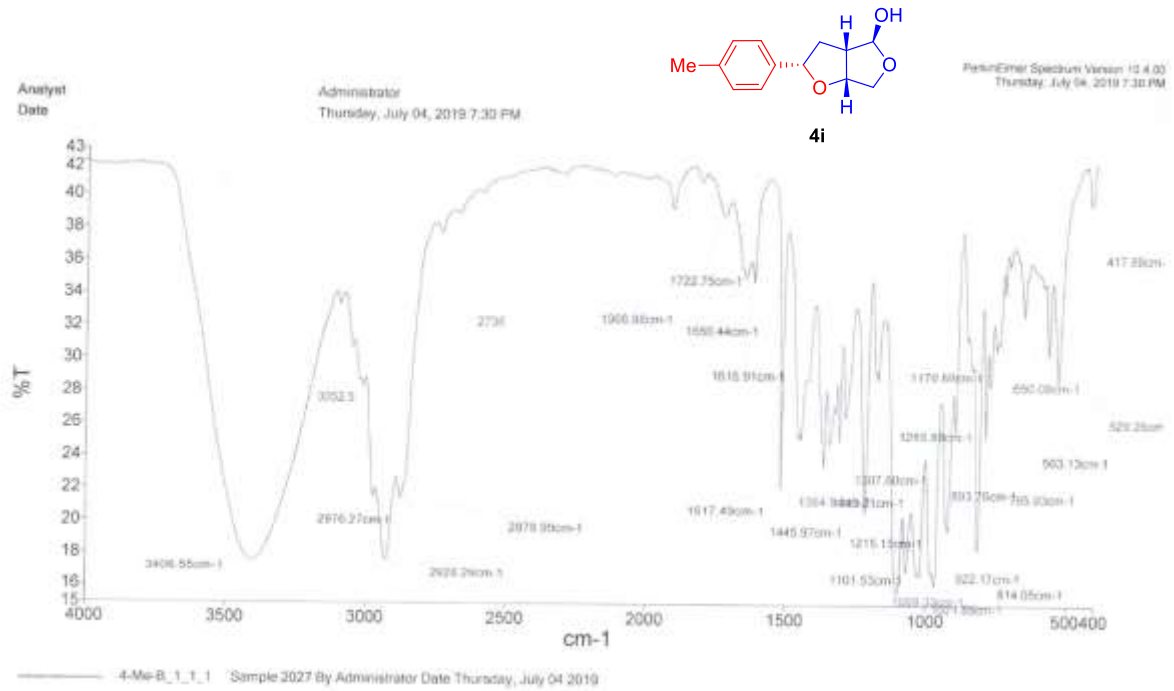

IR spectrum of compound 4j

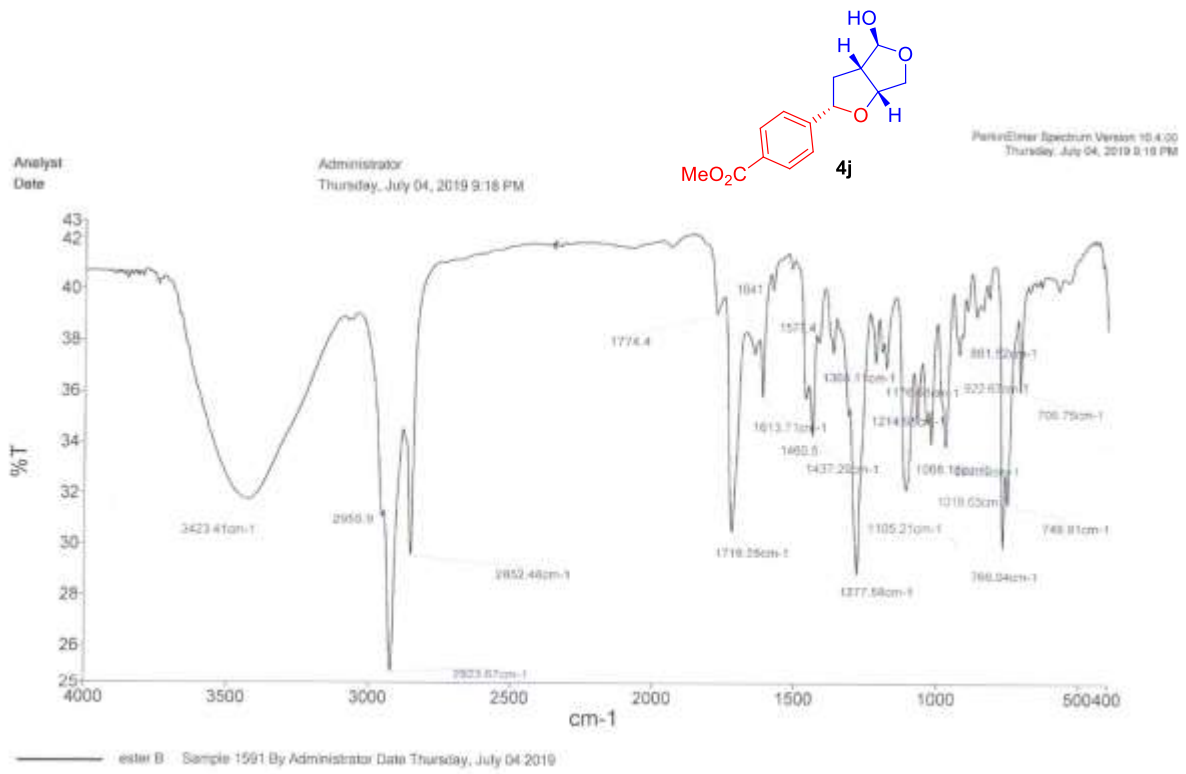

IR spectrum of compound 3k

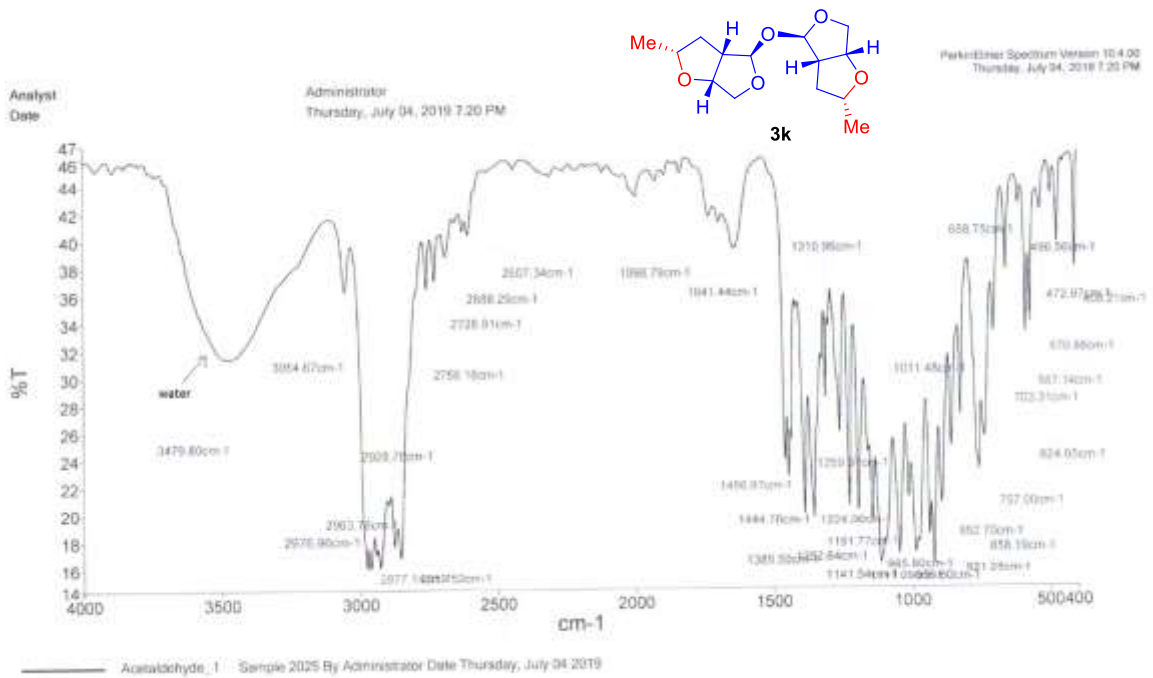

### IR spectrum of compound 4k

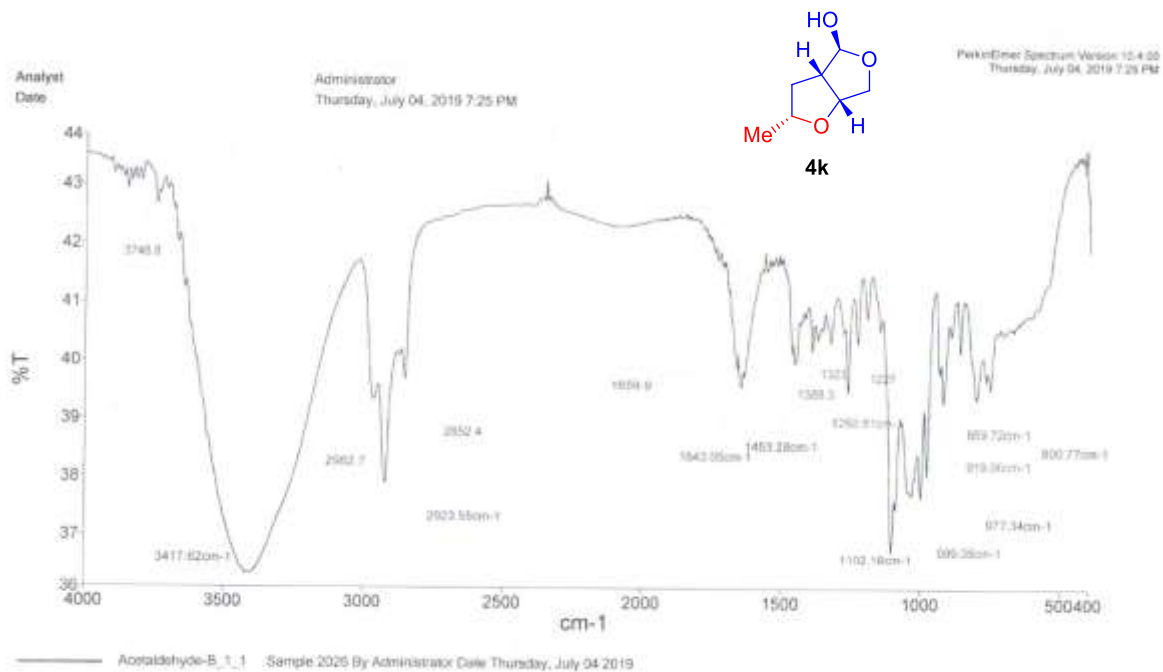

### IR spectrum of compound 3l

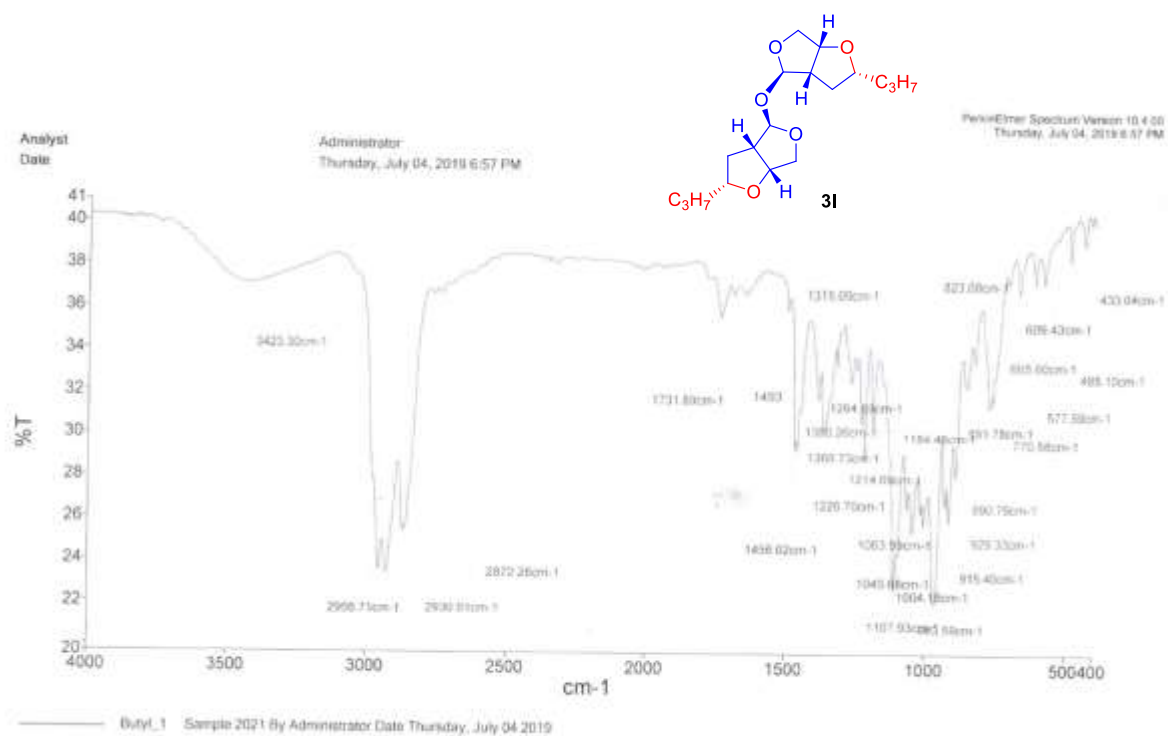

### IR spectrum of compound 4l

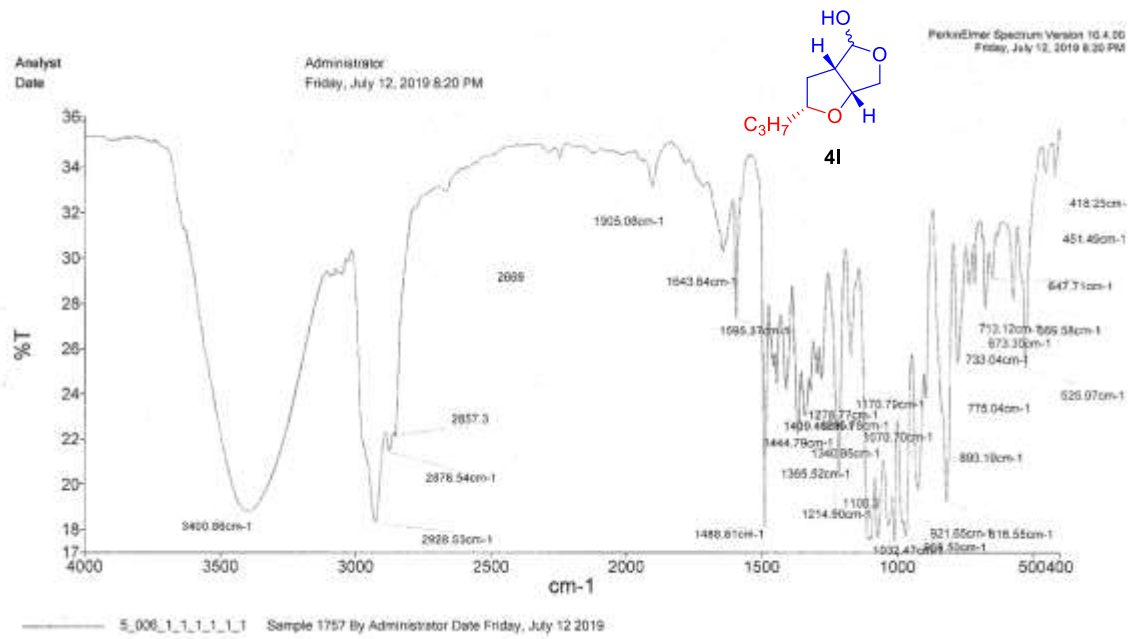

### IR spectrum of compound 4m

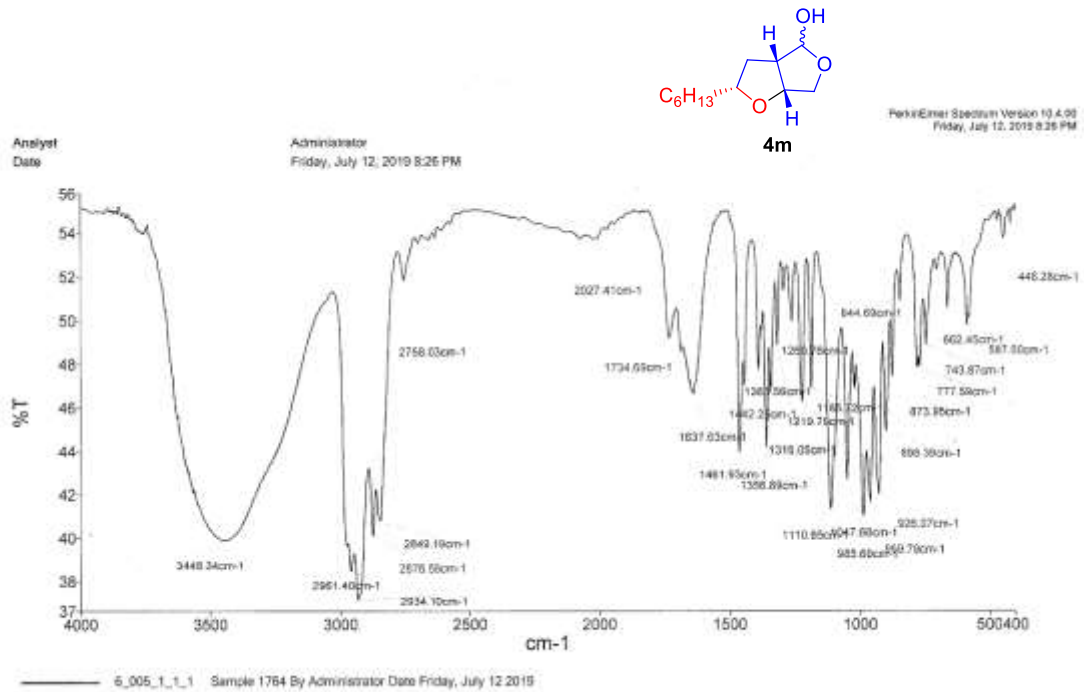

# IR spectrum of compound 5d

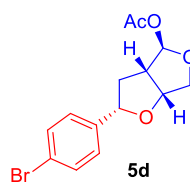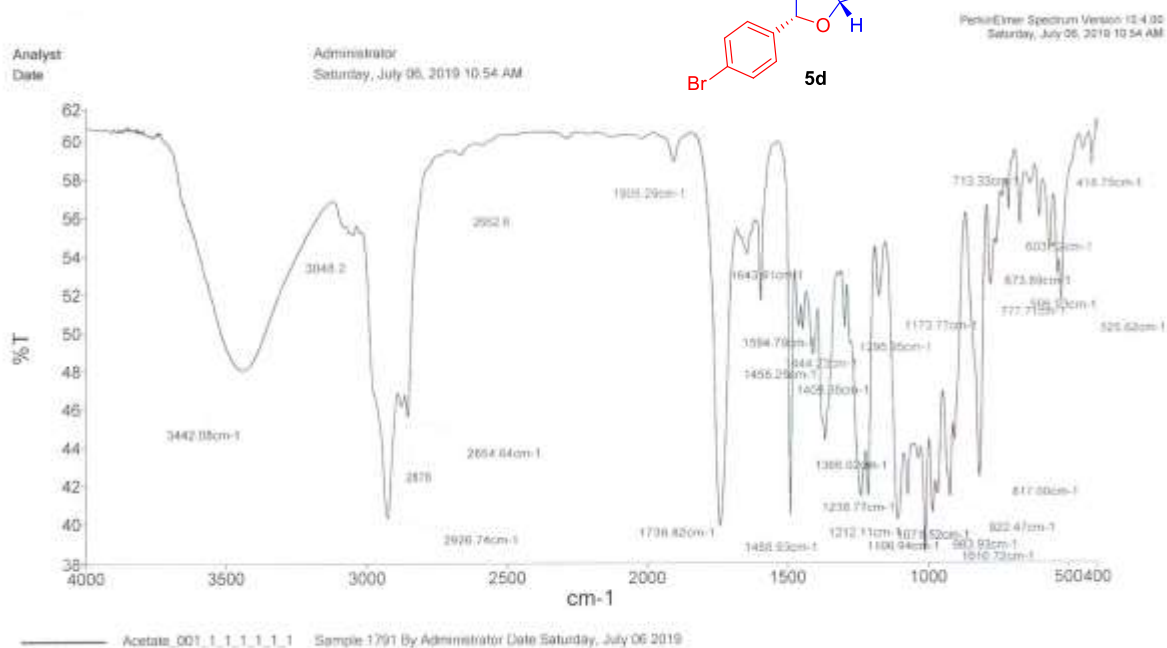

Supplement: c9ob01353a3.pdf [file c9ob01353a3.pdf]
